# Supplementary material for: Lupane Triterpenes from the Leaves of Acanthopanax gracilistylus
Source: PubMed Central journal article supplement (PMC6017332; doi:10.3390/molecules23010087), 2018-01-01
Supplement: molecules-23-00087-s001.pdf [file molecules-23-00087-s001.pdf]

# Supporting Information

## Lupane Triterpenes from Leave of *Acanthopanax gracilistylus*

Xiao-Jun Li <sup>1,2,†</sup>, Qin-Peng Zou <sup>3,†</sup>, Xiang Wang <sup>1</sup>, Kwan-Woo Kim <sup>2</sup>, Mao-Fang Lu <sup>1</sup>,  
Sung-Kwon Ko <sup>4</sup>, Chang-Soo Yook <sup>5</sup>, Youn-Chul Kim <sup>2,\*</sup>, and Xiang-Qian Liu <sup>1,\*</sup>

<sup>1</sup> School of Pharmacy, Hunan University of Chinese Medicine, Changsha, Hunan 410208, China; 598237392@qq.com (X.-J.L.); 571340394@qq.com (X.W.); 79403002@qq.com (M.-F.L.); lxq0001cn@163.com (X.-Q.L.);

<sup>2</sup> College of Pharmacy, Wonkwang University, Iksan 570-749, Korea; swamp1@naver.com (K.-W.K.); yckim@wku.ac.kr (Y.-C.K.);

<sup>3</sup> Broad-Ocean Bio-Science and Technique Co., Ltd of Changsha, Hunan Changsha 410205, China; 511107871@qq.com (Q.-P.Z.)

<sup>4</sup> Department of Oriental Medical Food & Nutrition, Semyung University, Jecheon 27136, Korea; skko@semyung.ac.kr (S.-K.K.)

<sup>5</sup> School of Pharmacy, KyungHee University, Seoul 130-701, Korea; yookcs@khu.ac.kr (C.-S.Y.)

\* Correspondence: lxq0001cn@163.com (X.-Q.L.); Tel.: +86-731-88458240 (X.-Q.L.); yckim@wku.ac.kr (Y.-C.K.); Tel.: +82-63-850-6823 (Y.-C.K.);

† X.-J.L. and Q.-P.Z. contribute equally to this work.

## Contents of Supporting Information

| NO. | Contents                                                                                                                       | Pages |
|-----|--------------------------------------------------------------------------------------------------------------------------------|-------|
| 1   | <b>Figure S1.</b> Photo of <i>Acanthopanax gracilistylus</i> W. W. Smith                                                       | 1     |
| 2   | <b>Figure S2.</b> <sup>1</sup> H NMR spectrum of acangraciligenin S in acetone- <i>d</i> <sub>6</sub>                          | 2     |
| 3   | <b>Figure S3.</b> Expand <sup>1</sup> H NMR spectrum of acangraciligenin S in acetone- <i>d</i> <sub>6</sub>                   | 2     |
| 4   | <b>Figure S4.</b> Expand <sup>1</sup> H NMR spectrum of acangraciligenin S in acetone- <i>d</i> <sub>6</sub>                   | 3     |
| 5   | <b>Figure S5.</b> <sup>13</sup> C NMR spectrum of acangraciligenin S in acetone- <i>d</i> <sub>6</sub>                         | 3     |
| 6   | <b>Figure S6.</b> Expand <sup>13</sup> C NMR spectrum of acangraciligenin S in acetone- <i>d</i> <sub>6</sub>                  | 4     |
| 7   | <b>Figure S7.</b> Expand <sup>13</sup> C NMR spectrum of acangraciligenin S in acetone- <i>d</i> <sub>6</sub>                  | 4     |
| 8   | <b>Figure S8.</b> Expand <sup>13</sup> C NMR spectrum of acangraciligenin S in acetone- <i>d</i> <sub>6</sub>                  | 5     |
| 9   | <b>Figure S9.</b> DEPT spectrum of acangraciligenin S in acetone- <i>d</i> <sub>6</sub>                                        | 5     |
| 10  | <b>Figure S10.</b> Expand DEPT spectrum of acangraciligenin S in acetone- <i>d</i> <sub>6</sub>                                | 6     |
| 11  | <b>Figure S11.</b> HSQC spectrum of acangraciligenin S in acetone- <i>d</i> <sub>6</sub>                                       | 6     |
| 12  | <b>Figure S12.</b> Expand HSQC spectrum of acangraciligenin S in acetone- <i>d</i> <sub>6</sub>                                | 7     |
| 13  | <b>Figure S13.</b> Expand HSQC spectrum of acangraciligenin S in acetone- <i>d</i> <sub>6</sub>                                | 7     |
| 14  | <b>Figure S14.</b> HMBC spectrum of acangraciligenin S in acetone- <i>d</i> <sub>6</sub>                                       | 8     |
| 15  | <b>Figure S15.</b> Expand HMBC spectrum of acangraciligenin S in acetone- <i>d</i> <sub>6</sub>                                | 8     |
| 16  | <b>Figure S16.</b> Expand HMBC spectrum of acangraciligenin S in acetone- <i>d</i> <sub>6</sub>                                | 9     |
| 17  | <b>Figure S17.</b> <sup>1</sup> H- <sup>1</sup> H COSY spectrum of acangraciligenin S in acetone- <i>d</i> <sub>6</sub>        | 9     |
| 18  | <b>Figure S18.</b> Expand <sup>1</sup> H- <sup>1</sup> H COSY spectrum of acangraciligenin S in acetone- <i>d</i> <sub>6</sub> | 10    |
| 19  | <b>Figure S19.</b> Expand <sup>1</sup> H- <sup>1</sup> H COSY spectrum of acangraciligenin S in acetone- <i>d</i> <sub>6</sub> | 10    |
| 20  | <b>Figure S20.</b> NOESY spectrum of acangraciligenin S in acetone- <i>d</i> <sub>6</sub>                                      | 11    |
| 21  | <b>Figure S21.</b> Expand NOESY spectrum of acangraciligenin S in acetone- <i>d</i> <sub>6</sub>                               | 11    |
| 22  | <b>Figure S22.</b> Expand NOESY spectrum of acangraciligenin S in acetone- <i>d</i> <sub>6</sub>                               | 12    |
| 23  | <b>Figure S23.</b> ESIMS spectrum of acangraciligenin S                                                                        | 13    |
| 24  | <b>Figure S24.</b> HRESIMS spectrum of acangraciligenin S                                                                      | 13    |
| 25  | <b>Figure S25.</b> <sup>1</sup> H NMR spectrum of acangraciliside S in methanol- <i>d</i> <sub>4</sub>                         | 14    |
| 26  | <b>Figure S26.</b> Expand <sup>1</sup> H NMR spectrum of acangraciliside S in methanol- <i>d</i> <sub>4</sub>                  | 14    |
| 27  | <b>Figure S27.</b> Expand <sup>1</sup> H NMR spectrum of acangraciliside S in methanol- <i>d</i> <sub>4</sub>                  | 15    |
| 28  | <b>Figure S28.</b> Expand <sup>1</sup> H NMR spectrum of acangraciliside S in methanol- <i>d</i> <sub>4</sub>                  | 15    |
| 29  | <b>Figure S29.</b> <sup>13</sup> C NMR spectrum of acangraciliside S in methanol- <i>d</i> <sub>4</sub>                        | 16    |
| 30  | <b>Figure S30.</b> Expand <sup>13</sup> C NMR spectrum of acangraciliside S in methanol- <i>d</i> <sub>4</sub>                 | 16    |
| 31  | <b>Figure S31.</b> Expand <sup>13</sup> C NMR spectrum of acangraciliside S in methanol- <i>d</i> <sub>4</sub>                 | 17    |
| 32  | <b>Figure S32.</b> HSQC spectrum of acangraciliside S in methanol- <i>d</i> <sub>4</sub>                                       | 17    |
| 33  | <b>Figure S33.</b> Expand HSQC spectrum of acangraciliside S in methanol- <i>d</i> <sub>4</sub>                                | 18    |
| 34  | <b>Figure S34.</b> Expand HSQC spectrum of acangraciliside S in methanol- <i>d</i> <sub>4</sub>                                | 18    |
| 35  | <b>Figure S35.</b> HMBC spectrum of acangraciliside S in methanol- <i>d</i> <sub>4</sub>                                       | 19    |
| 36  | <b>Figure S36.</b> Expand HMBC spectrum of acangraciliside S in methanol- <i>d</i> <sub>4</sub>                                | 19    |
| 37  | <b>Figure S37.</b> Expand HMBC spectrum of acangraciliside S in methanol- <i>d</i> <sub>4</sub>                                | 20    |
| 38  | <b>Figure S38.</b> Expand HMBC spectrum of acangraciliside S in methanol- <i>d</i> <sub>4</sub>                                | 20    |
| 39  | <b>Figure S39.</b> <sup>1</sup> H- <sup>1</sup> H COSY spectrum of acangraciliside S in methanol- <i>d</i> <sub>4</sub>        | 21    |
| 40  | <b>Figure S40.</b> Expand <sup>1</sup> H- <sup>1</sup> H COSY spectrum of acangraciliside S in methanol- <i>d</i> <sub>4</sub> | 21    |
| 41  | <b>Figure S41.</b> Expand <sup>1</sup> H- <sup>1</sup> H COSY spectrum of acangraciliside S in methanol- <i>d</i> <sub>4</sub> | 22    |
| 42  | <b>Figure S42.</b> Expand <sup>1</sup> H- <sup>1</sup> H COSY spectrum of acangraciliside S in methanol- <i>d</i> <sub>4</sub> | 22    |

|    |                                                                                                                                                |    |
|----|------------------------------------------------------------------------------------------------------------------------------------------------|----|
| 43 | <b>Figure S43.</b> NOESY spectrum of acangraciliside S in methanol- $d_4$                                                                      | 23 |
| 44 | <b>Figure S44.</b> Expand NOESY spectrum of acangraciliside S in methanol- $d_4$                                                               | 23 |
| 45 | <b>Figure S45.</b> Expand NOESY spectrum of acangraciliside S in methanol- $d_4$                                                               | 24 |
| 46 | <b>Figure S46.</b> ESIMS spectrum of acangraciliside S                                                                                         | 25 |
| 47 | <b>Figure S47.</b> HRESIMS spectrum of acangraciliside S                                                                                       | 25 |
| 48 | <b>Figure S48.</b> $^1\text{H}$ NMR spectrum of <b>2a</b> in acetone- $d_6$                                                                    | 26 |
| 49 | <b>Figure S49.</b> Expand $^1\text{H}$ NMR spectrum of <b>2a</b> in acetone- $d_6$                                                             | 26 |
| 50 | <b>Figure S50.</b> Expand $^1\text{H}$ NMR spectrum of <b>2a</b> in acetone- $d_6$                                                             | 27 |
| 51 | <b>Figure S51.</b> $^{13}\text{C}$ NMR spectrum of <b>2a</b> in acetone- $d_6$                                                                 | 27 |
| 52 | <b>Figure S52.</b> Expand $^{13}\text{C}$ NMR spectrum of <b>2a</b> in acetone- $d_6$                                                          | 28 |
| 53 | <b>Figure S53.</b> Expand $^{13}\text{C}$ NMR spectrum of <b>2a</b> in acetone- $d_6$                                                          | 28 |
| 54 | <b>Figure S54.</b> Expand $^{13}\text{C}$ NMR spectrum of <b>2a</b> in acetone- $d_6$                                                          | 29 |
| 55 | <b>Figure S55.</b> DEPT spectrum of <b>2a</b> in acetone- $d_6$                                                                                | 29 |
| 56 | <b>Figure S56.</b> Expand DEPT spectrum of <b>2a</b> in acetone- $d_6$                                                                         | 30 |
| 57 | <b>Figure S57.</b> $^1\text{H}$ NMR spectrum of $3\alpha,11\alpha$ -dihydroxy-lup-20(29)-en-23,28-dioic acid in acetone- $d_6$                 | 30 |
| 58 | <b>Figure S58.</b> Expand $^1\text{H}$ NMR spectrum of $3\alpha,11\alpha$ -dihydroxy-lup-20(29)-en-23,28-dioic acid in acetone- $d_6$          | 31 |
| 59 | <b>Figure S59.</b> Expand $^1\text{H}$ NMR spectrum of $3\alpha,11\alpha$ -dihydroxy-lup-20(29)-en-23,28-dioic acid in acetone- $d_6$          | 31 |
| 60 | <b>Figure S60.</b> $^{13}\text{C}$ NMR spectrum of $3\alpha,11\alpha$ -dihydroxy-lup-20(29)-en-23,28-dioic acid in acetone- $d_6$              | 32 |
| 61 | <b>Figure S61.</b> Expand $^{13}\text{C}$ NMR spectrum of $3\alpha,11\alpha$ -dihydroxy-lup-20(29)-en-23,28-dioic acid in acetone- $d_6$       | 32 |
| 62 | <b>Figure S62.</b> Expand $^{13}\text{C}$ NMR spectrum of $3\alpha,11\alpha$ -dihydroxy-lup-20(29)-en-23,28-dioic acid in acetone- $d_6$       | 33 |
| 63 | <b>Figure S63.</b> Expand $^{13}\text{C}$ NMR spectrum of $3\alpha,11\alpha$ -dihydroxy-lup-20(29)-en-23,28-dioic acid in acetone- $d_6$       | 33 |
| 64 | <b>Figure S64.</b> DEPT spectrum of $3\alpha,11\alpha$ -dihydroxy-lup-20(29)-en-23,28-dioic acid in acetone- $d_6$                             | 34 |
| 65 | <b>Figure S65.</b> Expand DEPT spectrum of $3\alpha,11\alpha$ -dihydroxy-lup-20(29)-en-23,28-dioic acid in acetone- $d_6$                      | 34 |
| 66 | <b>Figure S66.</b> Expand DEPT spectrum of $3\alpha,11\alpha$ -dihydroxy-lup-20(29)-en-23,28-dioic acid in acetone- $d_6$                      | 35 |
| 67 | <b>Figure S67.</b> HSQC spectrum of $3\alpha,11\alpha$ -dihydroxy-lup-20(29)-en-23,28-dioic acid in acetone- $d_6$                             | 35 |
| 68 | <b>Figure S68.</b> Expand HSQC spectrum of $3\alpha,11\alpha$ -dihydroxy-lup-20(29)-en-23,28-dioic acid in acetone- $d_6$                      | 36 |
| 69 | <b>Figure S69.</b> Expand HSQC spectrum of $3\alpha,11\alpha$ -dihydroxy-lup-20(29)-en-23,28-dioic acid in acetone- $d_6$                      | 36 |
| 70 | <b>Figure S70.</b> HMBC spectrum of $3\alpha,11\alpha$ -dihydroxy-lup-20(29)-en-23,28-dioic acid in acetone- $d_6$                             | 37 |
| 71 | <b>Figure S71.</b> Expand HMBC spectrum of $3\alpha,11\alpha$ -dihydroxy-lup-20(29)-en-23,28-dioic acid in acetone- $d_6$                      | 37 |
| 72 | <b>Figure S72.</b> Expand HMBC spectrum of $3\alpha,11\alpha$ -dihydroxy-lup-20(29)-en-23,28-dioic acid in acetone- $d_6$                      | 38 |
| 73 | <b>Figure S73.</b> Expand HMBC spectrum of $3\alpha,11\alpha$ -dihydroxy-lup-20(29)-en-23,28-dioic acid in acetone- $d_6$                      | 38 |
| 74 | <b>Figure S74.</b> $^1\text{H}$ - $^1\text{H}$ COSY spectrum of $3\alpha,11\alpha$ -dihydroxy-lup-20(29)-en-23,28-dioic acid in acetone- $d_6$ | 39 |

|    |                                                                                                                                                       |    |
|----|-------------------------------------------------------------------------------------------------------------------------------------------------------|----|
| 75 | <b>Figure S75.</b> Expand $^1\text{H}$ - $^1\text{H}$ COSY spectrum of $3\alpha,11\alpha$ -dihydroxy-lup-20(29)-en-23,28-dioic acid in acetone- $d_6$ | 39 |
| 76 | <b>Figure S76.</b> Expand $^1\text{H}$ - $^1\text{H}$ COSY spectrum of $3\alpha,11\alpha$ -dihydroxy-lup-20(29)-en-23,28-dioic acid in acetone- $d_6$ | 40 |
| 77 | <b>Figure S77.</b> NOESY spectrum of $3\alpha,11\alpha$ -dihydroxy-lup-20(29)-en-23,28-dioic acid in acetone- $d_6$                                   | 40 |
| 78 | <b>Figure S78.</b> Expand NOESY spectrum of $3\alpha,11\alpha$ -dihydroxy-lup-20(29)-en-23,28-dioic acid in acetone- $d_6$                            | 41 |
| 79 | <b>Figure S79.</b> $^1\text{H}$ NMR spectrum of acankoreoside C in methanol- $d_4$                                                                    | 41 |
| 80 | <b>Figure S80.</b> Expand $^1\text{H}$ NMR spectrum of acankoreoside C in methanol- $d_4$                                                             | 42 |
| 81 | <b>Figure S81.</b> Expand $^1\text{H}$ NMR spectrum of acankoreoside C in methanol- $d_4$                                                             | 42 |
| 82 | <b>Figure S82.</b> Expand $^1\text{H}$ NMR spectrum of acankoreoside C in methanol- $d_4$                                                             | 43 |
| 83 | <b>Figure S83.</b> $^{13}\text{C}$ NMR spectrum of acankoreoside C in methanol- $d_4$                                                                 | 43 |
| 84 | <b>Figure S84.</b> Expand $^{13}\text{C}$ NMR spectrum of acankoreoside C in methanol- $d_4$                                                          | 44 |
| 85 | <b>Figure S85.</b> Expand $^{13}\text{C}$ NMR spectrum of acankoreoside C in methanol- $d_4$                                                          | 44 |
| 86 | <b>Table S1.</b> NMR spectral data of compound <b>1</b> in acetone- $d_6$                                                                             | 45 |
| 87 | <b>Table S2.</b> NMR spectral data of compound <b>2</b> in methanol- $d_4$                                                                            | 45 |
| 88 | <b>Table S3.</b> NMR spectral data of compounds <b>3-4</b>                                                                                            | 46 |

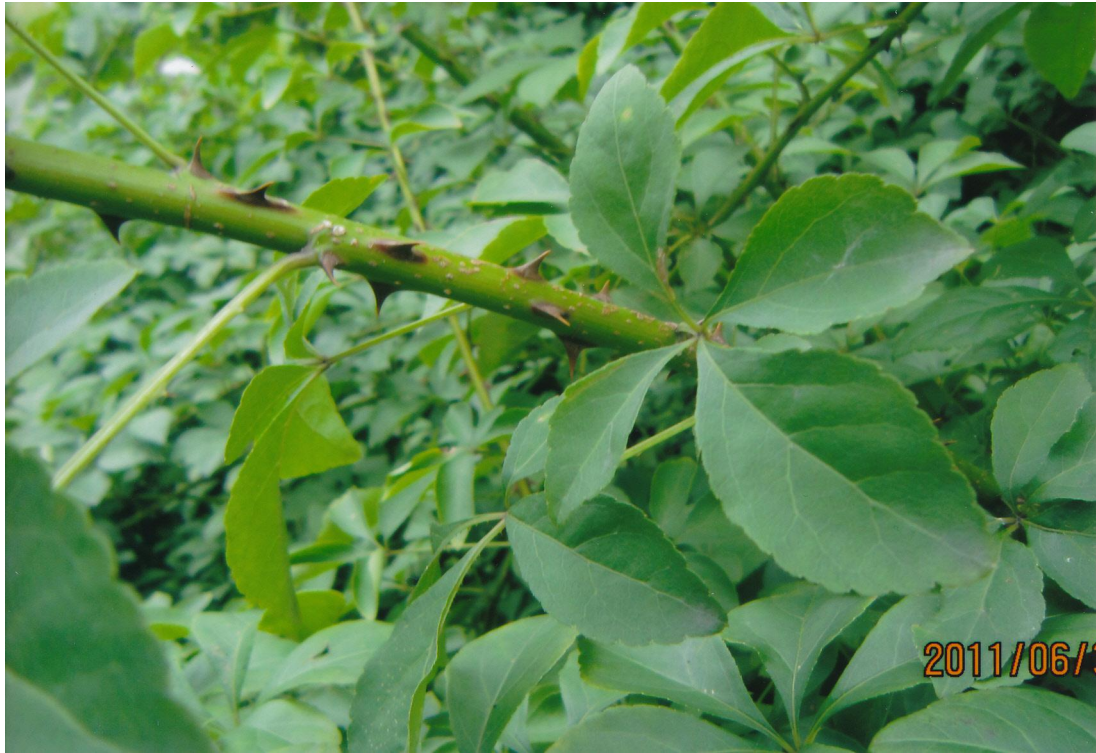

**Figure S1.** Photo of *Acanthopanax gracilistylus* W. W. Smith (Changsha City, Hunan Prov., by Liu Xiang-qian)

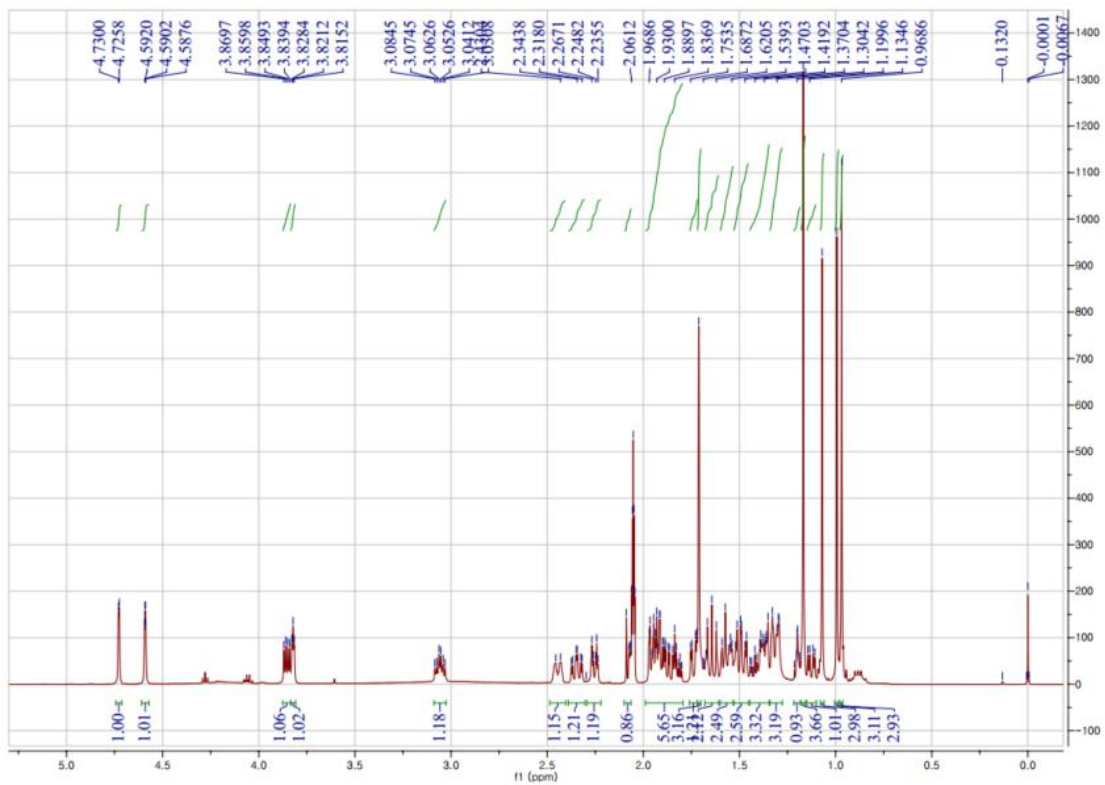

Figure S2.  $^1\text{H}$  NMR spectrum of acangraciligenin S in acetone- $d_6$

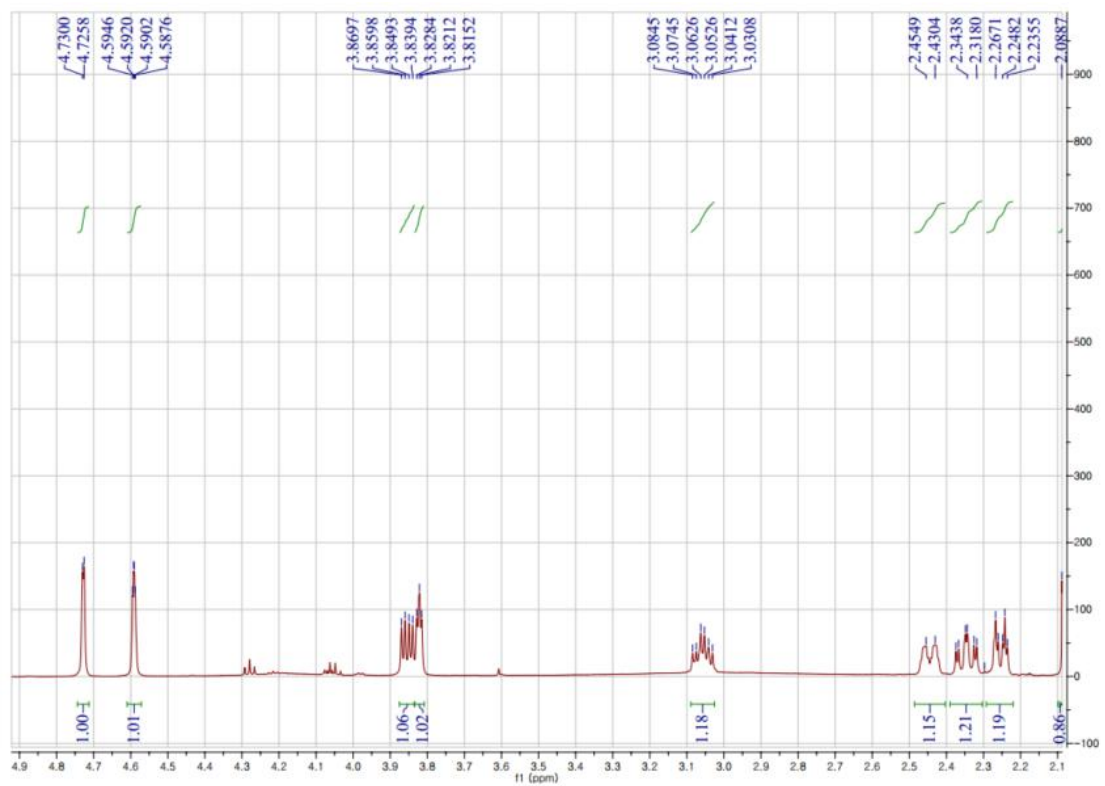

Figure S3. Expand  $^1\text{H}$  NMR spectrum of acangraciligenin S in acetone- $d_6$

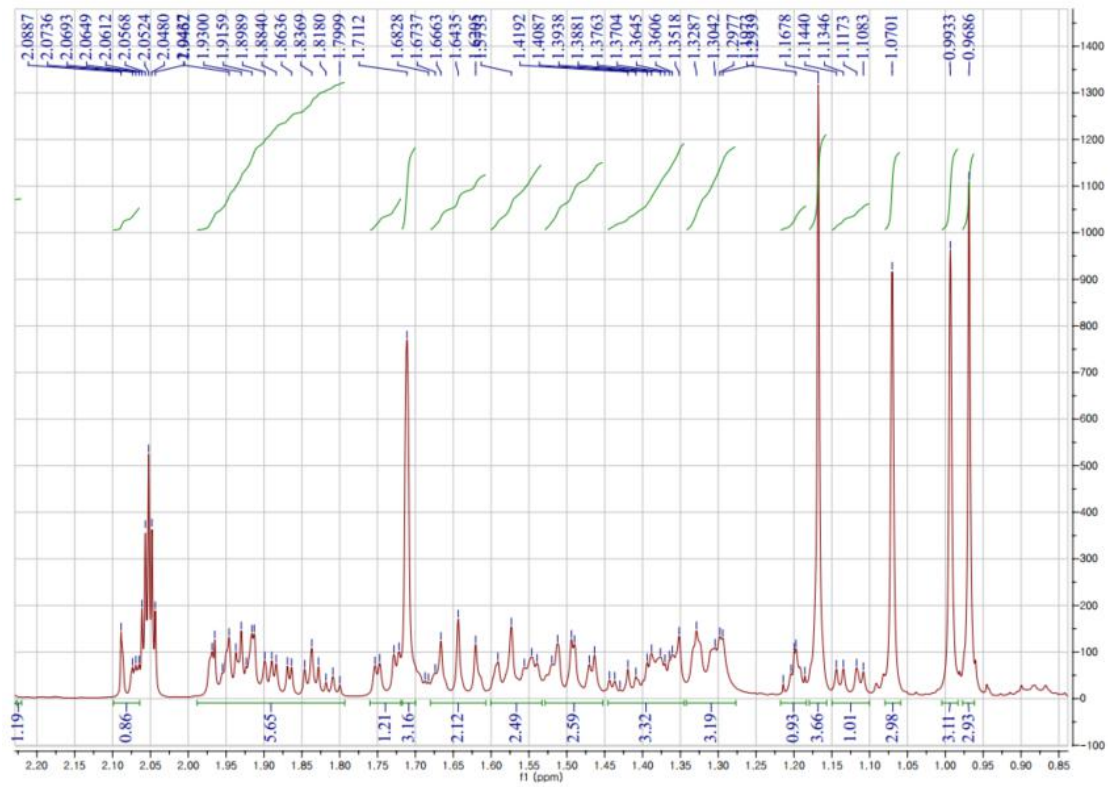

Figure S4. Expand  $^1\text{H}$  NMR spectrum of acangraciligenin S in acetone- $d_6$

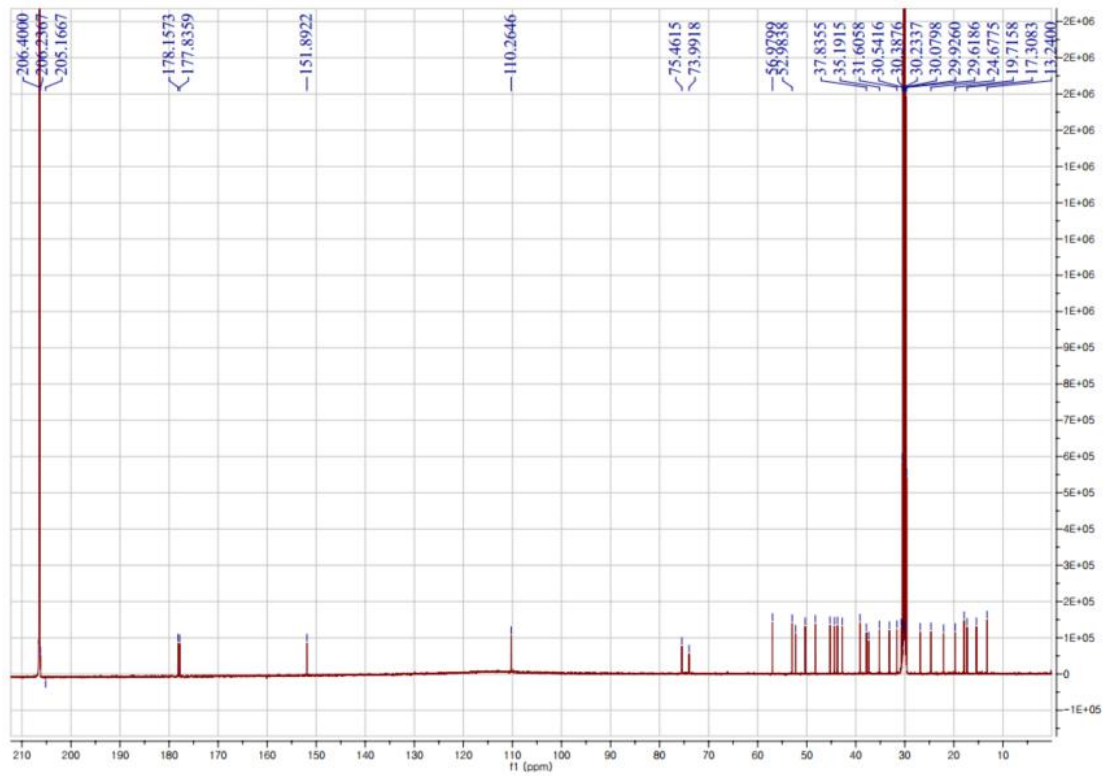

Figure S5.  $^{13}\text{C}$  NMR spectrum of acangraciligenin S in acetone- $d_6$



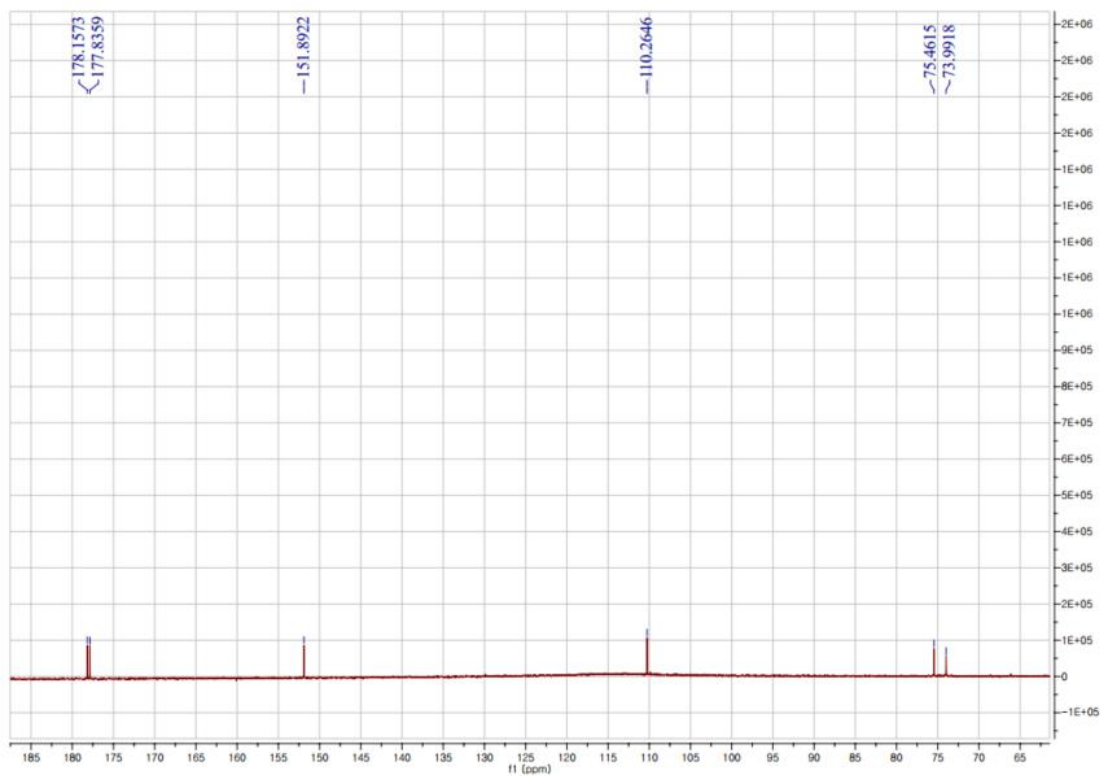

Figure S6. Expand  $^{13}\text{C}$  NMR spectrum of acangraciligenin S in acetone- $d_6$

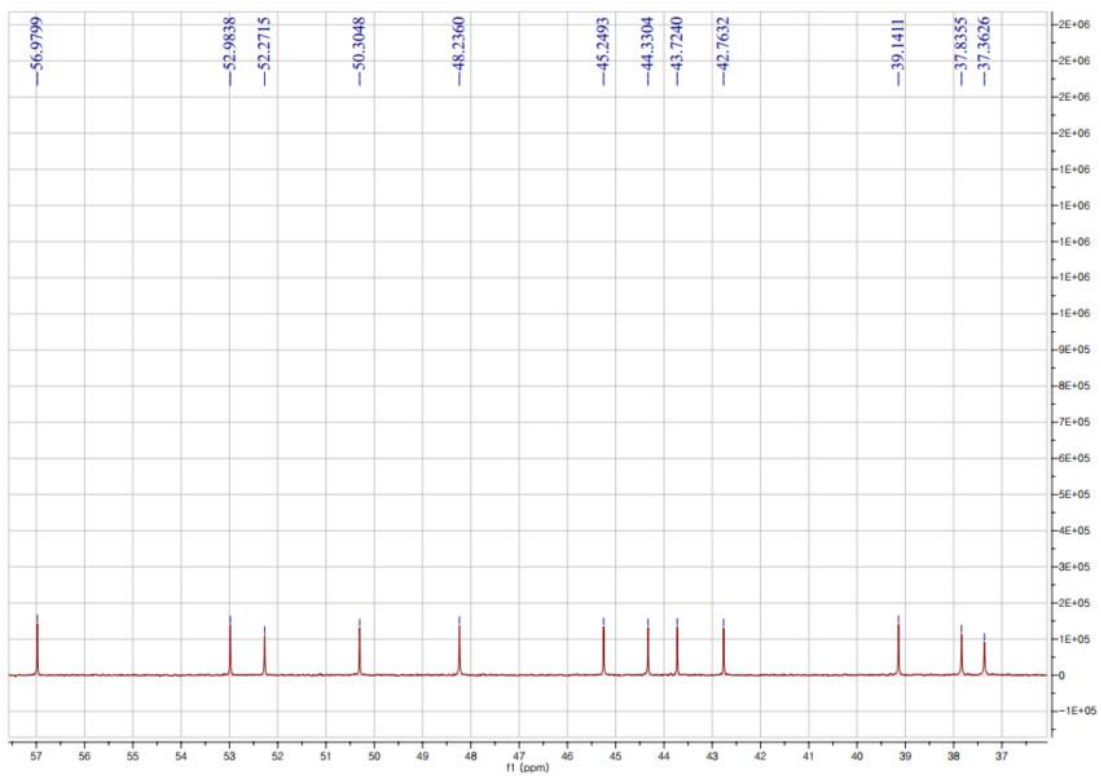

Figure S7. Expand  $^{13}\text{C}$  NMR spectrum of acangraciligenin S in acetone- $d_6$



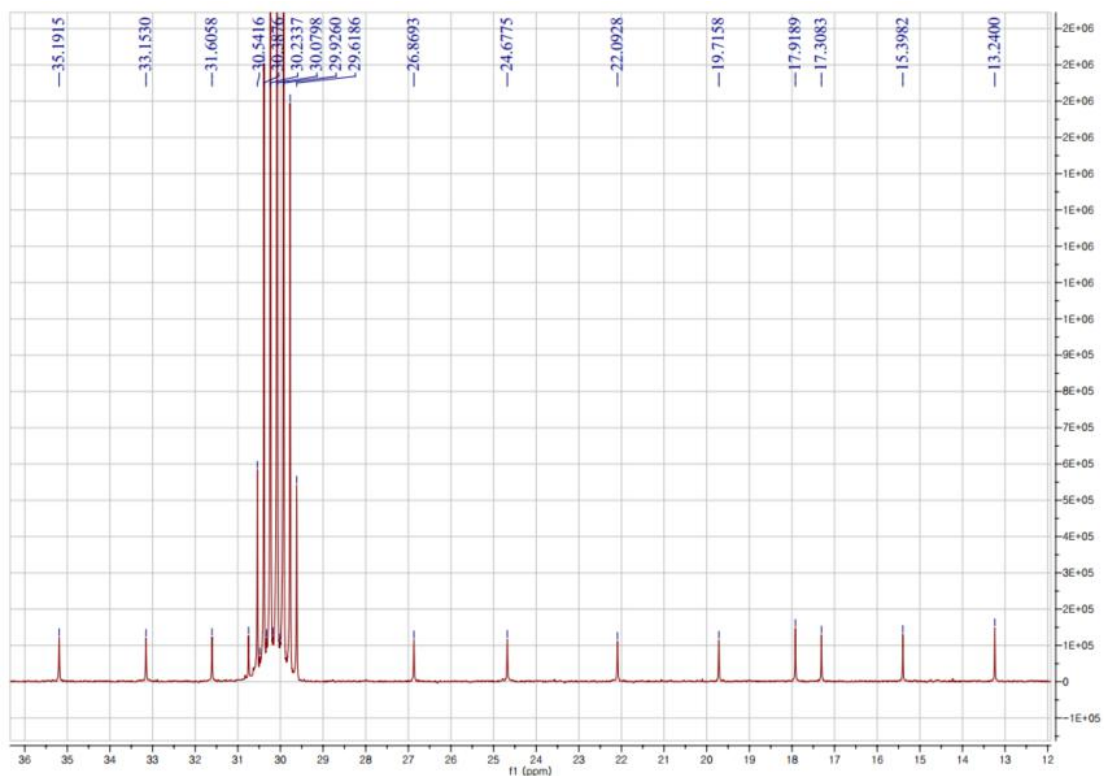

Figure S8. Expand <sup>13</sup>C NMR spectrum of acangraciligenin S in acetone-*d*<sub>6</sub>

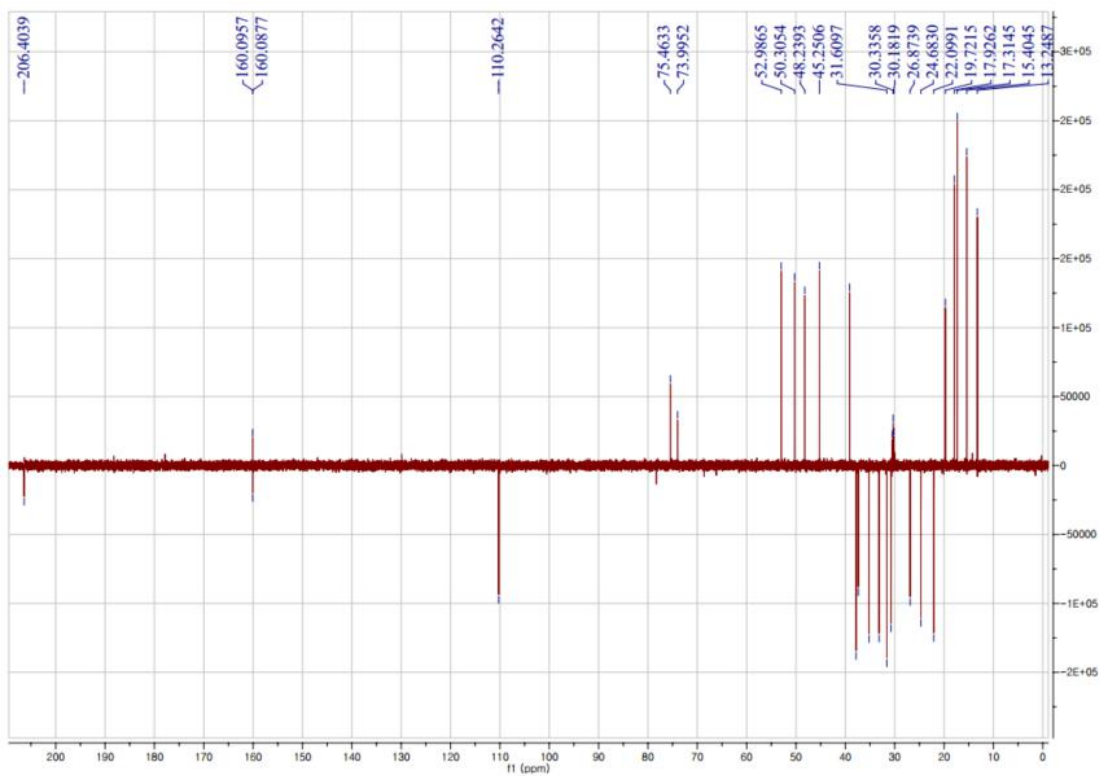

Figure S9. DEPT spectrum of acangraciligenin S in acetone-*d*<sub>6</sub>

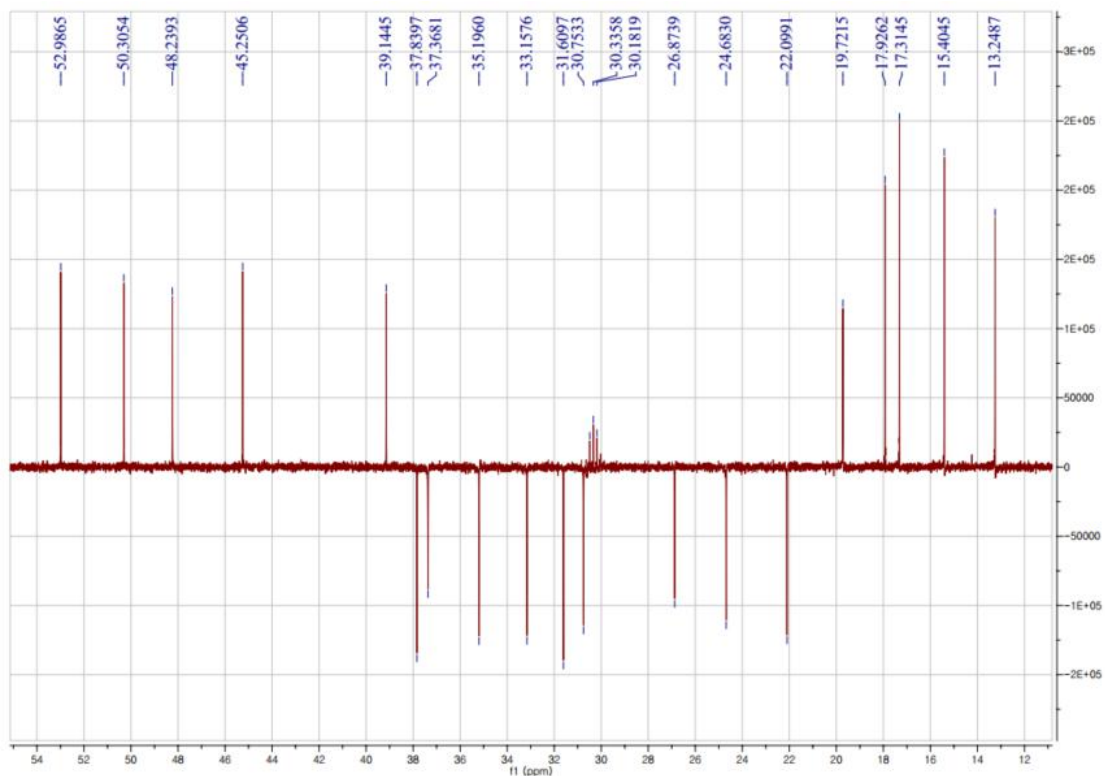

Figure S10. Expand DEPT spectrum of acangraciligenin S in acetone- $d_6$

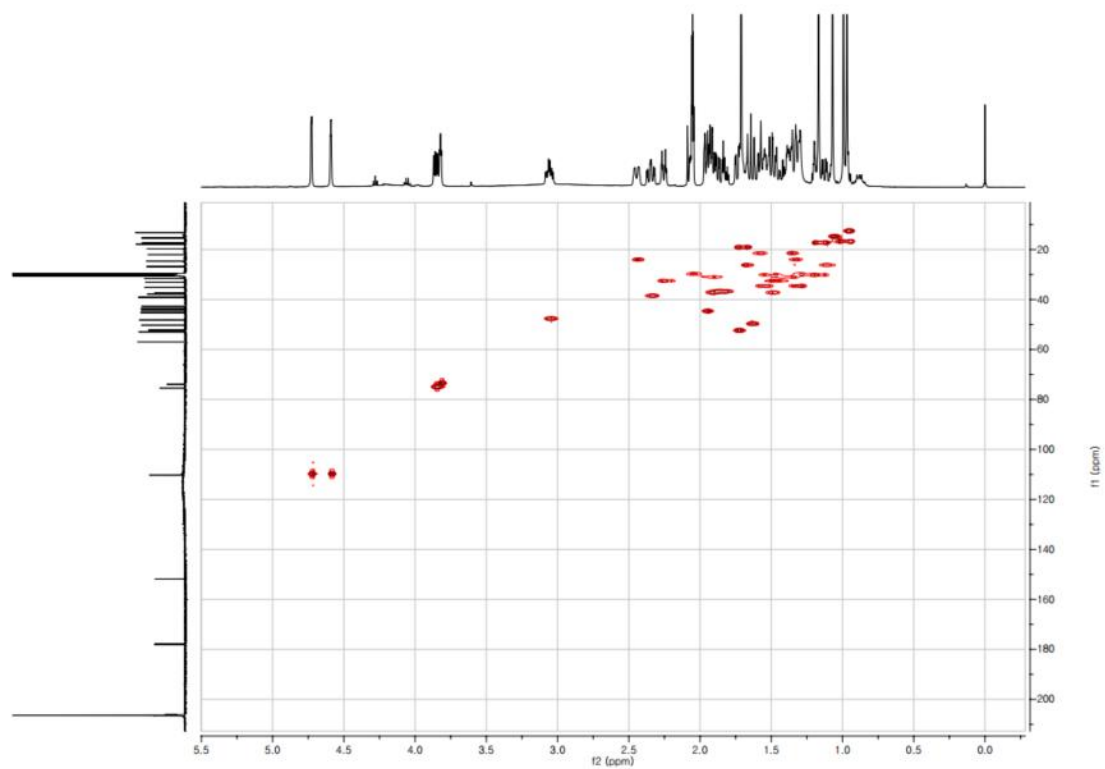

Figure S11. HSQC spectrum of acangraciligenin S in acetone- $d_6$

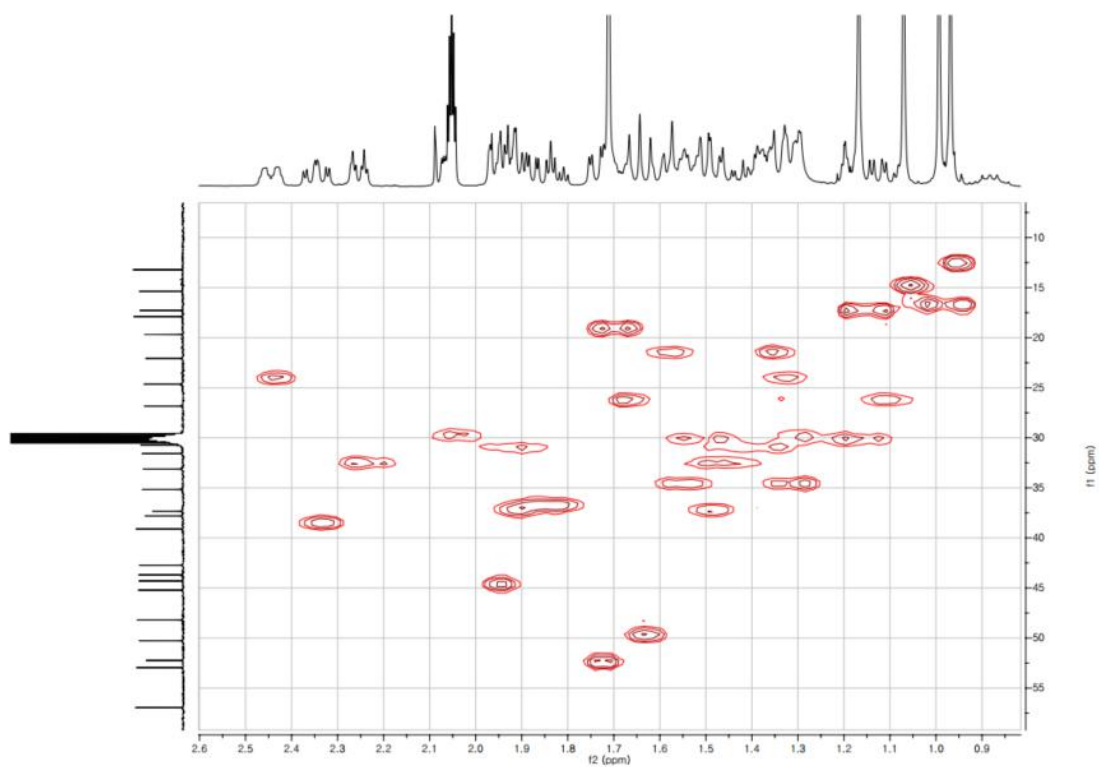

Figure S12. Expand HSQC spectrum of acangraciligenin S in acetone- $d_6$

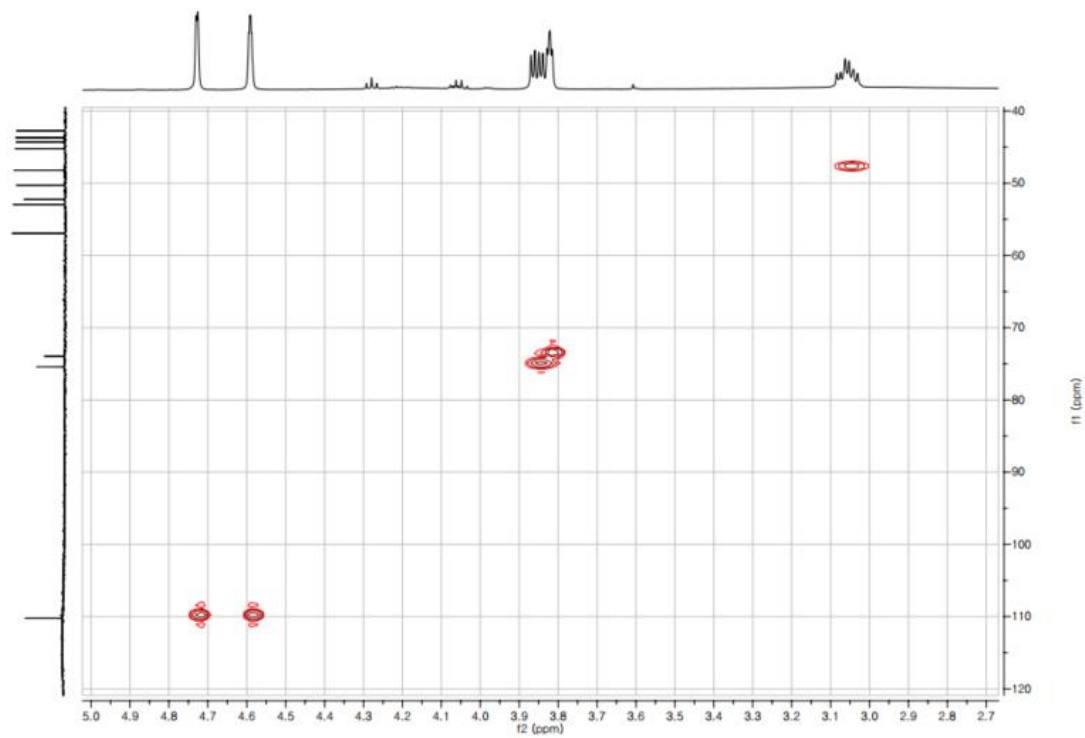

Figure S13. Expand HSQC spectrum of acangraciligenin S in acetone- $d_6$

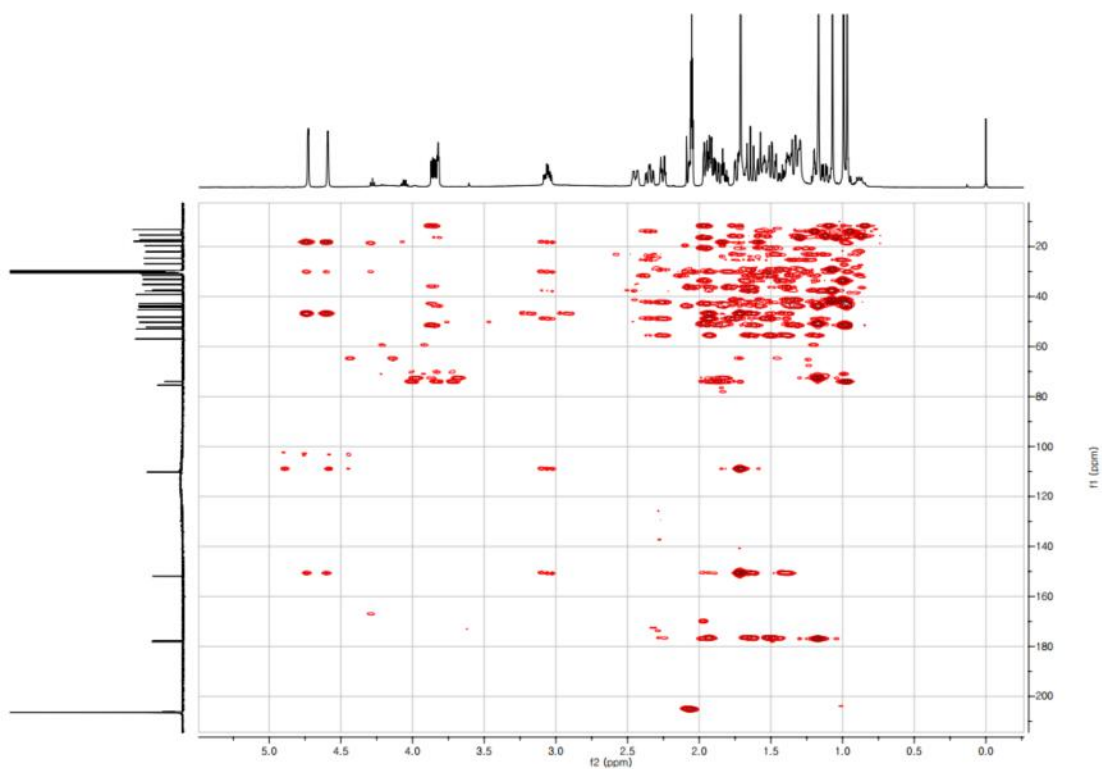

Figure S14. HMBC spectrum of acangraciligenin S in acetone- $d_6$

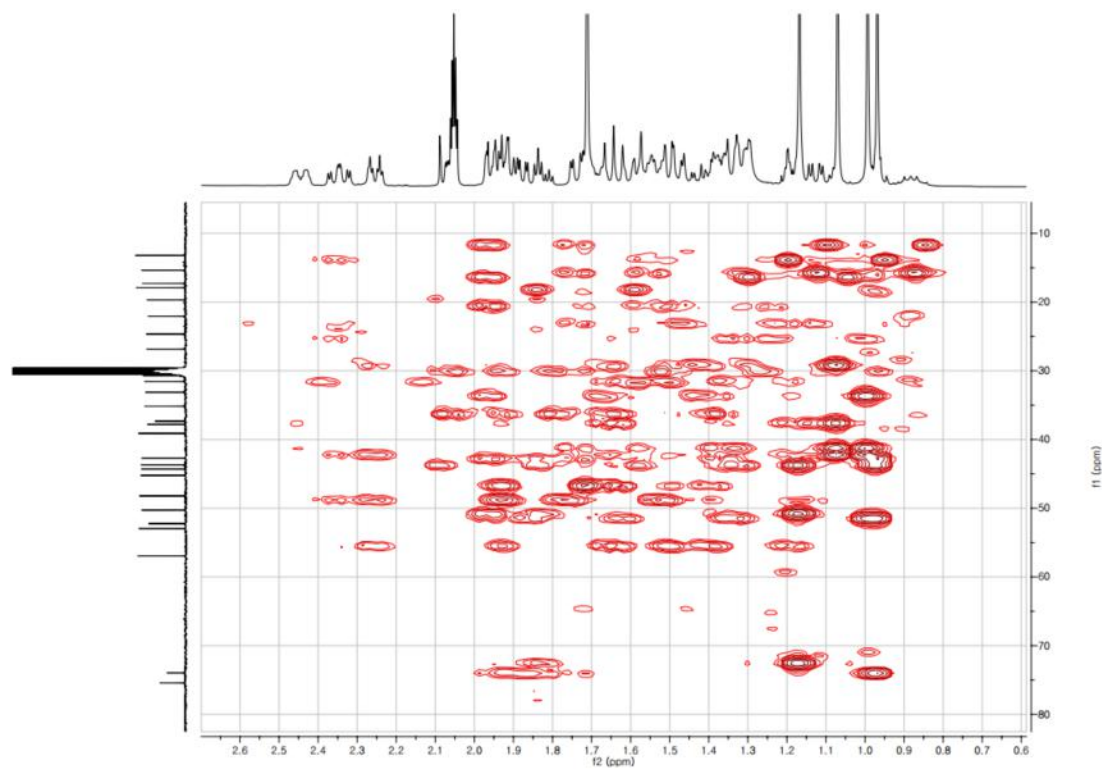

Figure S15. Expand HMBC spectrum of acangraciligenin S in acetone- $d_6$

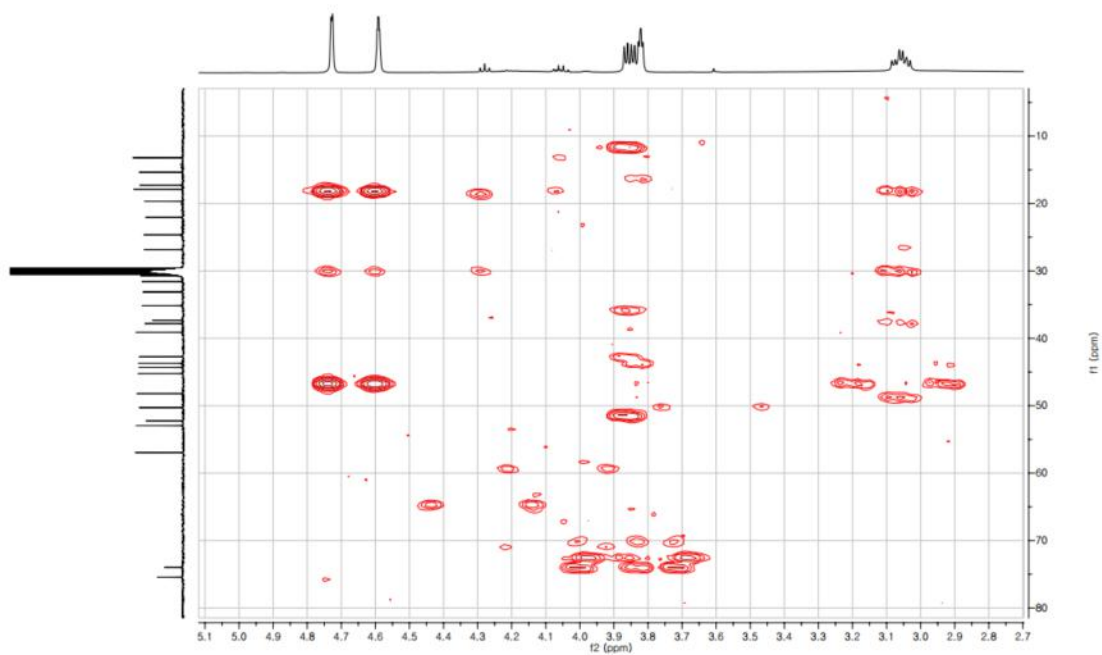

Figure S16. Expand HMBC spectrum of acangraciligenin S in acetone- $d_6$

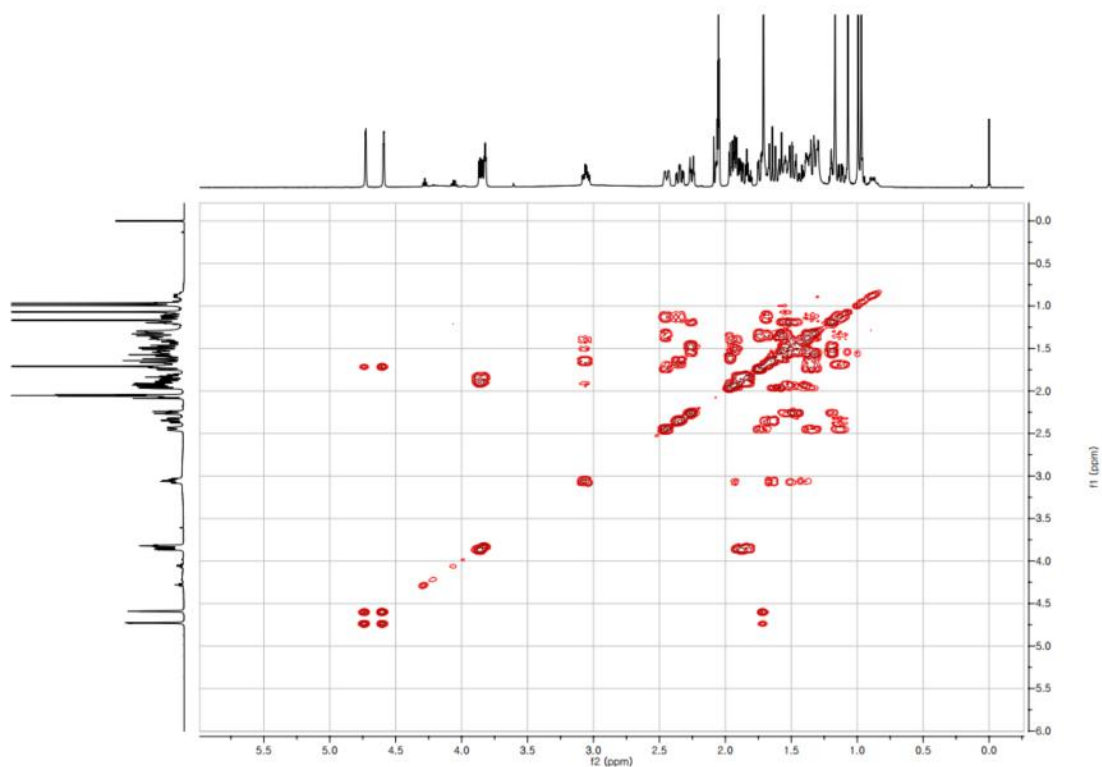

Figure S17.  $^1\text{H}$ - $^1\text{H}$  COSY spectrum of acangraciligenin S in acetone- $d_6$

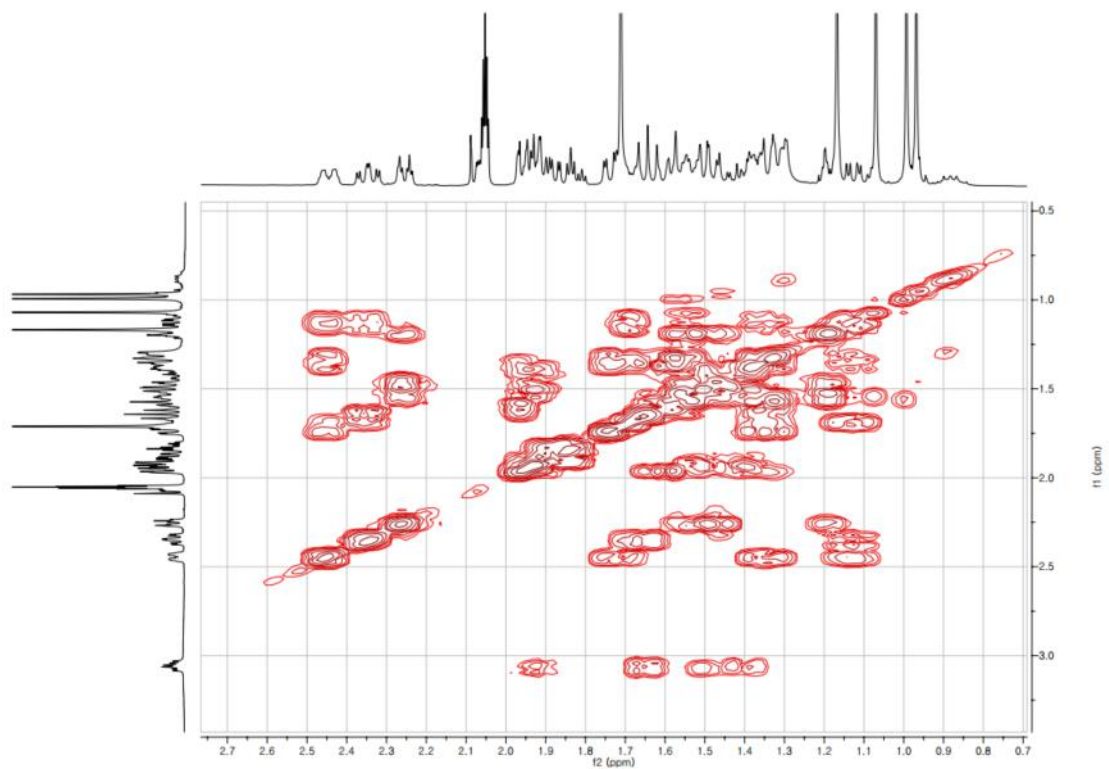

Figure S18. Expand  $^1\text{H}$ - $^1\text{H}$  COSY spectrum of acangraciligenin S in acetone- $d_6$

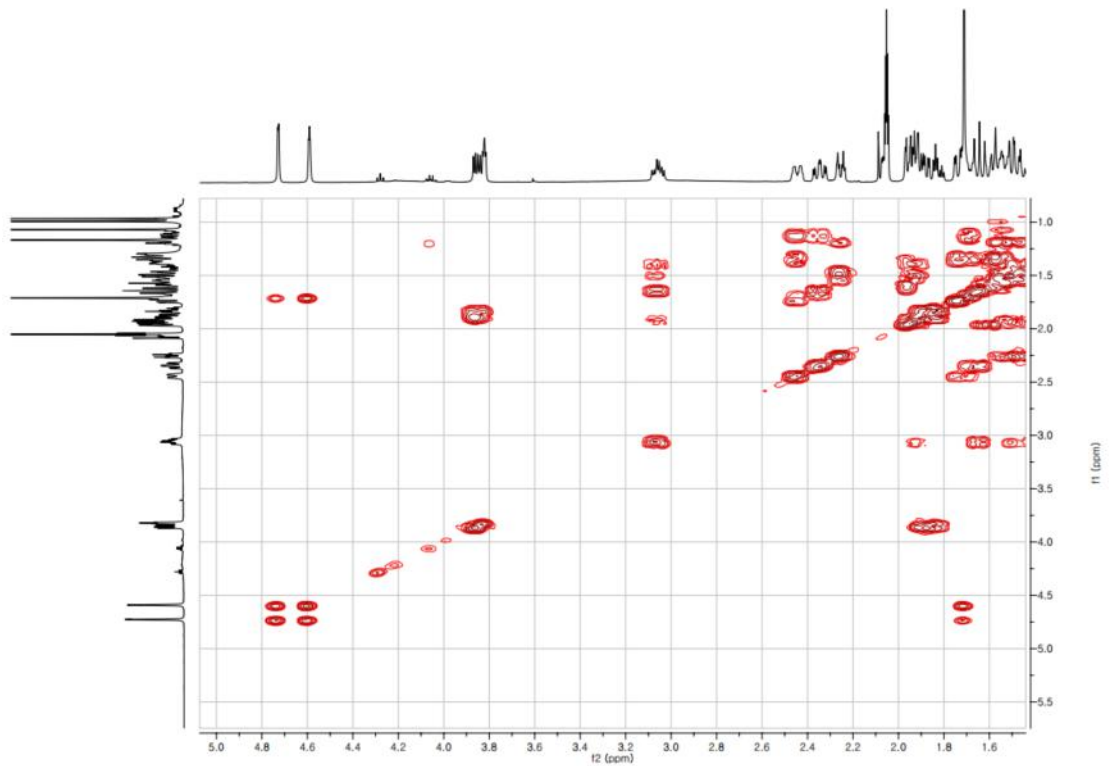

Figure S19. Expand  $^1\text{H}$ - $^1\text{H}$  COSY spectrum of acangraciligenin S in acetone- $d_6$

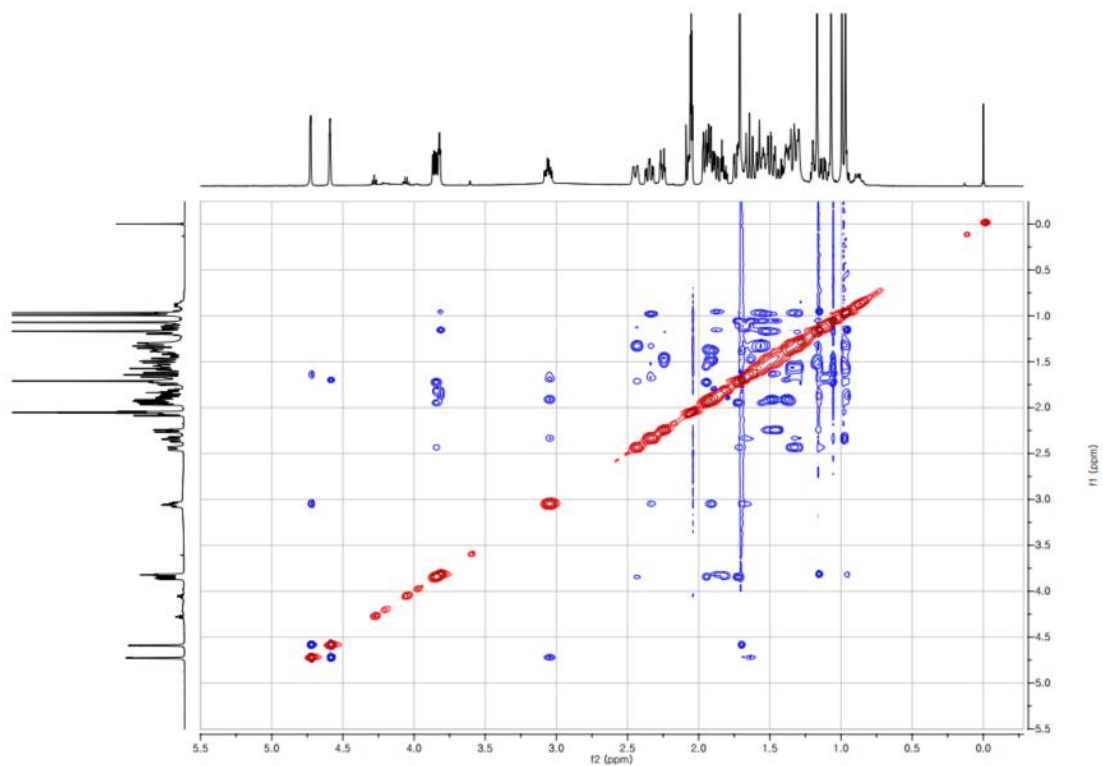

Figure S20. NOESY spectrum of acangraciligenin S in acetone- $d_6$

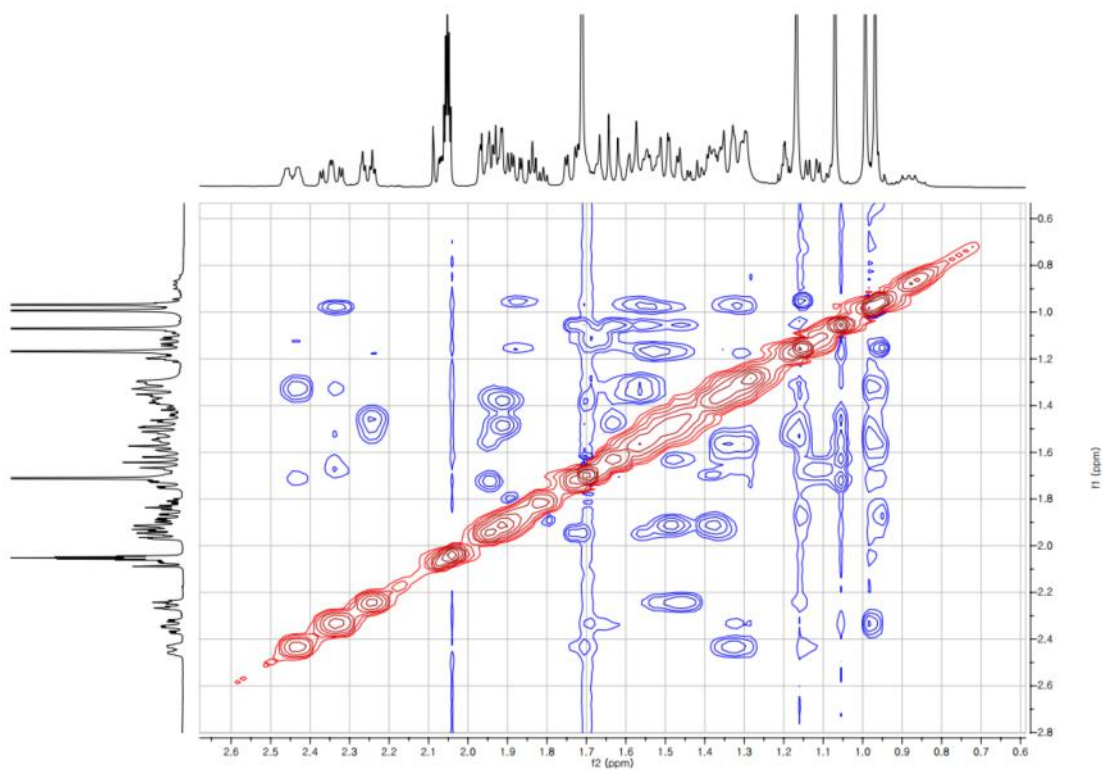

Figure S21. Expand NOESY spectrum of acangraciligenin S in acetone- $d_6$



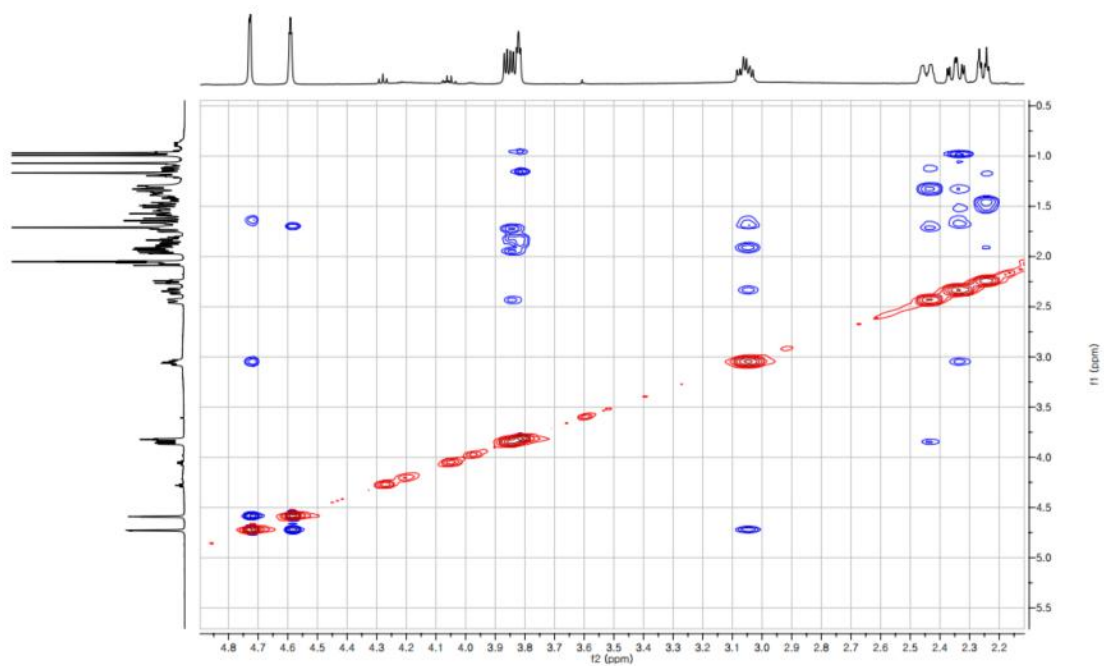

Figure S22. Expand NOESY spectrum of acangraciligenin S in acetone- $d_6$

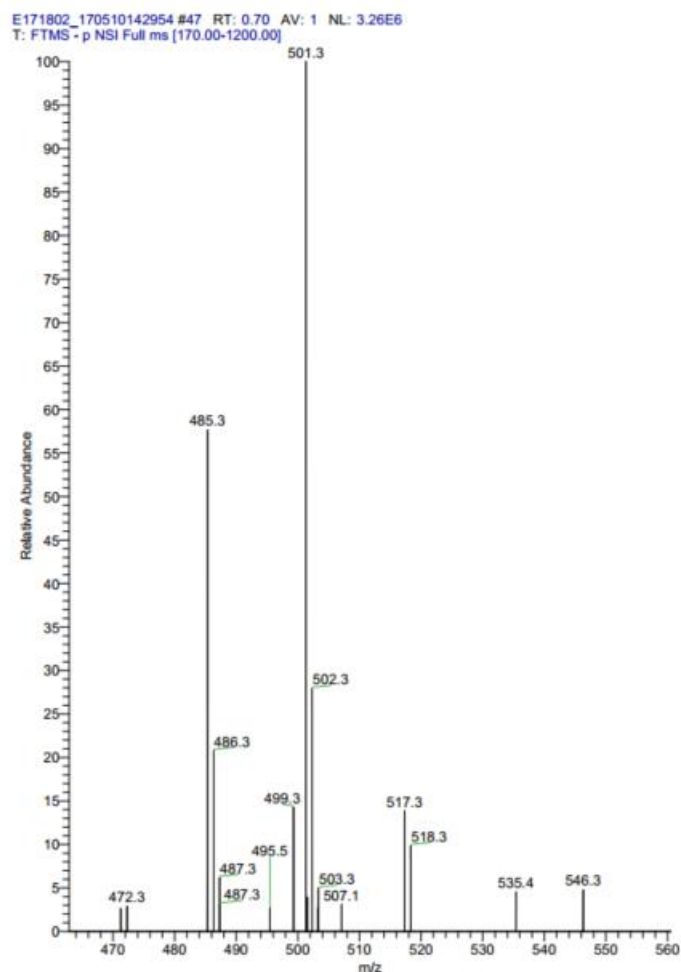

Figure S23. ESIMS spectrum of acangraciligenin S

National Center for Organic Mass Spectrometry in Shanghai  
Shanghai Institute of Organic Chemistry  
Chinese Academic of Sciences  
High Resolution MS DATA REPORT

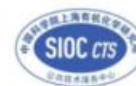

Instrument: Thermo Fisher Scientific LTQ FTICR

Card Serial Number : E171801

Sample Serial Number: EA-1

Operator : ZHUFJ Date: 2017/05/11

Operation Mode: DART Negative

Elemental composition search on mass 501.32

m/z= 496.32-506.32

| m/z      | Theo. Mass | Delta (ppm) | RDB equiv. | Composition                                                   |
|----------|------------|-------------|------------|---------------------------------------------------------------|
| 501.3221 | 501.3222   | -0.20       | 8.5        | C <sub>30</sub> H <sub>45</sub> O <sub>6</sub>                |
|          | 501.3181   | 7.82        | 4.5        | C <sub>25</sub> H <sub>45</sub> O <sub>8</sub> N <sub>2</sub> |

Figure S24. HRESIMS spectrum of acangraciligenin S

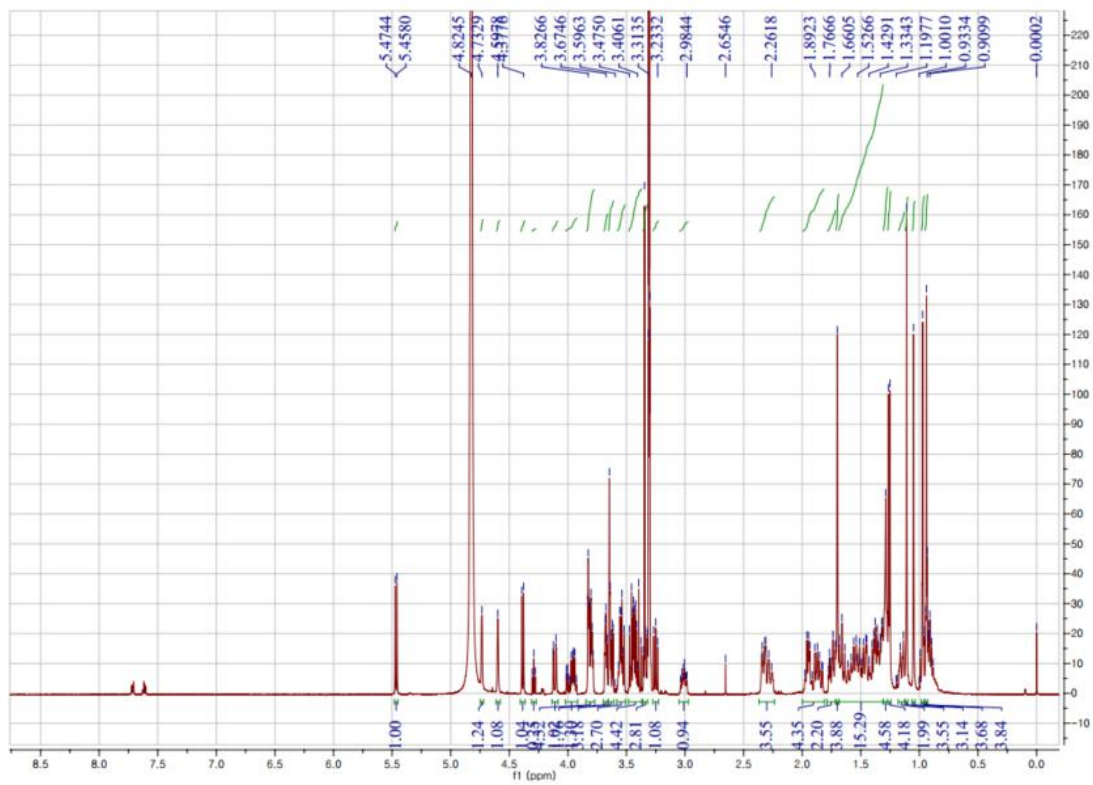

Figure S25.  $^1\text{H}$  NMR spectrum of acangraciliside S in methanol- $d_4$

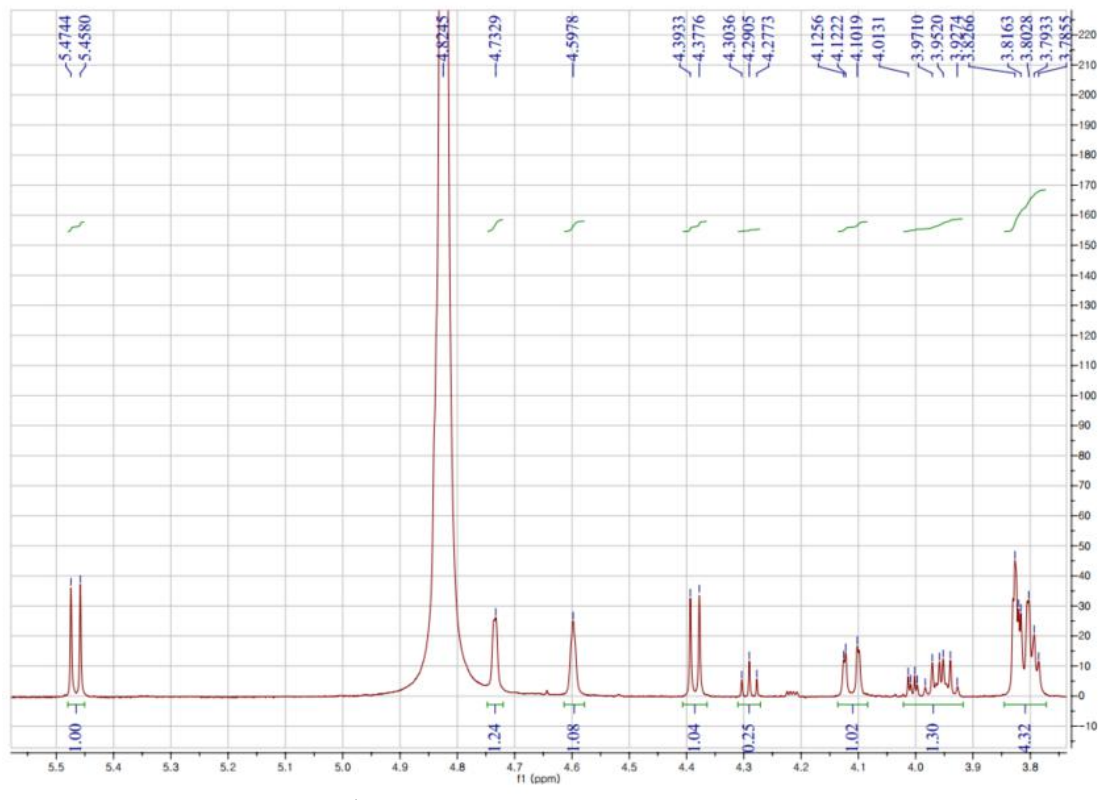

Figure S26. Expand  $^1\text{H}$  NMR spectrum of acangraciliside S in methanol- $d_4$

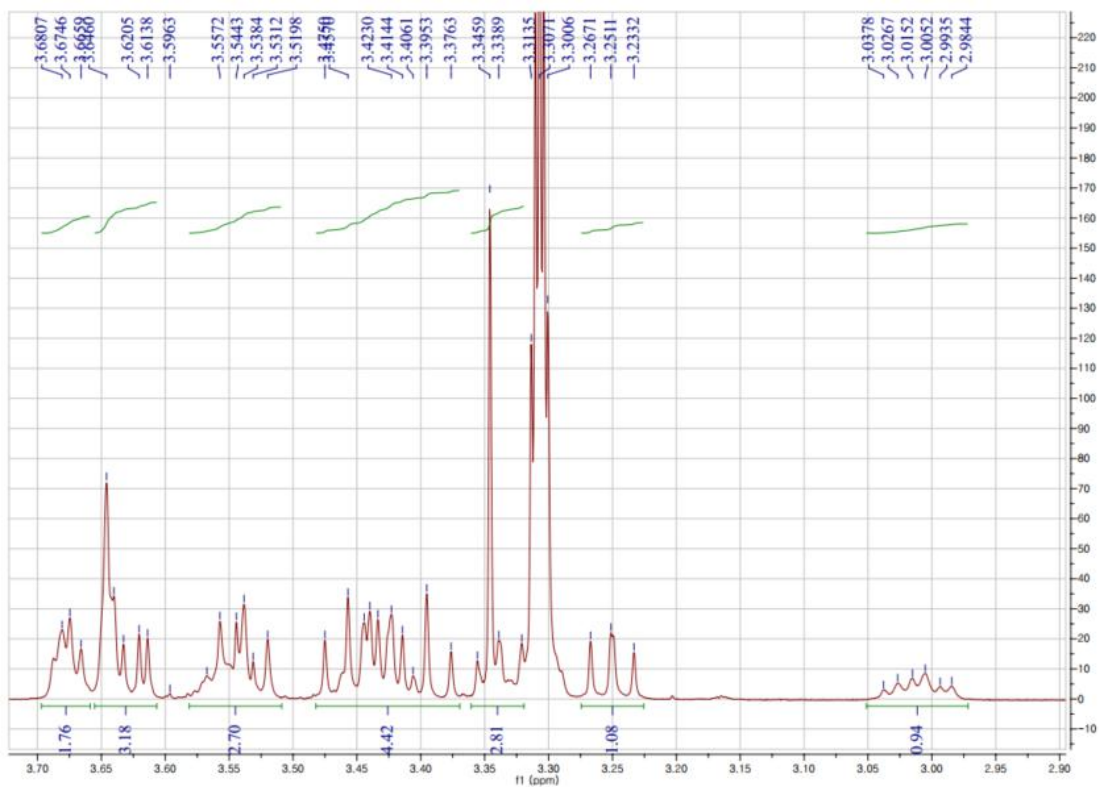

Figure S27. Expand  $^1\text{H}$  NMR spectrum of acangraciliside S in methanol- $d_4$

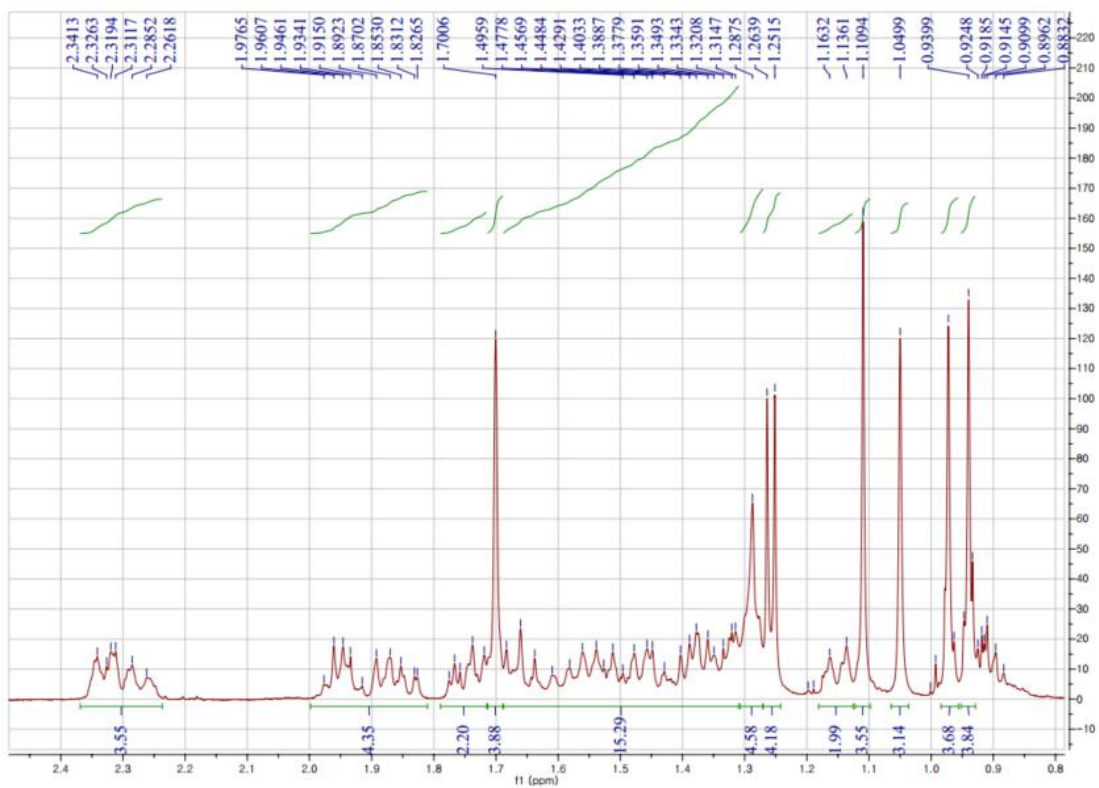

Figure S28. Expand  $^1\text{H}$  NMR spectrum of acangraciliside S in methanol- $d_4$

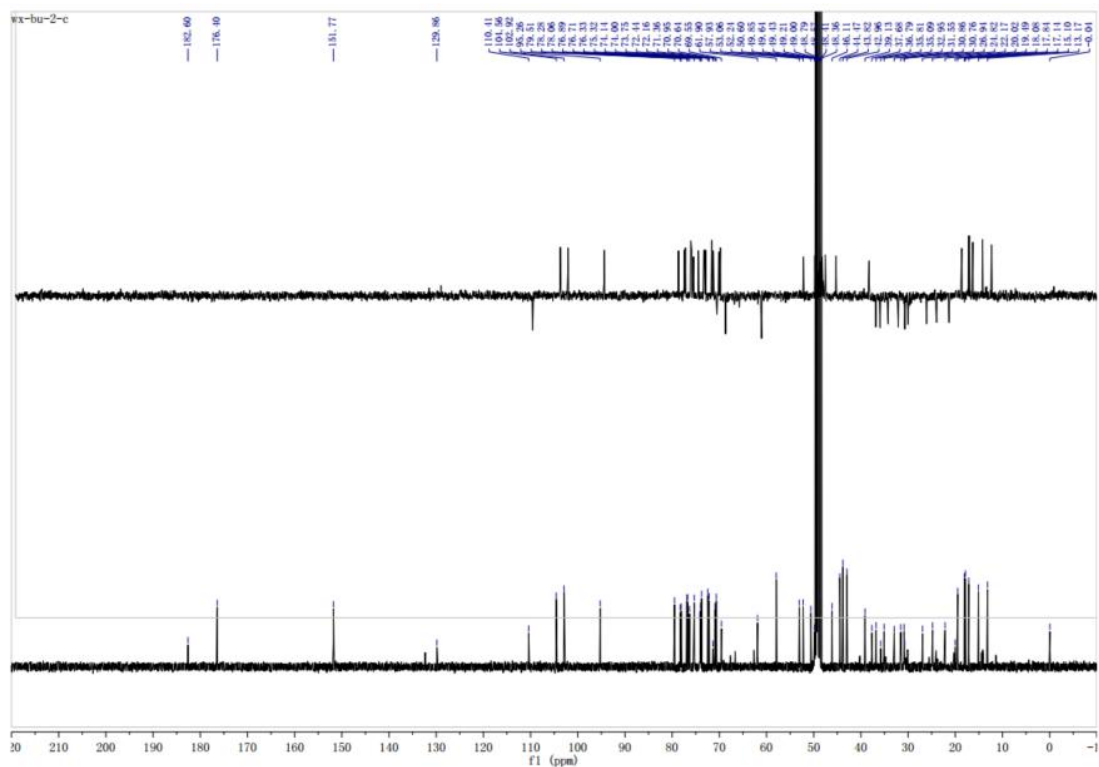

Figure S29.  $^{13}\text{C}$  NMR spectrum of acangraciliside S in methanol- $d_4$

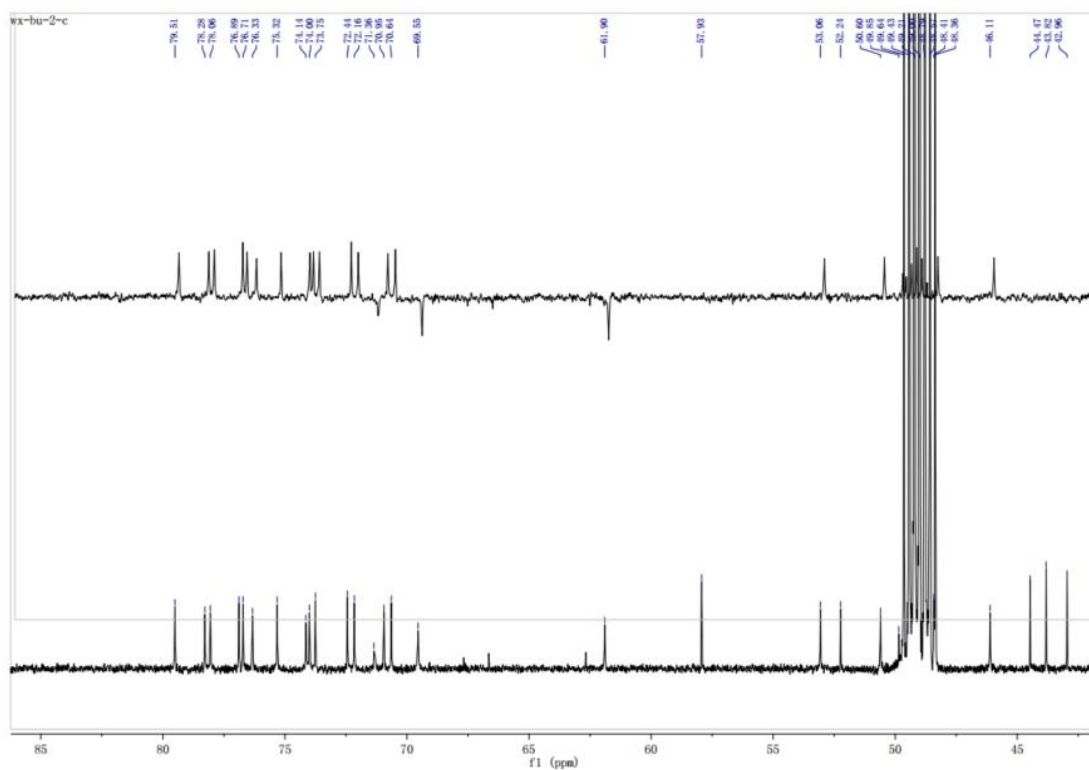

Figure S30. Expand  $^{13}\text{C}$  NMR spectrum of acangraciliside S in methanol- $d_4$

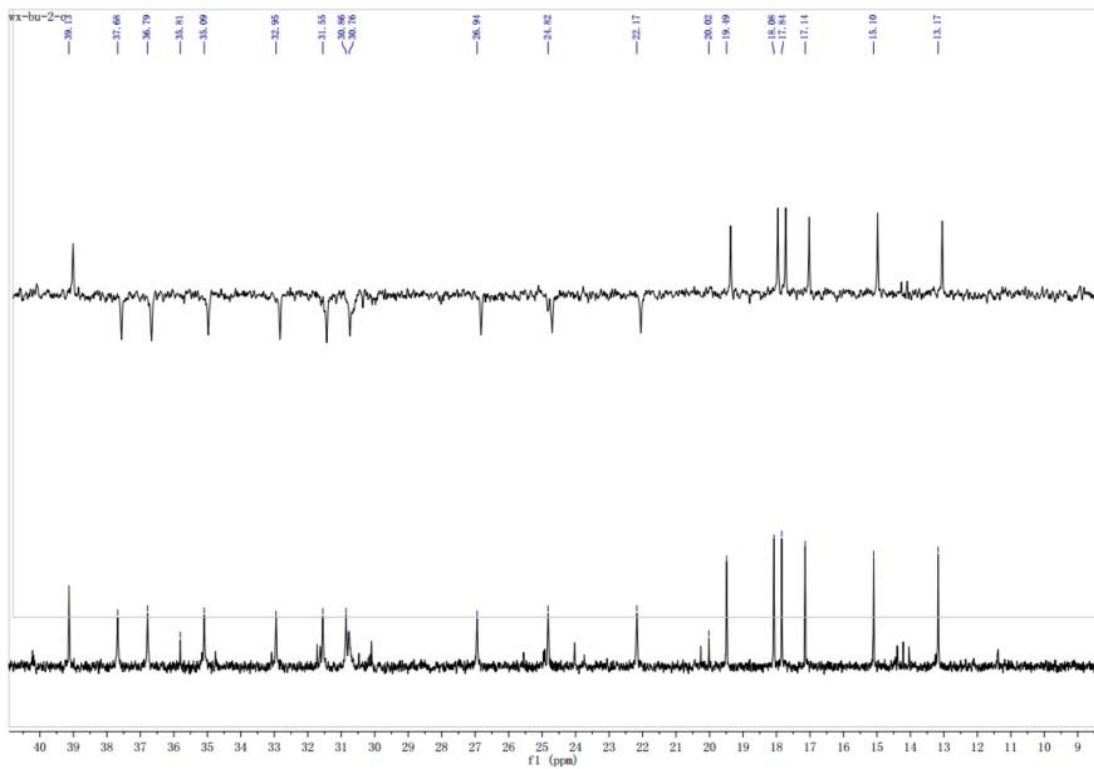

Figure S31. Expand  $^{13}\text{C}$  NMR spectrum of acangraciliside S in methanol- $d_4$

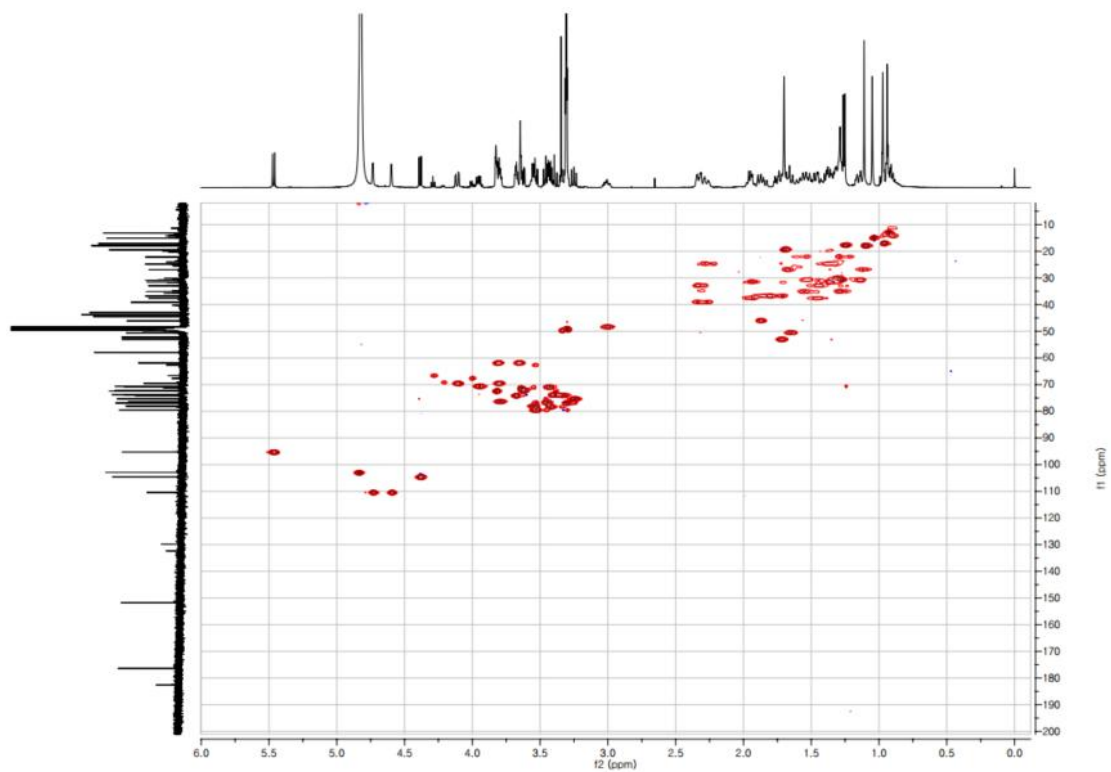

Figure S32. HSQC spectrum of acangraciliside S in methanol- $d_4$

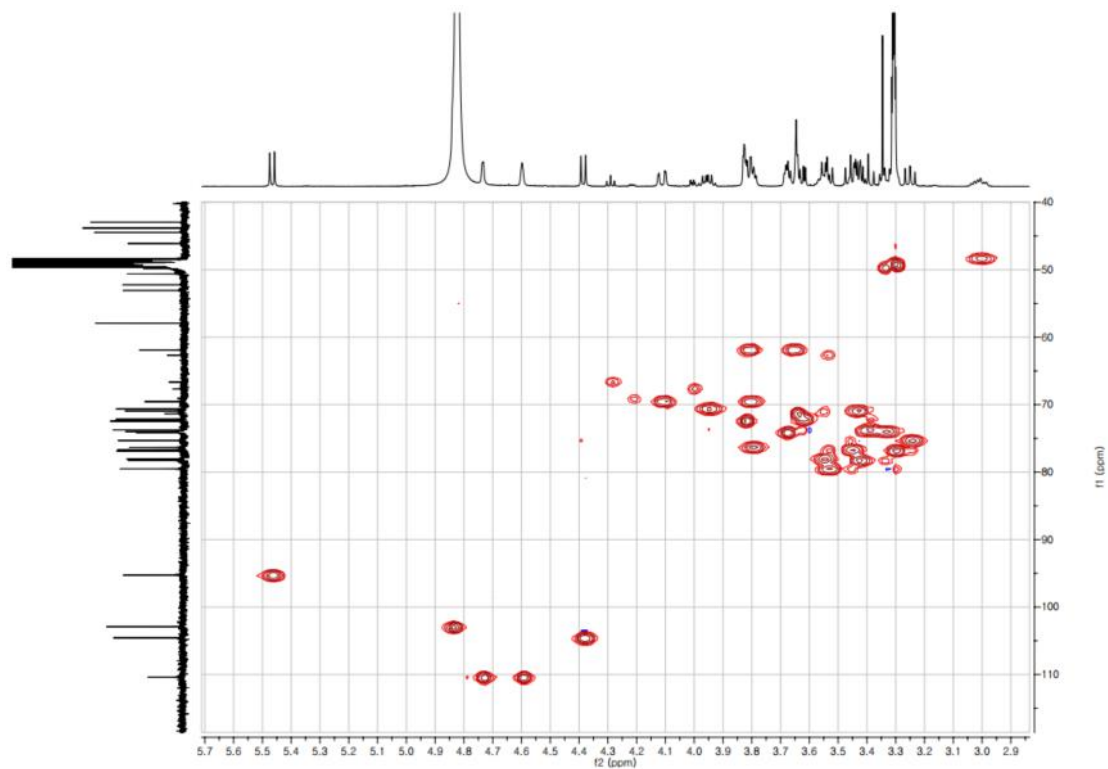

Figure S33. Expand HSQC spectrum of acangraciliside S in methanol- $d_4$

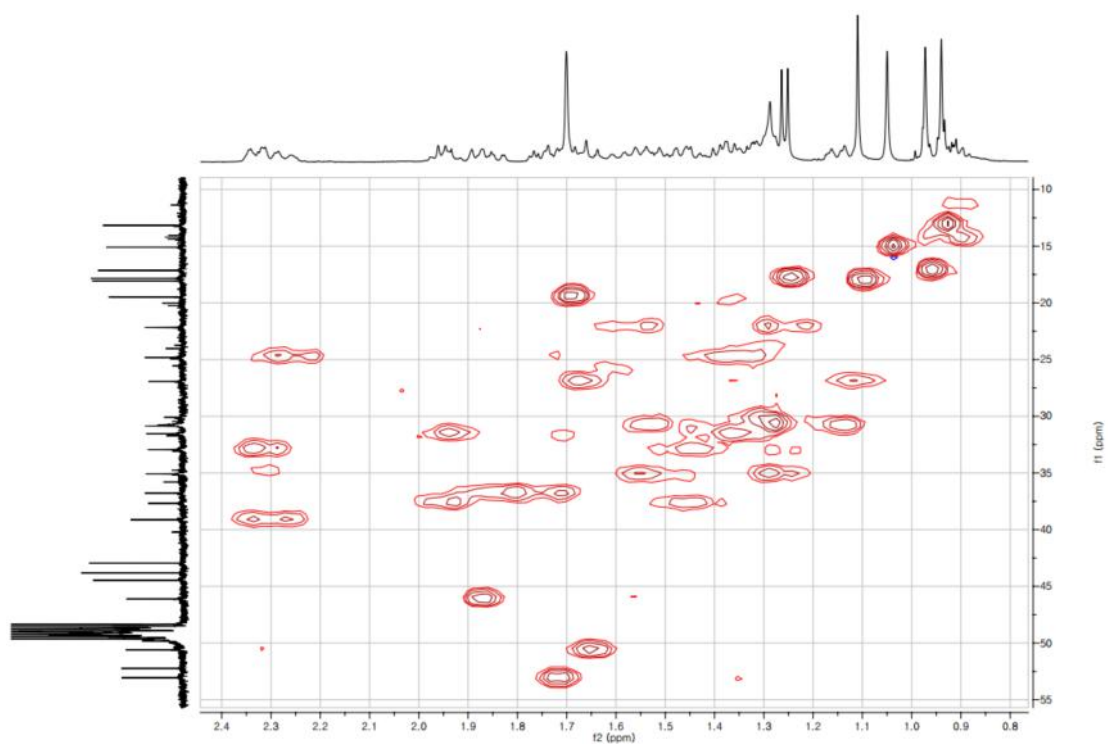

Figure S34. Expand HSQC spectrum of acangraciliside S in methanol- $d_4$



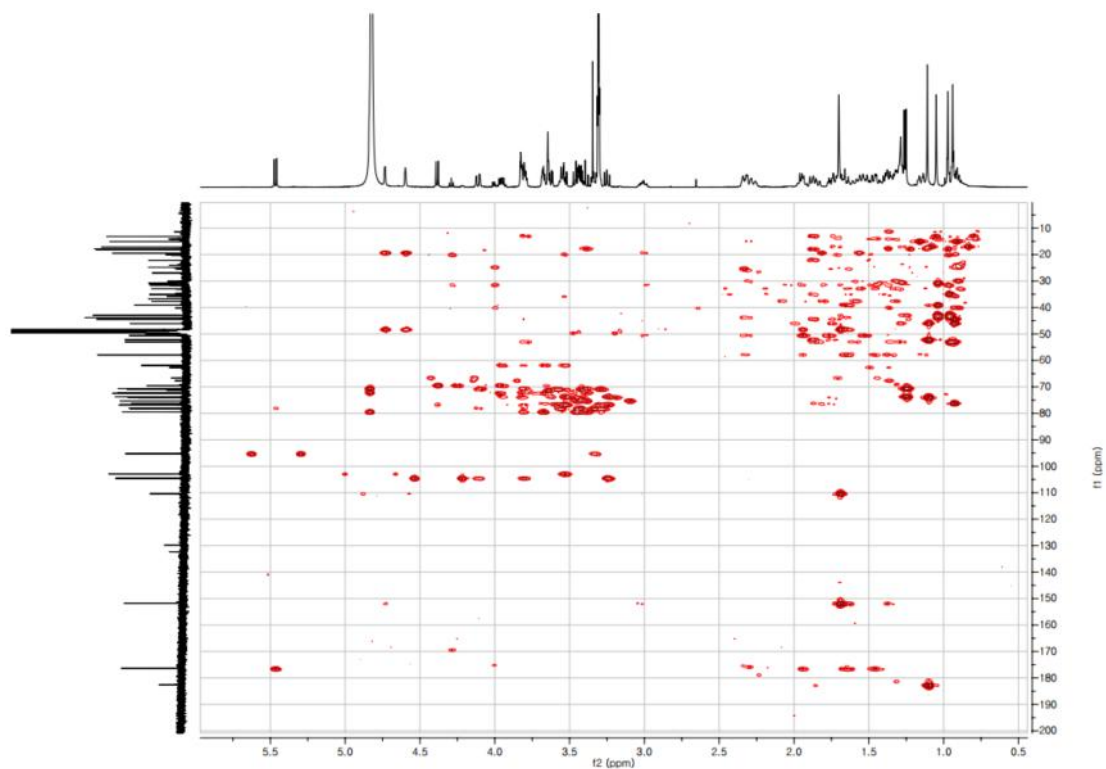

Figure S35. HMBC spectrum of acangraciliside S in methanol- $d_4$

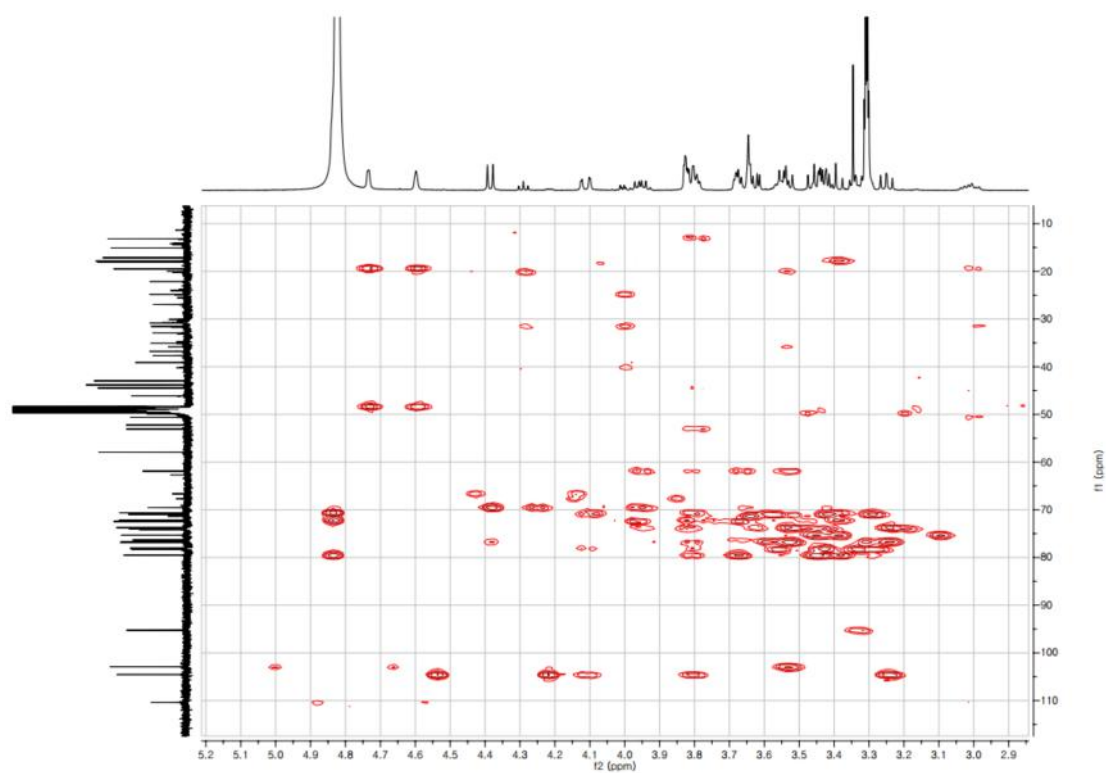

Figure S36. Expand HMBC spectrum of acangraciliside S in methanol- $d_4$

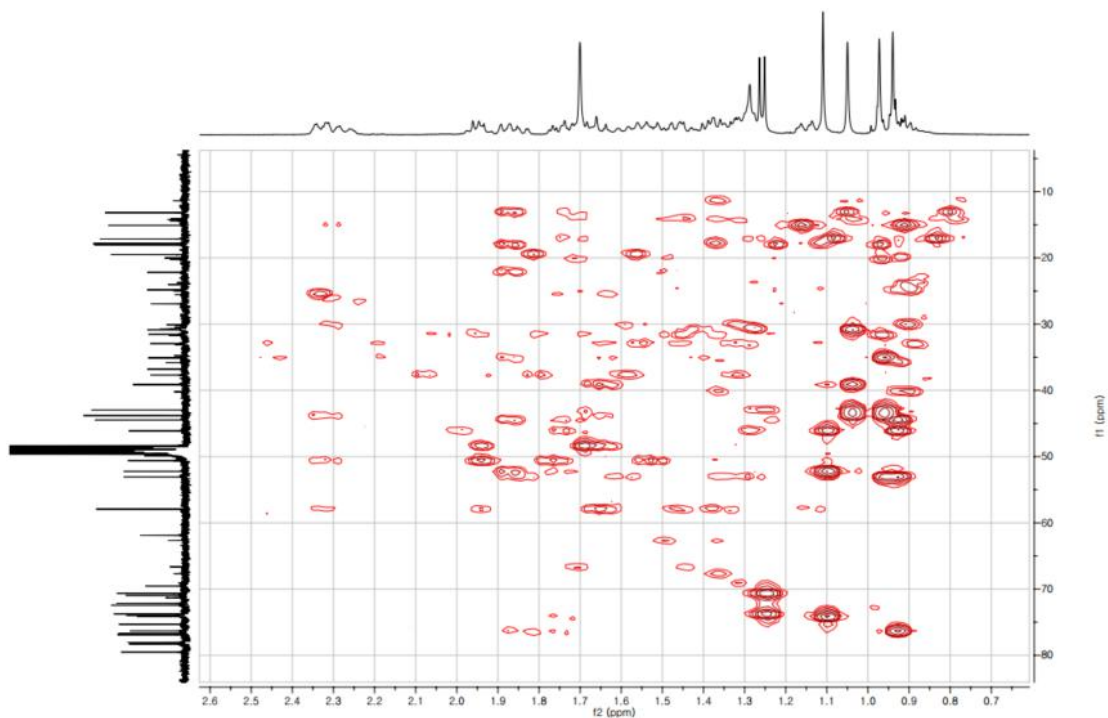

Figure S37. Expand HMBC spectrum of acangraciliside S in methanol- $d_4$

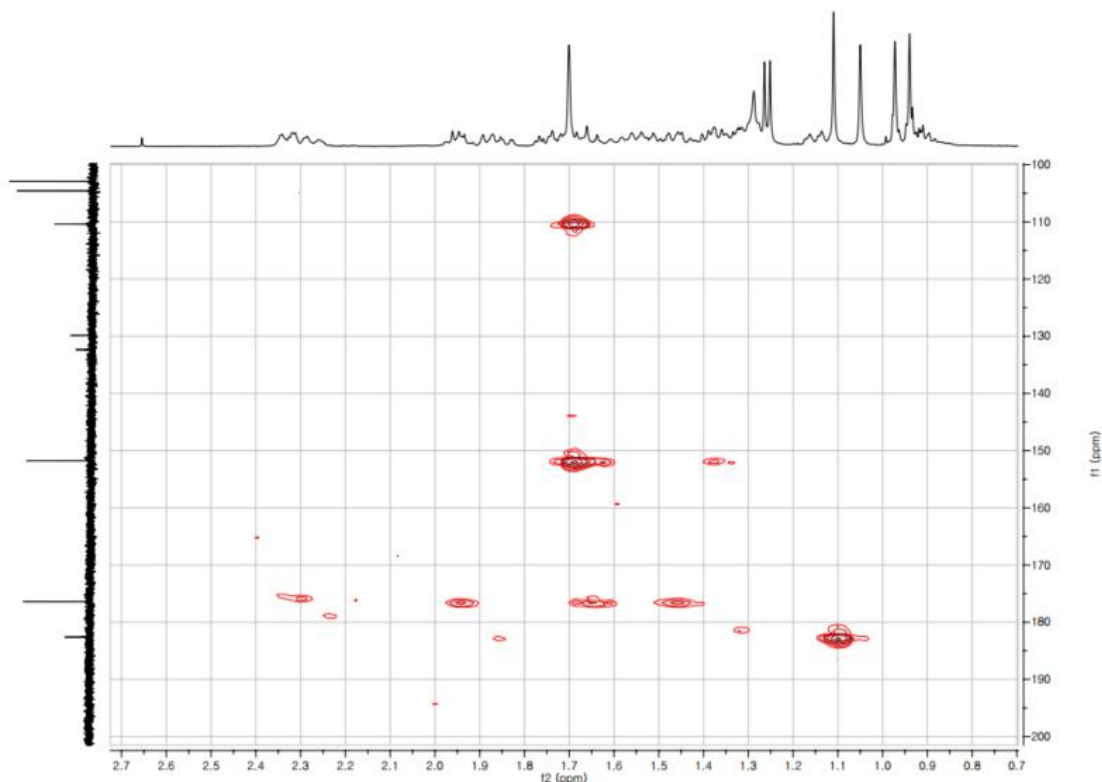

Figure S38. Expand HMBC spectrum of acangraciliside S in methanol- $d_4$

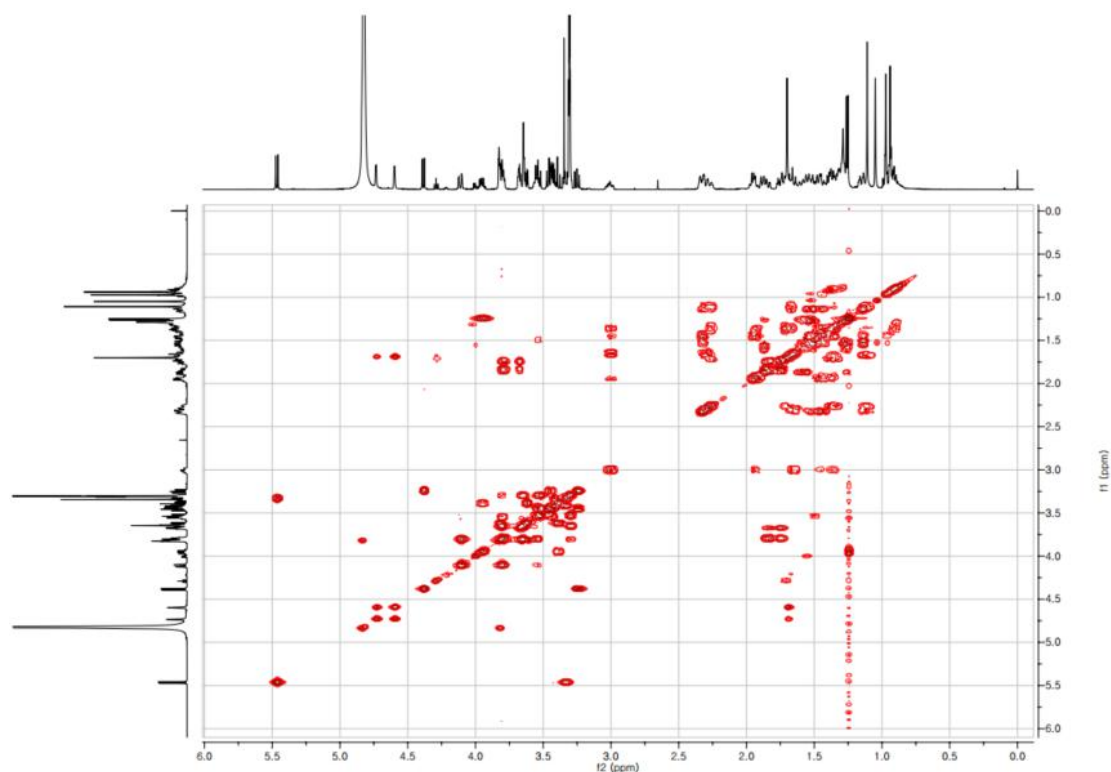

Figure S39.  $^1\text{H}$ - $^1\text{H}$  COSY spectrum of acangraciliside S in methanol- $d_4$

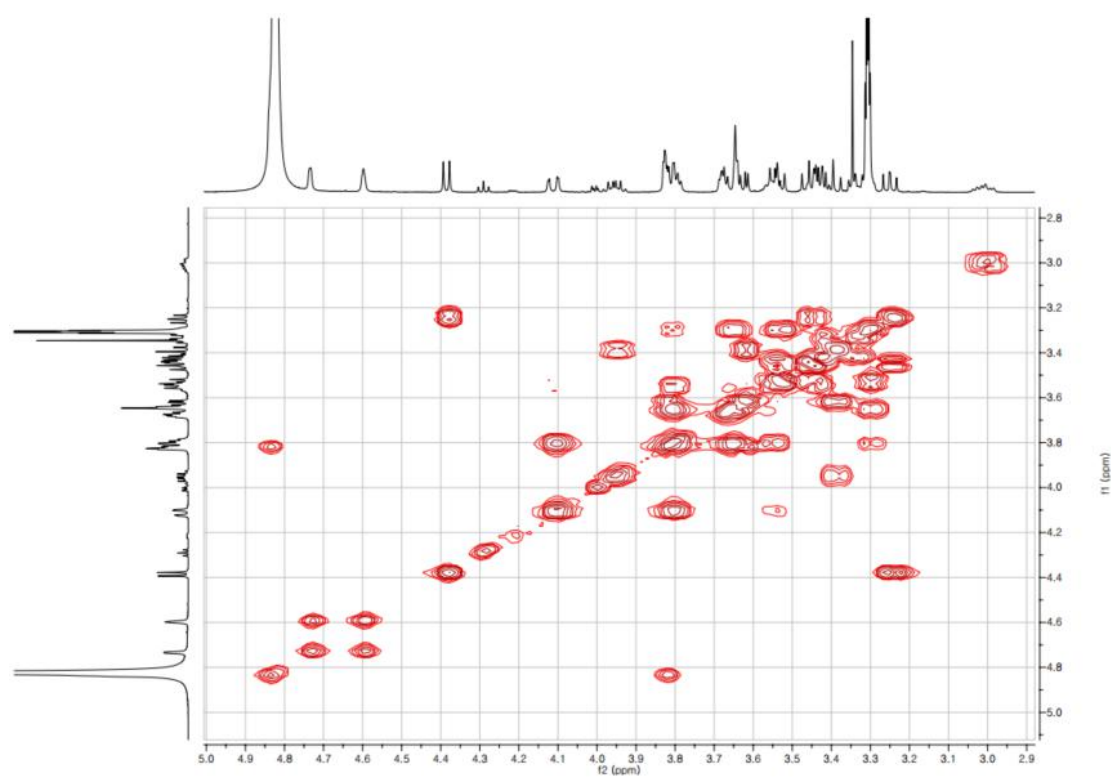

Figure S40. Expand  $^1\text{H}$ - $^1\text{H}$  COSY spectrum of acangraciliside S in methanol- $d_4$

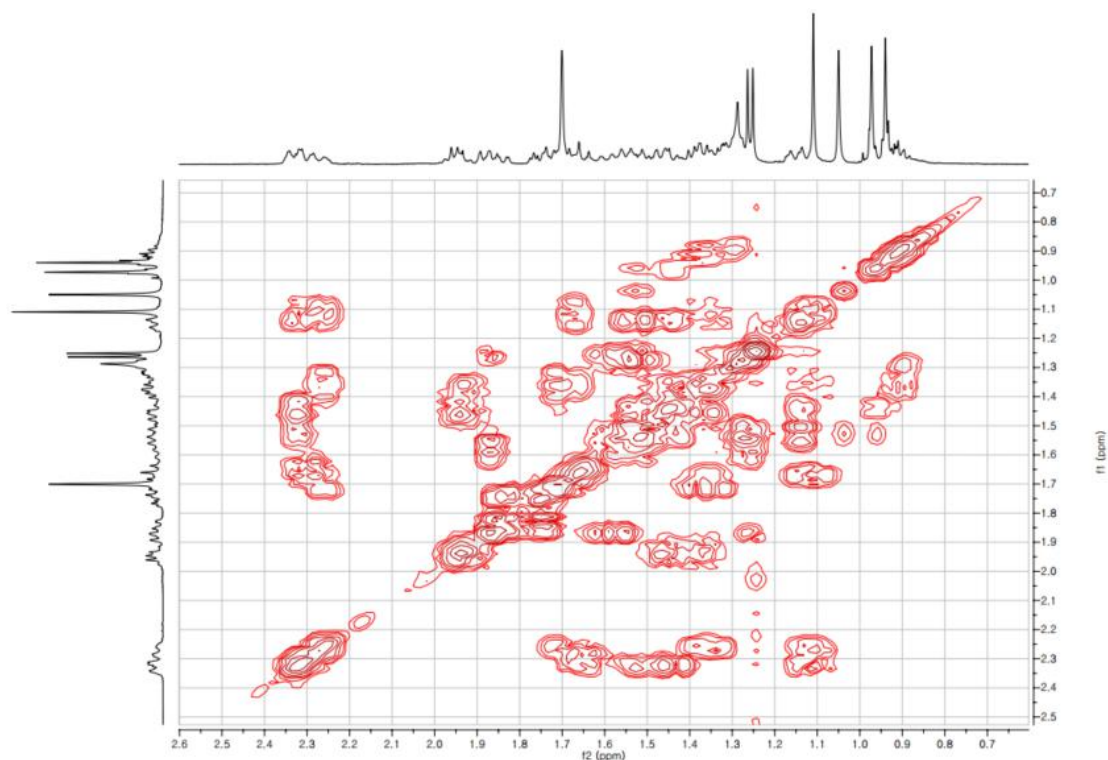

Figure S41. Expand  $^1\text{H}$ - $^1\text{H}$  COSY spectrum of acangraciliside S in methanol- $d_4$

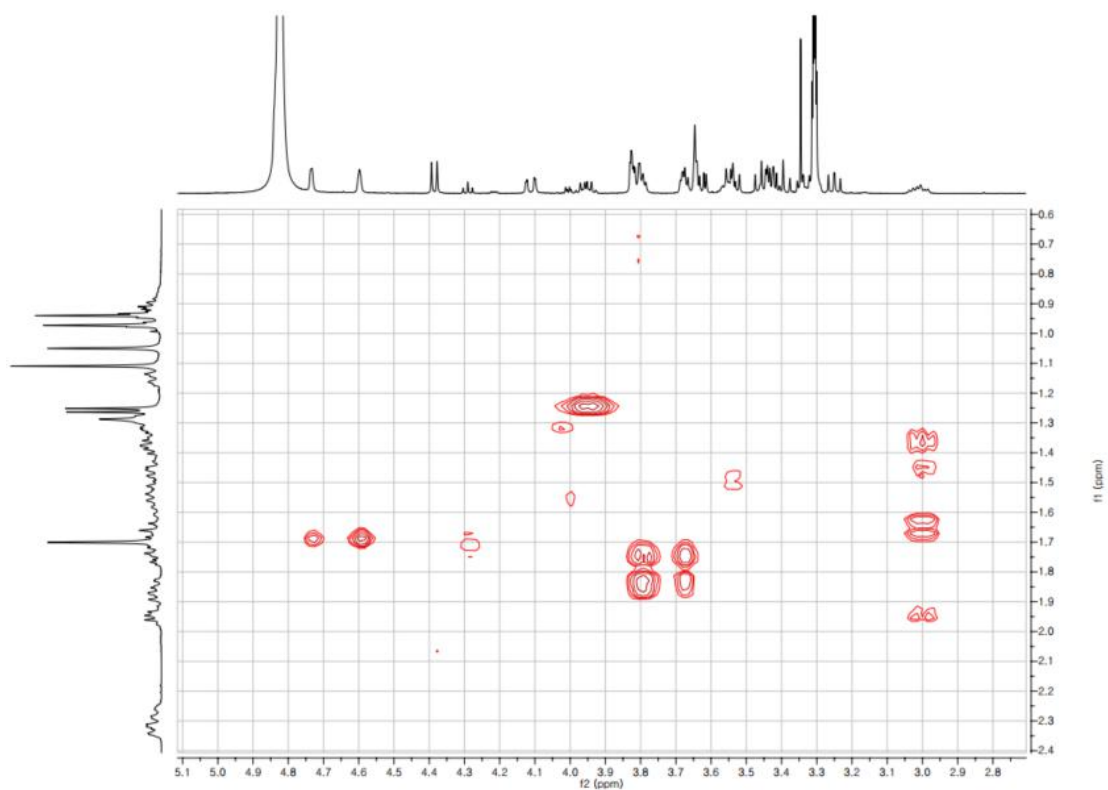

Figure S42. Expand  $^1\text{H}$ - $^1\text{H}$  COSY spectrum of acangraciliside S in methanol- $d_4$

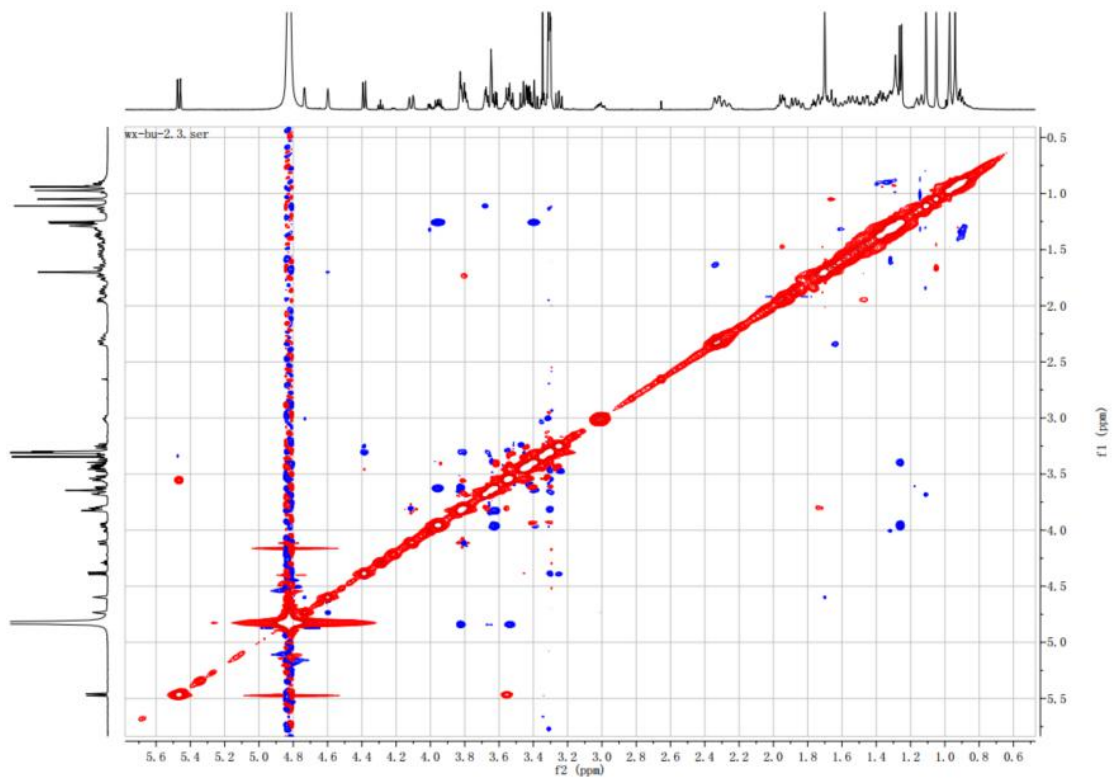

Figure S43. NOESY spectrum of acangraciliside S in methanol- $d_4$

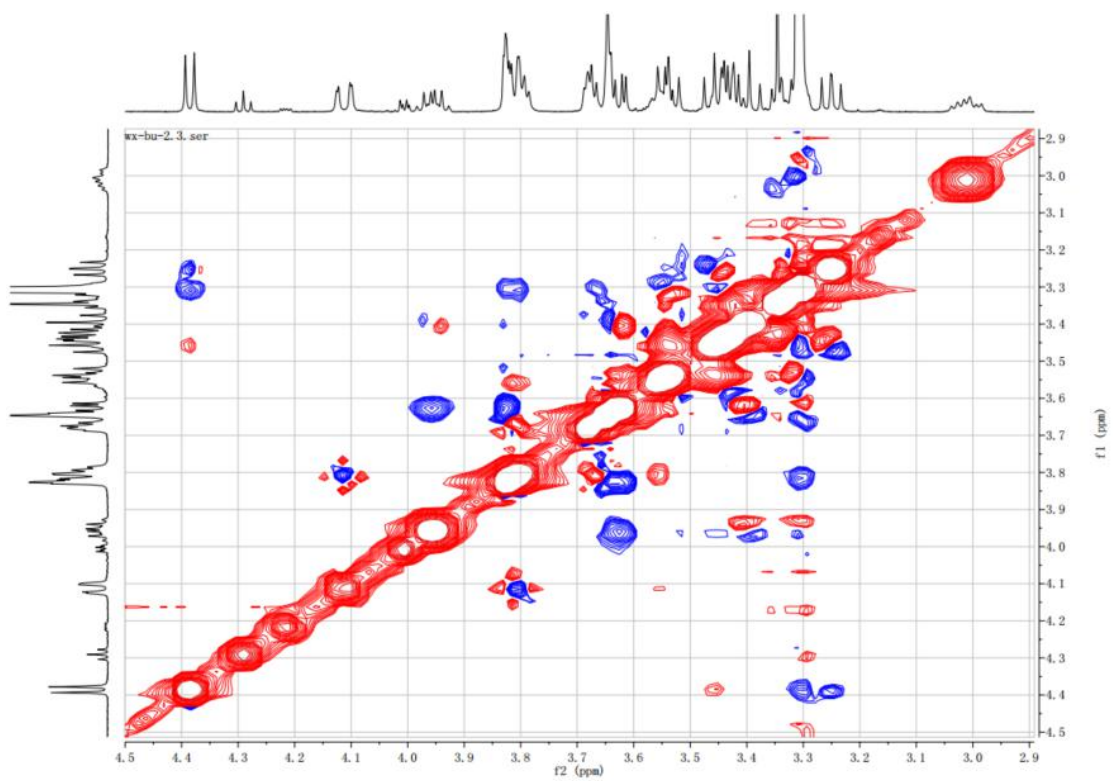

Figure S44. Expand NOESY spectrum of acangraciliside S in methanol- $d_4$

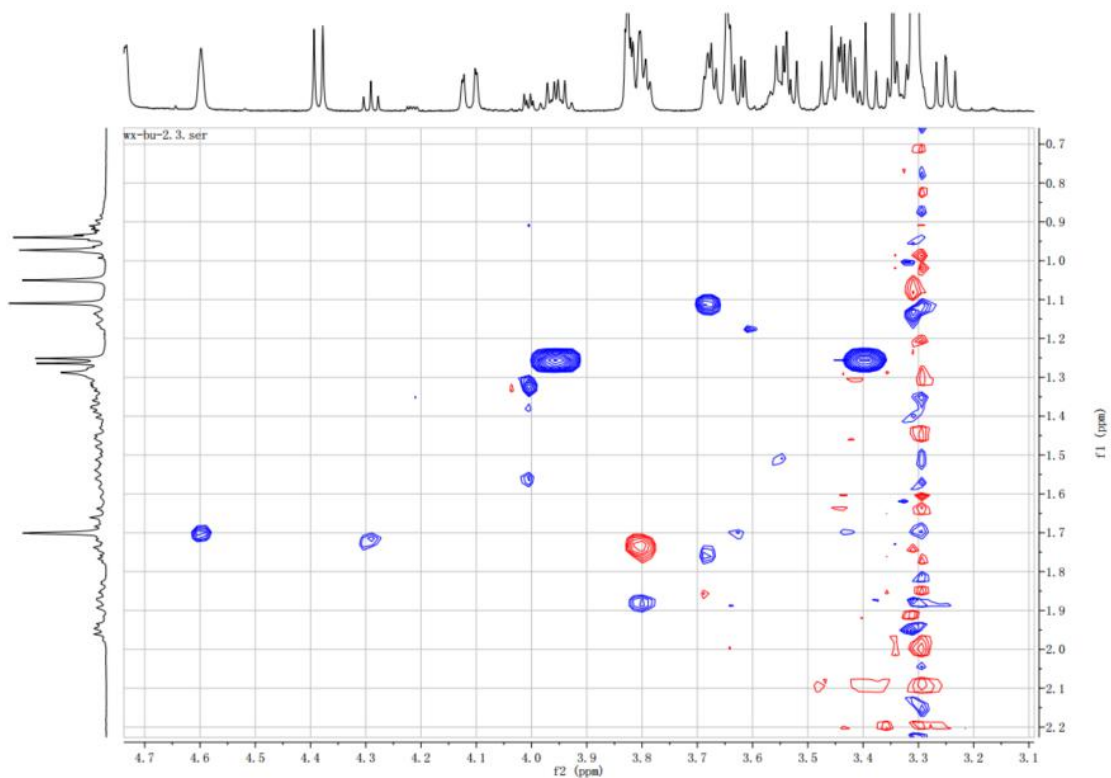

**Figure S45.** Expand NOESY spectrum of acangraciliside S in methanol- $d_4$



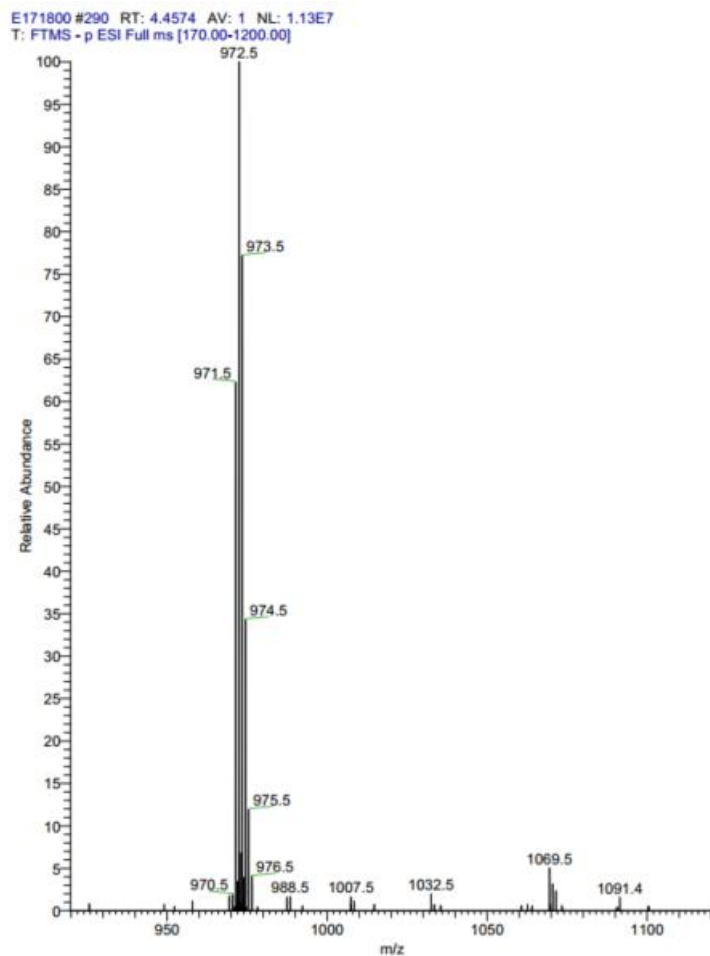

Figure S46. ESIMS spectrum of acangracilside S

National Center for Organic Mass Spectrometry in Shanghai  
Shanghai Institute of Organic Chemistry  
Chinese Academic of Sciences  
High Resolution MS DATA REPORT

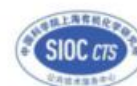

Instrument: Thermo Fisher Scientific LTQ FTICR

Card Serial Number : E171800

Sample Serial Number: 1

Operator : ZHUFJ Date: 2017/05/09

Operation Mode: ESI Negative

Elemental composition search on mass 971.49

m/z= 966.49-976.49

| m/z      | Theo. Mass | Delta (ppm) | RDB equiv. | Composition                                                    |
|----------|------------|-------------|------------|----------------------------------------------------------------|
| 971.4865 | 971.4857   | 0.84        | 11.5       | C <sub>48</sub> H <sub>75</sub> O <sub>20</sub>                |
|          | 971.4884   | -1.92       | 16.0       | C <sub>51</sub> H <sub>73</sub> O <sub>17</sub> N              |
|          | 971.4911   | -4.68       | 20.5       | C <sub>54</sub> H <sub>71</sub> O <sub>14</sub> N <sub>2</sub> |

Figure S47. HRESIMS spectrum of acangracilside S



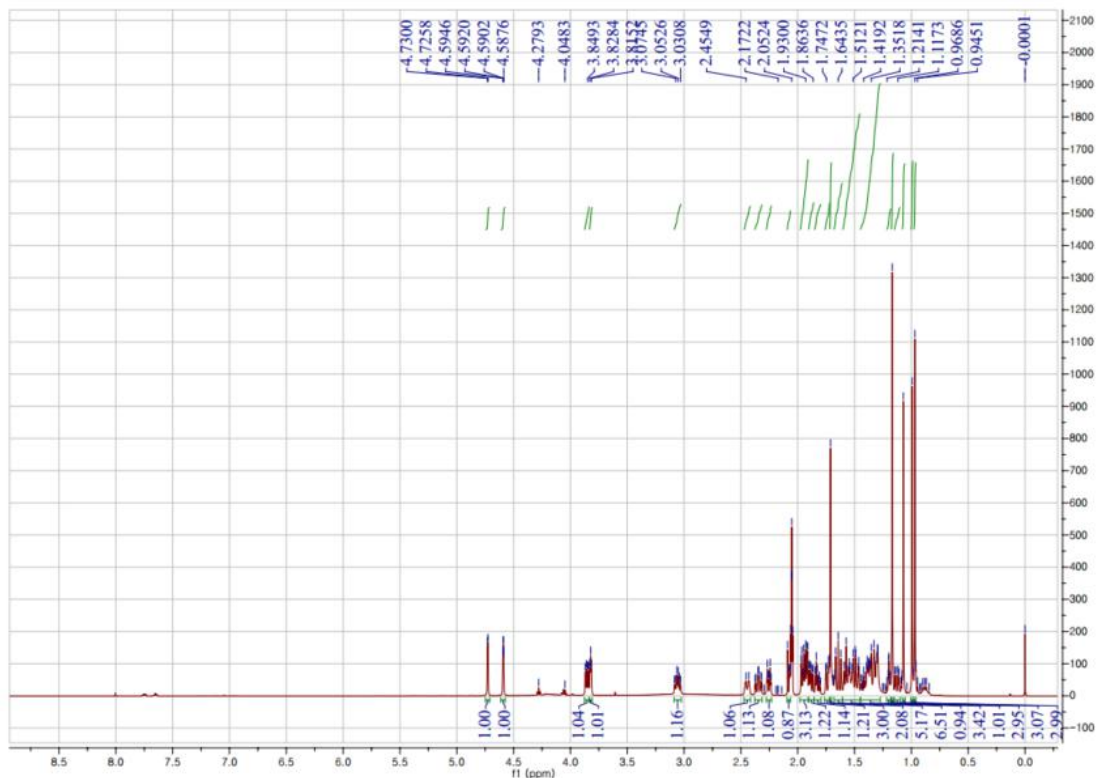

Figure S48.  $^1\text{H}$  NMR spectrum of **2a** in acetone- $d_6$

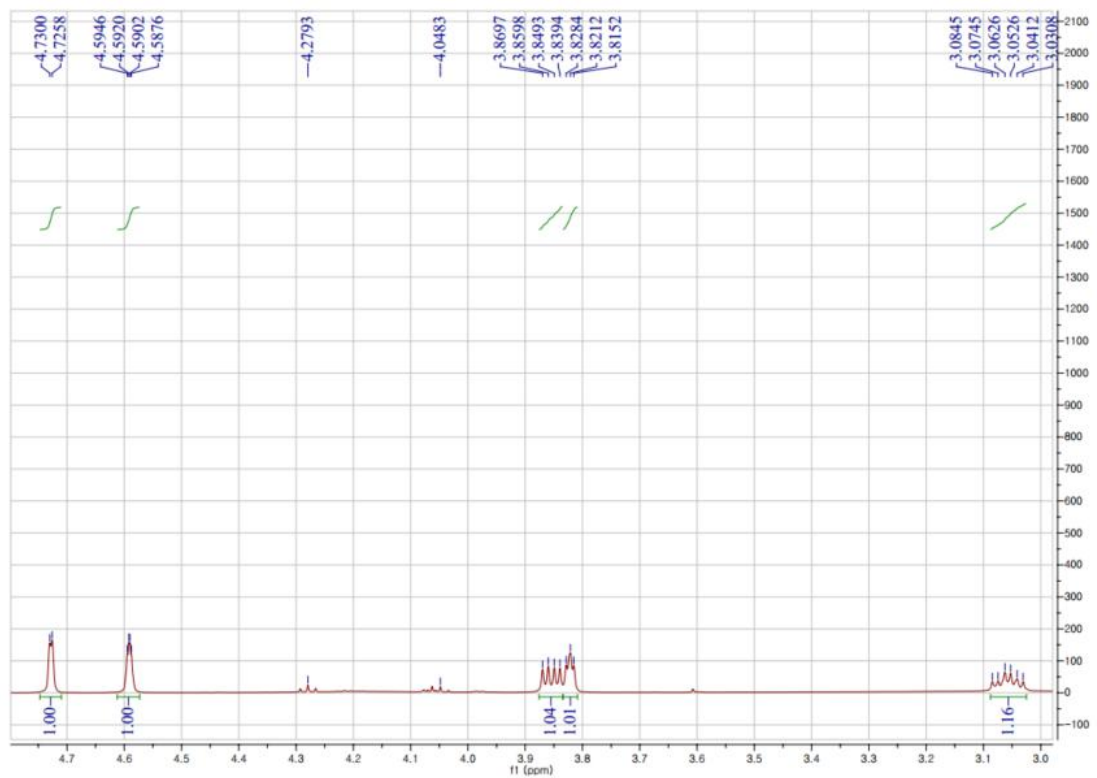

Figure S49. Expand  $^1\text{H}$  NMR spectrum of **2a** in acetone- $d_6$

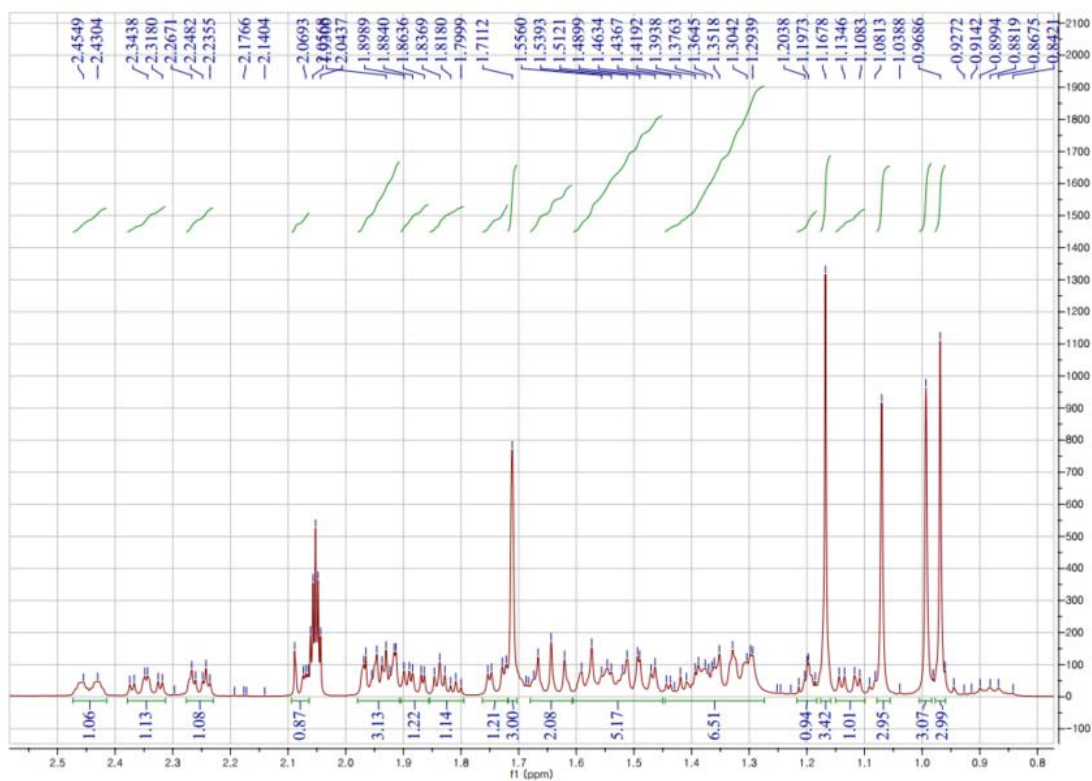

Figure S50. Expand  $^1\text{H}$  NMR spectrum of **2a** in acetone- $d_6$

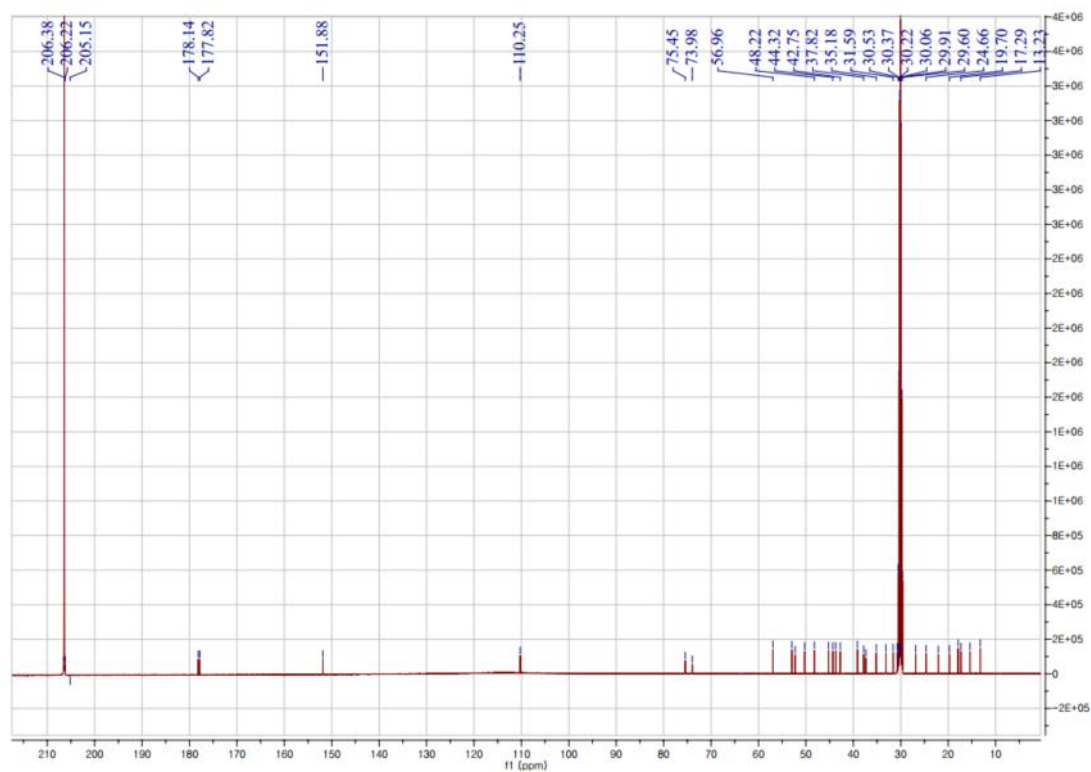

Figure S51.  $^{13}\text{C}$  NMR spectrum of **2a** in acetone- $d_6$

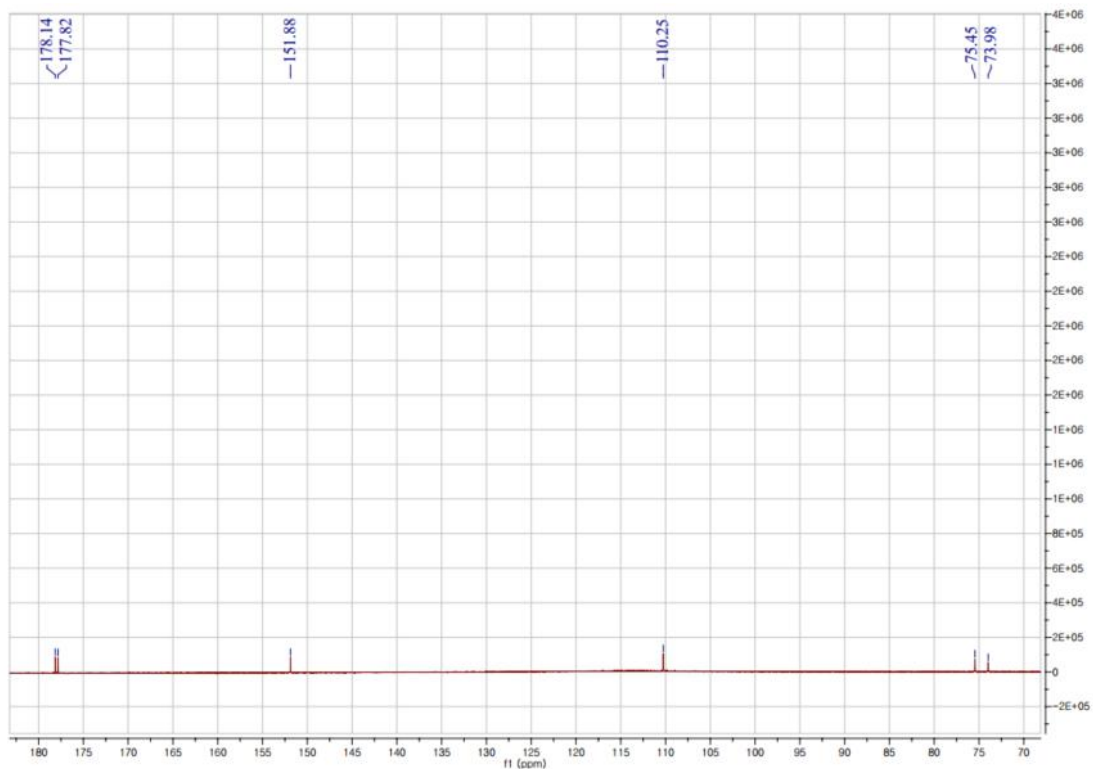

Figure S52. Expand  $^{13}\text{C}$  NMR spectrum of 2a in acetone- $d_6$

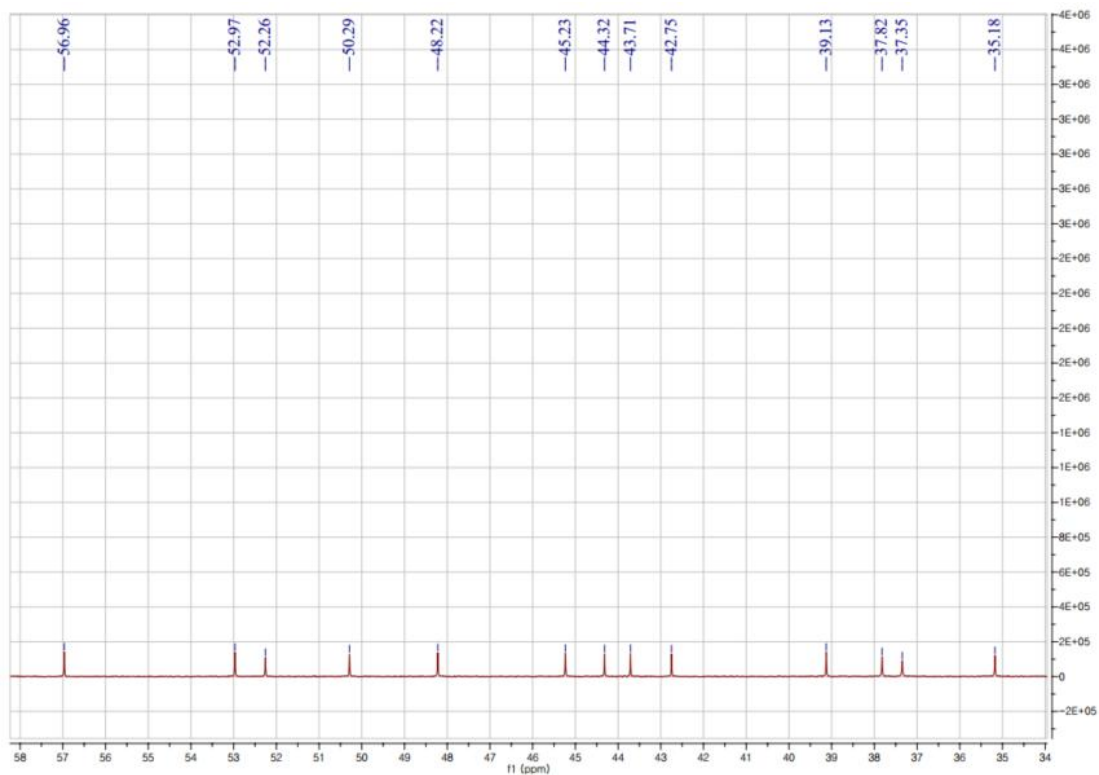

Figure S53. Expand  $^{13}\text{C}$  NMR spectrum of 2a in acetone- $d_6$

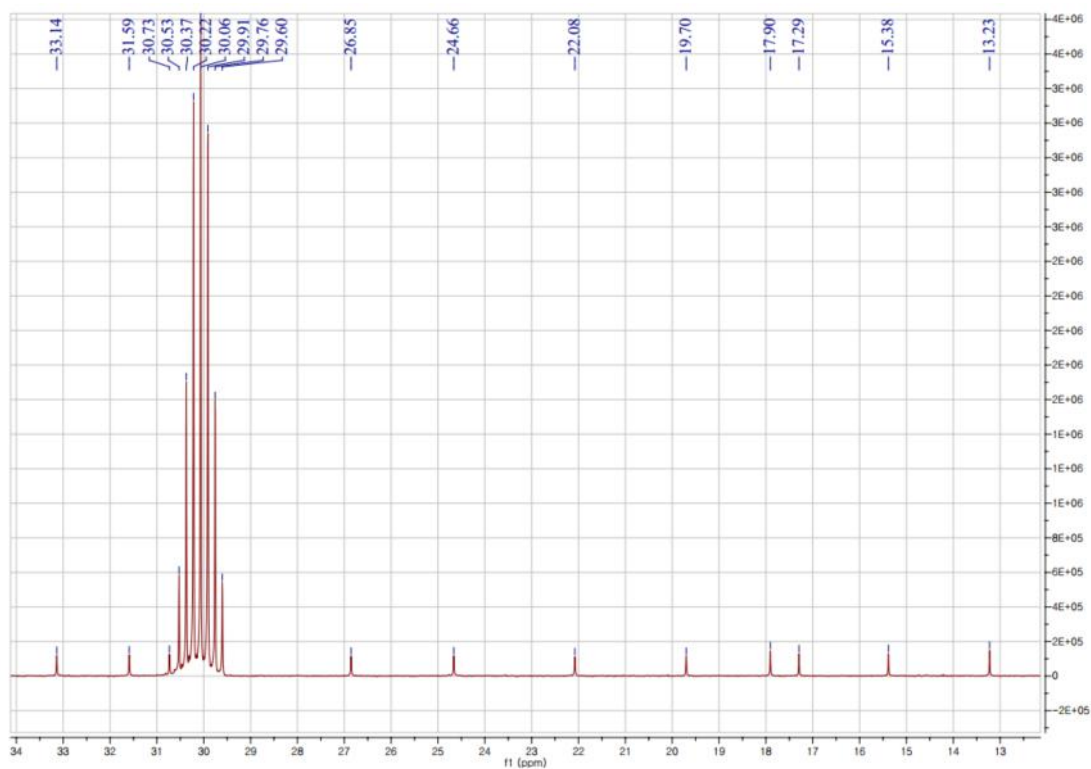

Figure S54. Expand  $^{13}\text{C}$  NMR spectrum of **2a** in acetone- $d_6$

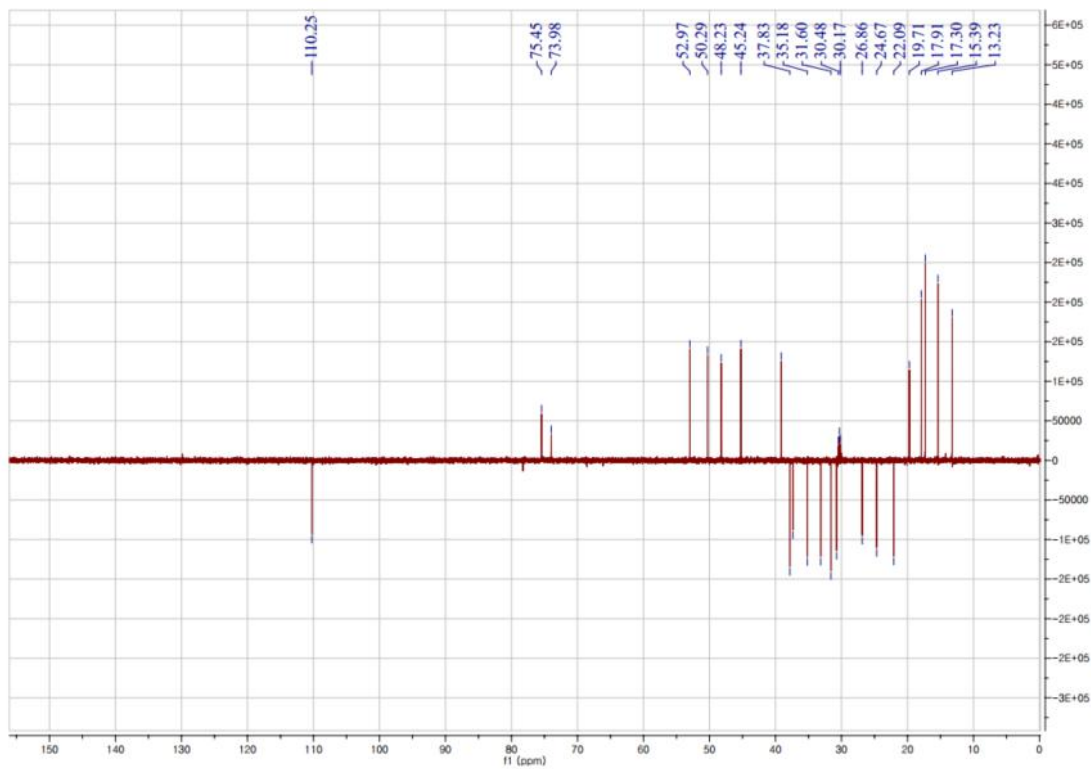

Figure S55. DEPT spectrum of **2a** in acetone- $d_6$

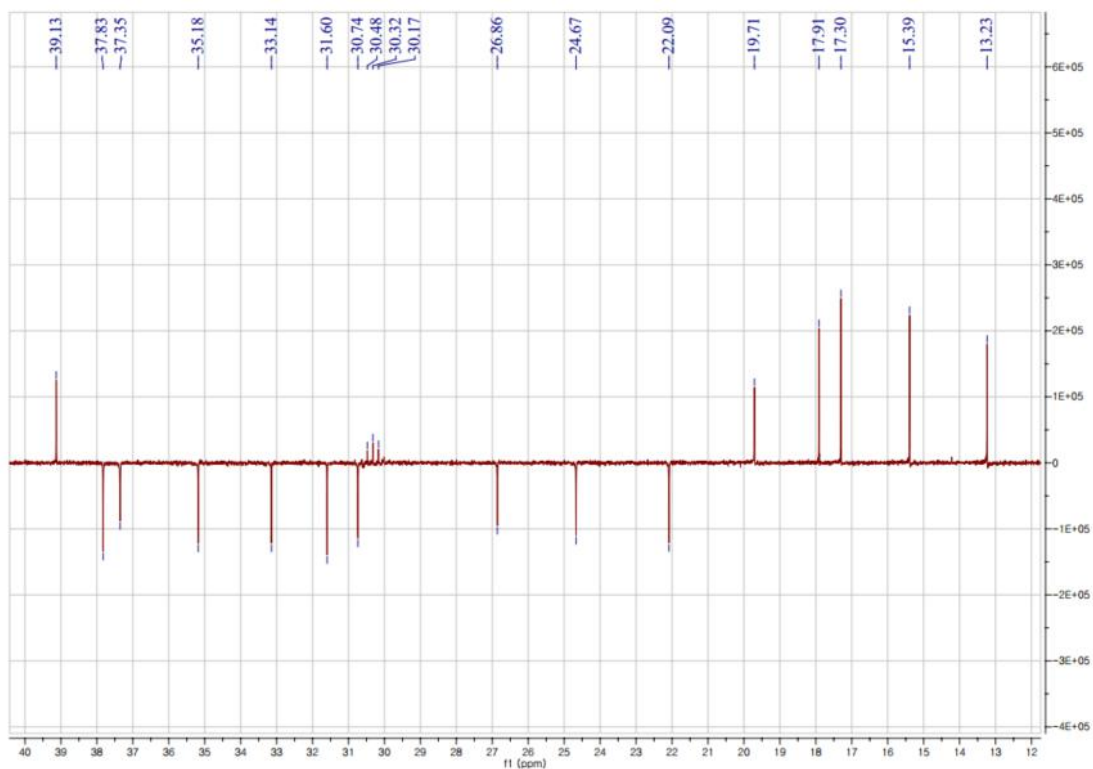

Figure S56. Expand DEPT spectrum of 2a in acetone-*d*<sub>6</sub>

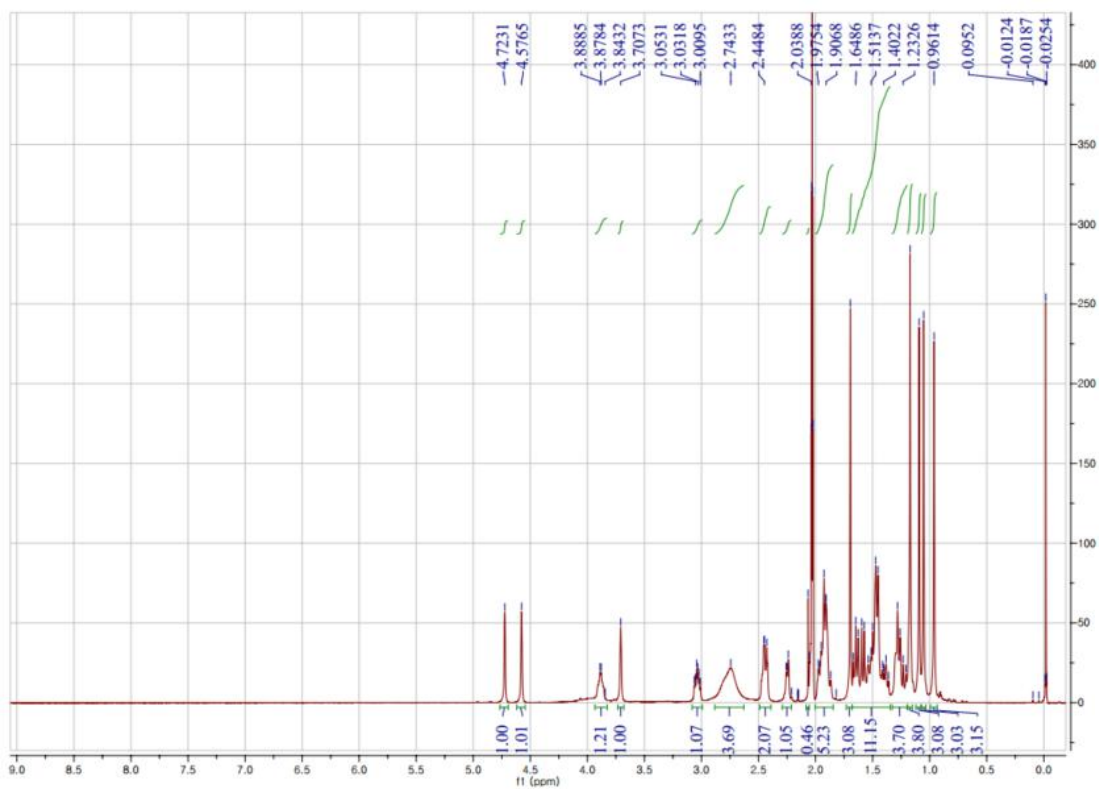

Figure S57. <sup>1</sup>H NMR spectrum of 3α,11α-dihydroxy-lup-20(29)-en-23,28-dioic acid in acetone-*d*<sub>6</sub>

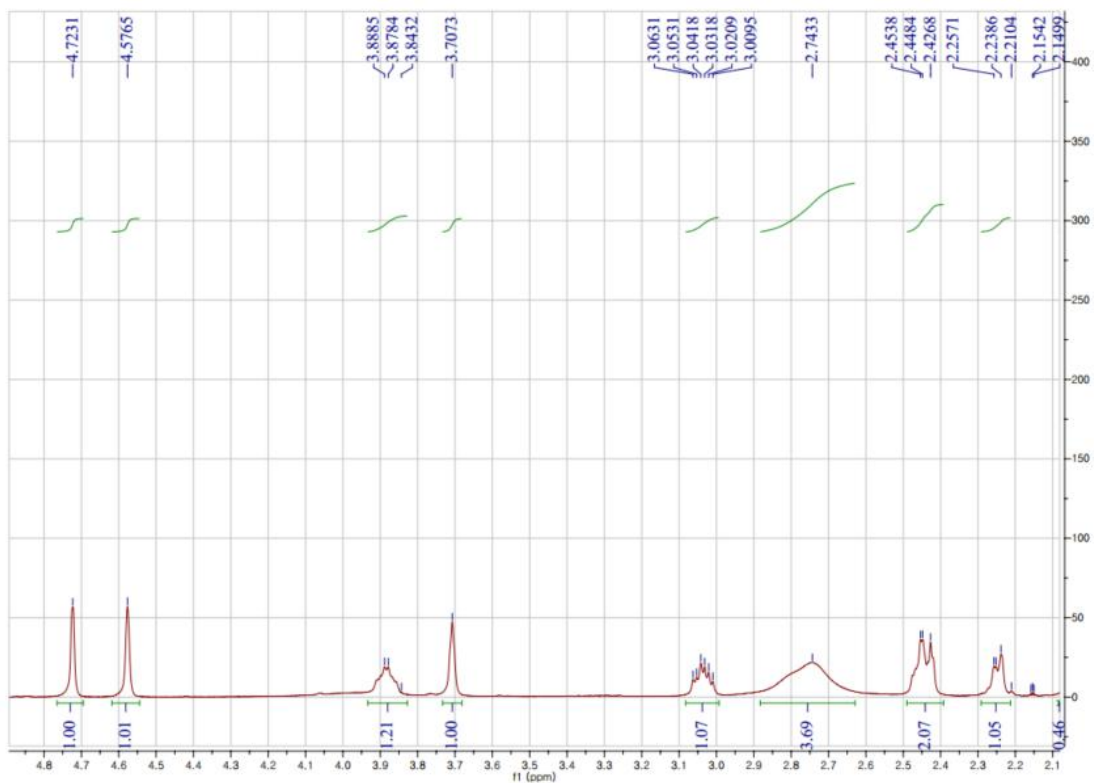

Figure S58. Expand  $^1\text{H}$  NMR spectrum of  $3\alpha,11\alpha$ -dihydroxy-lup-20(29)-en-23,28-dioic acid in acetone- $d_6$

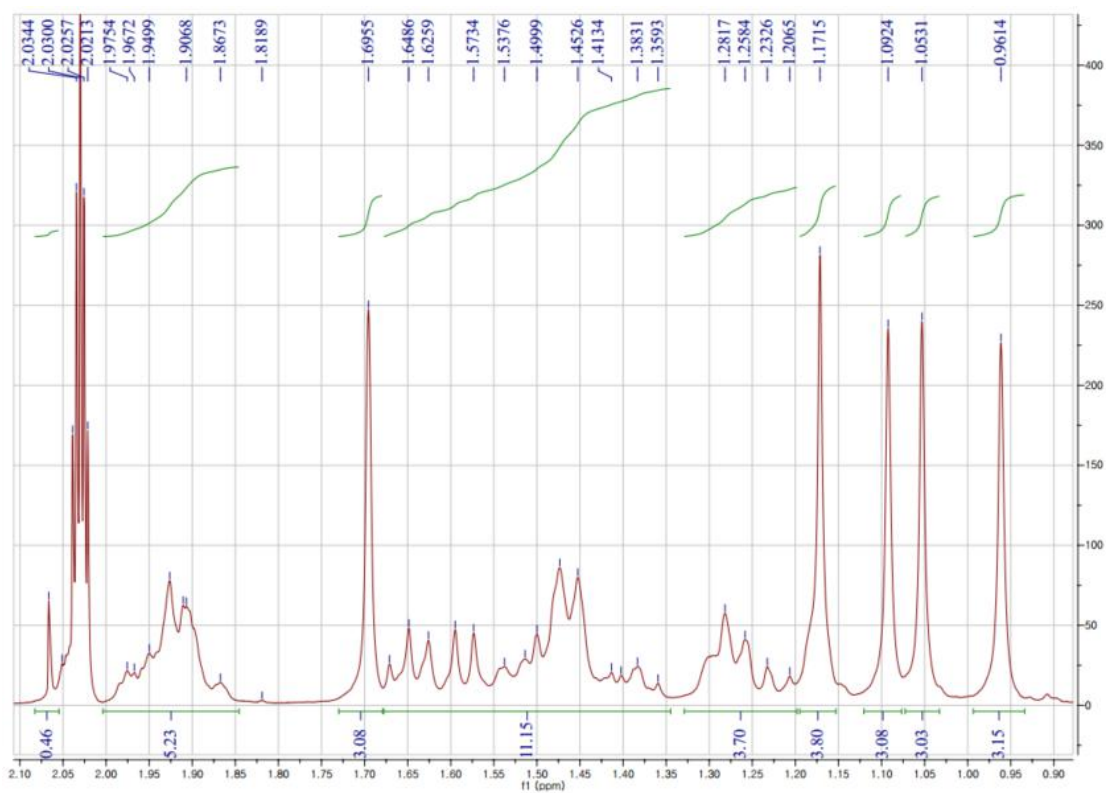

Figure S59. Expand  $^1\text{H}$  NMR spectrum of  $3\alpha,11\alpha$ -dihydroxy-lup-20(29)-en-23,28-dioic acid in acetone- $d_6$



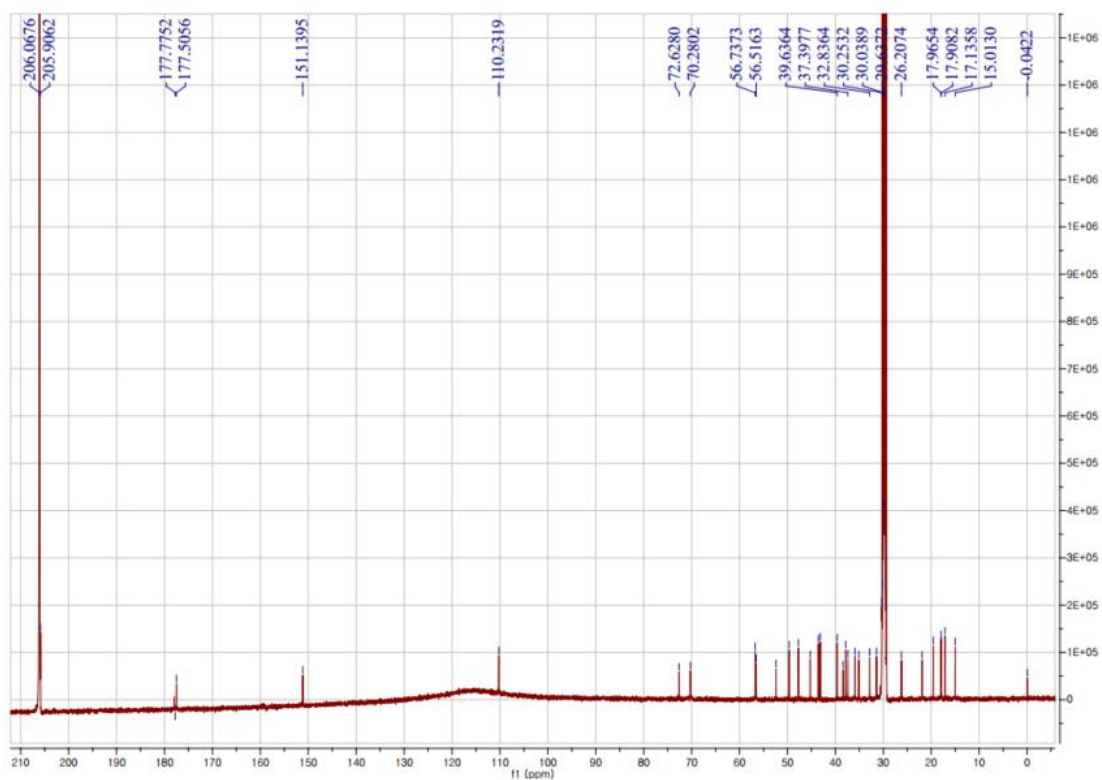

Figure S60.  $^{13}\text{C}$  NMR spectrum of  $3\alpha,11\alpha$ -dihydroxy-lup-20(29)-en-23,28-dioic acid in acetone- $d_6$

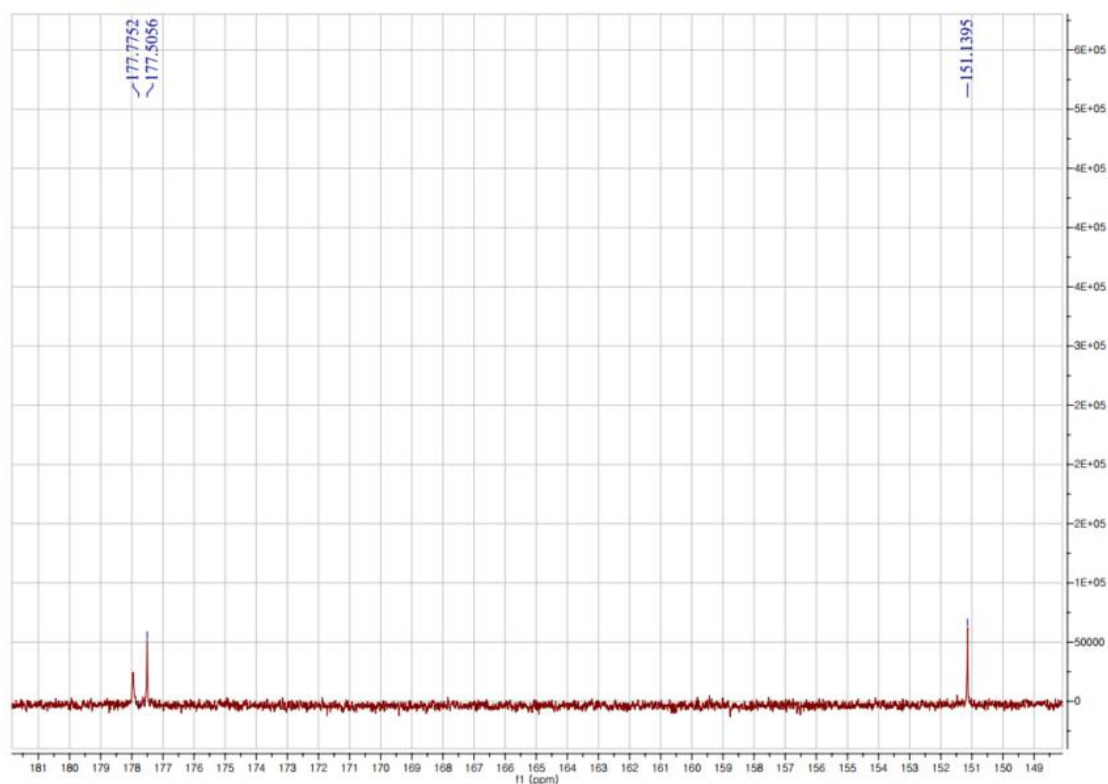

Figure S61. Expand  $^{13}\text{C}$  NMR spectrum of  $3\alpha,11\alpha$ -dihydroxy-lup-20(29)-en-23,28-dioic acid in acetone- $d_6$



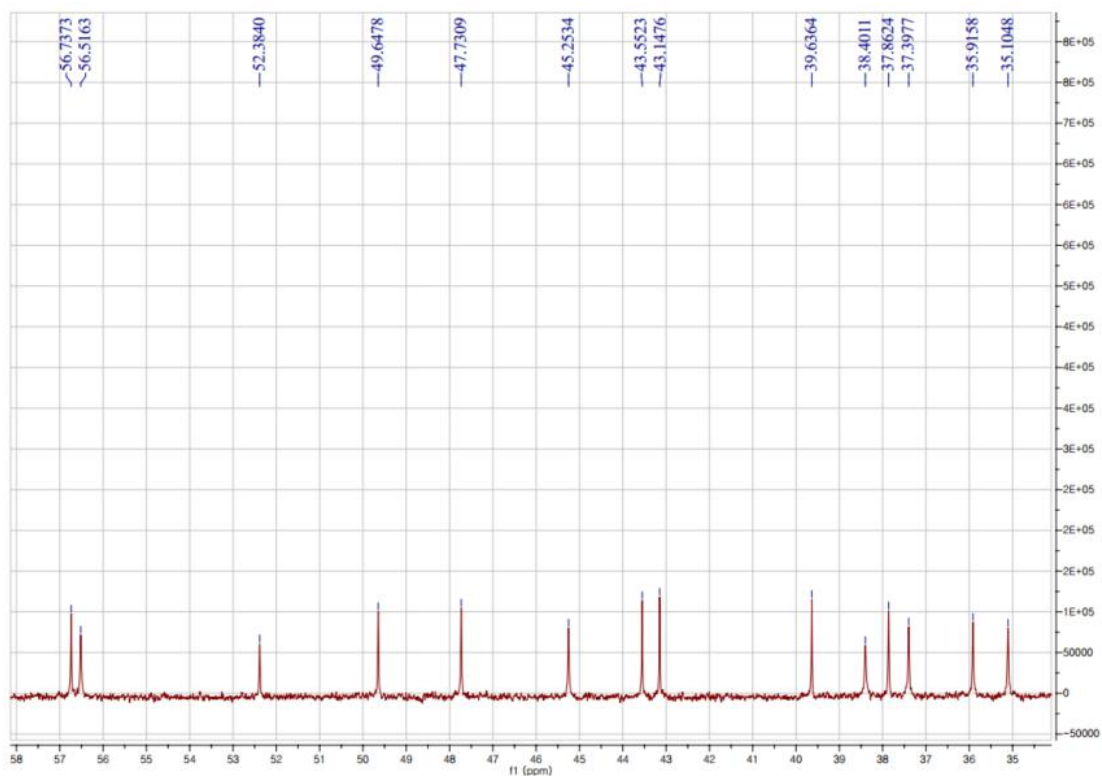

Figure S62. Expand  $^{13}\text{C}$  NMR spectrum of  $3\alpha,11\alpha$ -dihydroxy-lup-20(29)-en-23,28-dioic acid in acetone- $d_6$

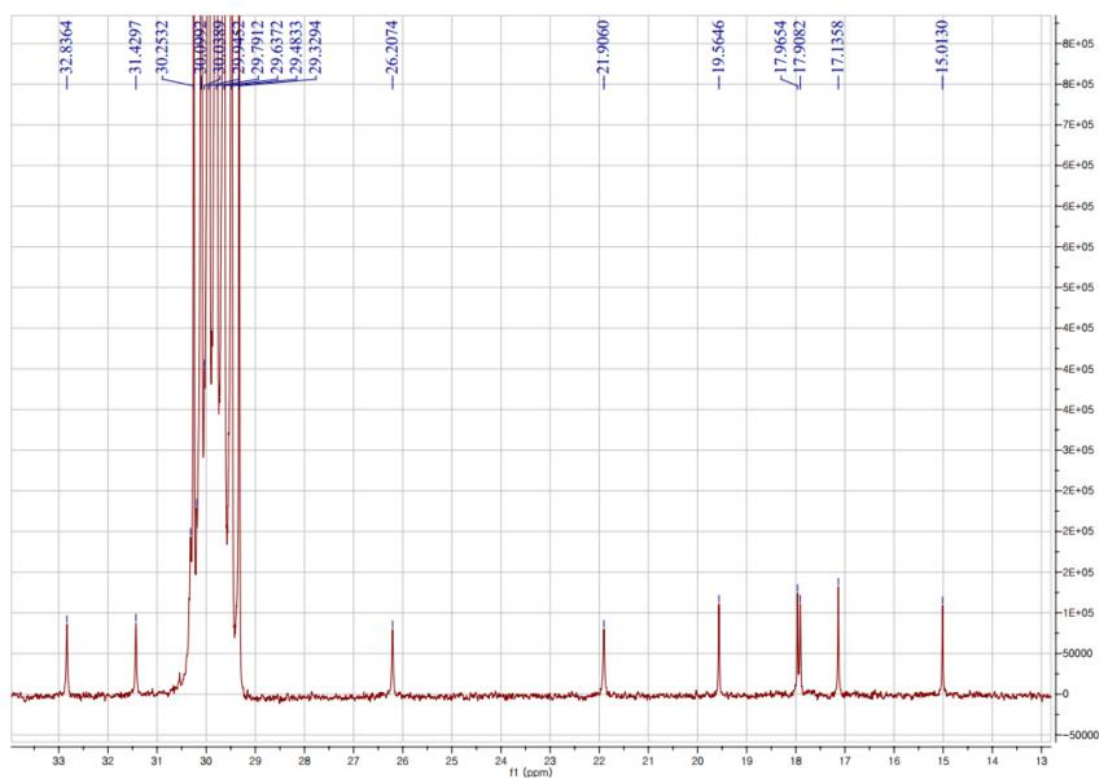

Figure S63. Expand  $^{13}\text{C}$  NMR spectrum of  $3\alpha,11\alpha$ -dihydroxy-lup-20(29)-en-23,28-dioic acid in acetone- $d_6$

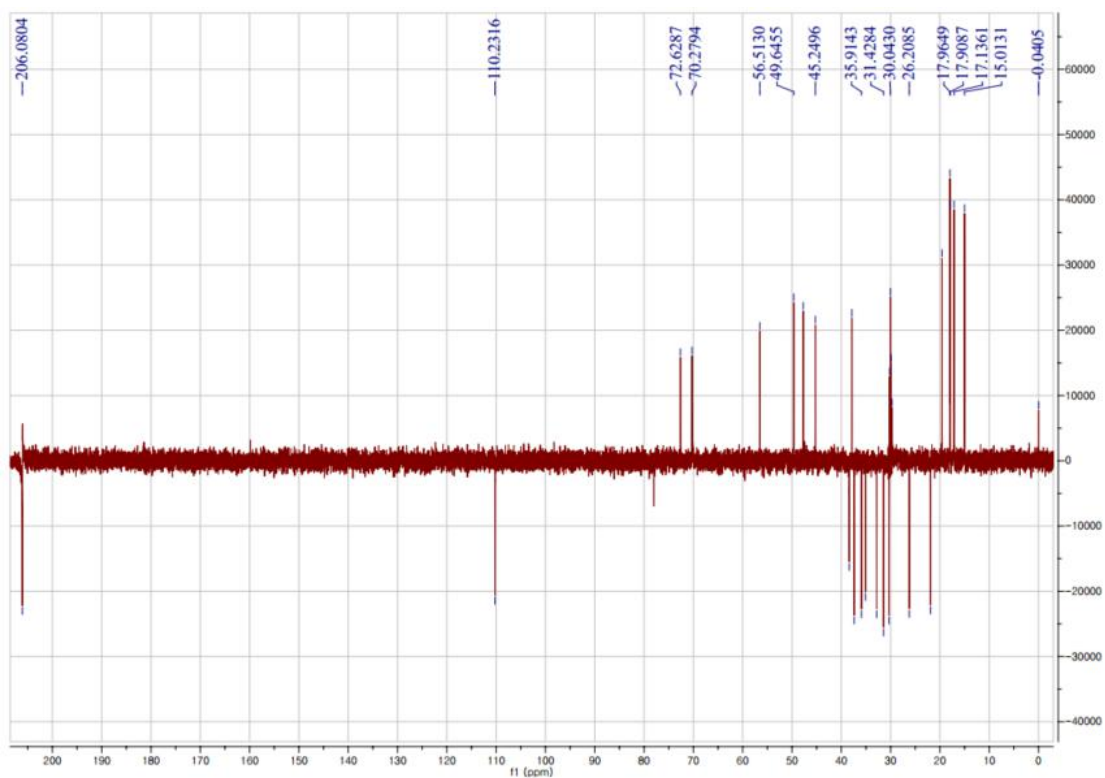

Figure S64. DEPT spectrum of 3α,11α-dihydroxy-lup-20(29)-en-23,28-dioic acid in acetone-*d*<sub>6</sub>

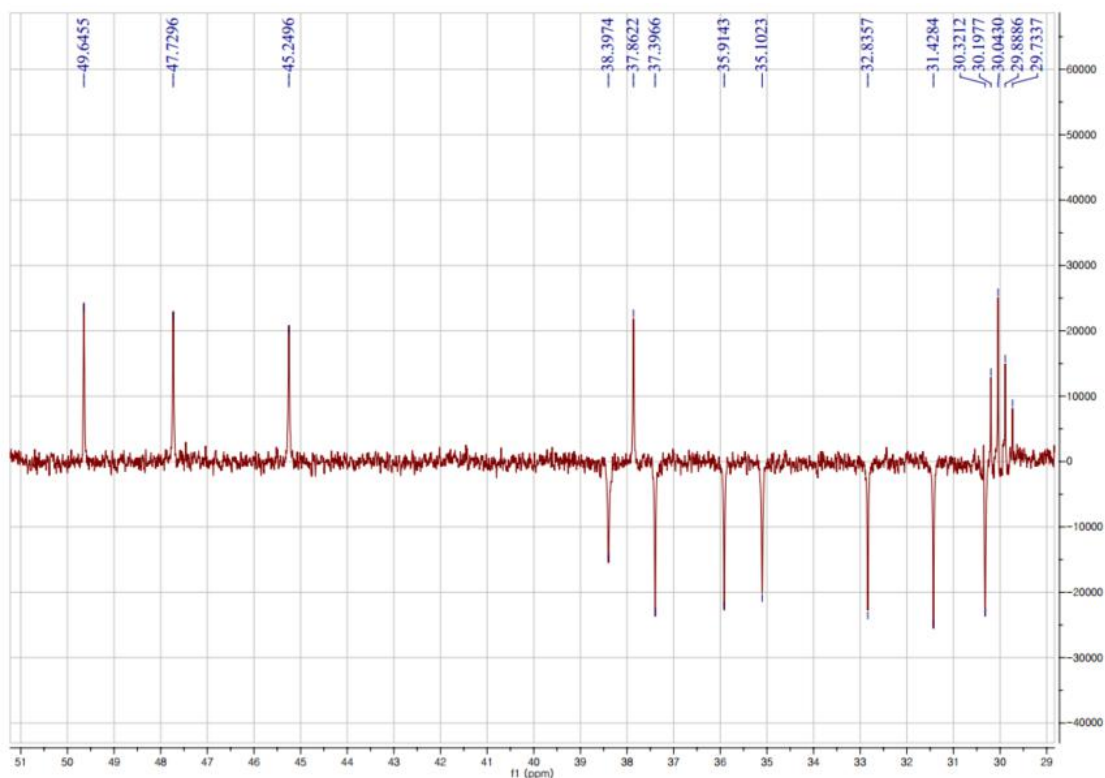

Figure S65. Expand DEPT spectrum of 3α,11α-dihydroxy-lup-20(29)-en-23,28-dioic acid in acetone-*d*<sub>6</sub>

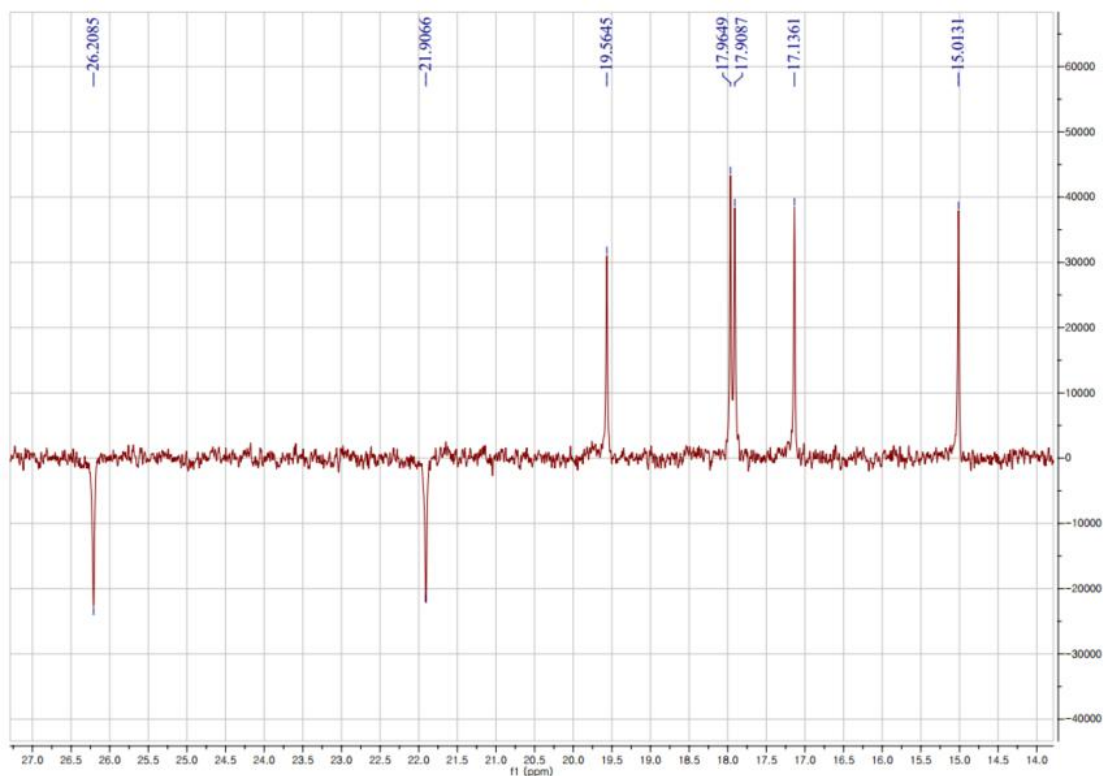

Figure S66. Expand DEPT spectrum of 3 $\alpha$ ,11 $\alpha$ -dihydroxy-lup-20(29)-en-23,28-dioic acid in acetone- $d_6$

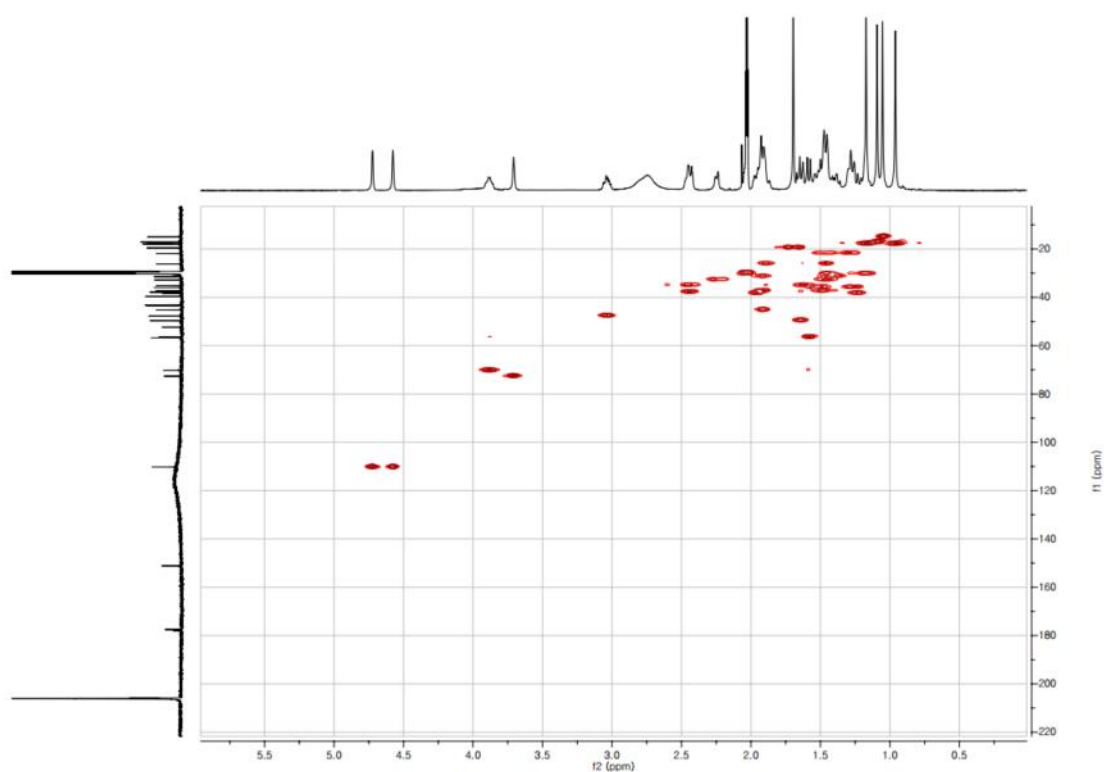

Figure S67. HSQC spectrum of 3 $\alpha$ ,11 $\alpha$ -dihydroxy-lup-20(29)-en-23,28-dioic acid in acetone- $d_6$

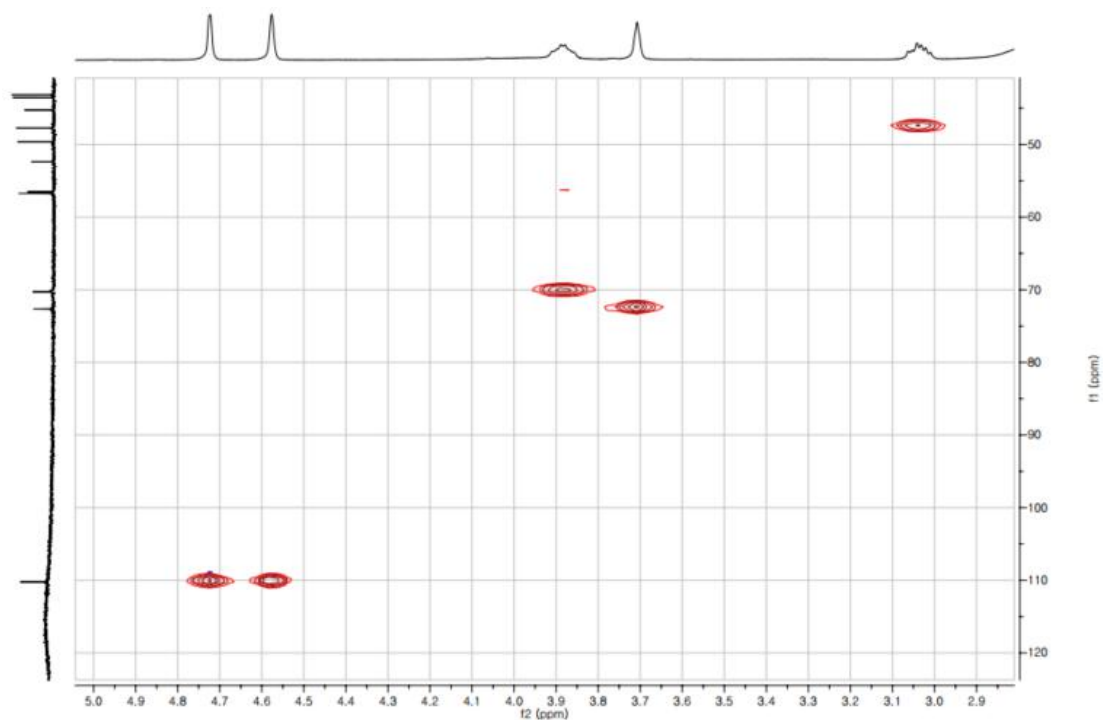

Figure S68. Expand HSQC spectrum of  $3\alpha,11\alpha$ -dihydroxy-lup-20(29)-en-23,28-dioic acid in acetone- $d_6$

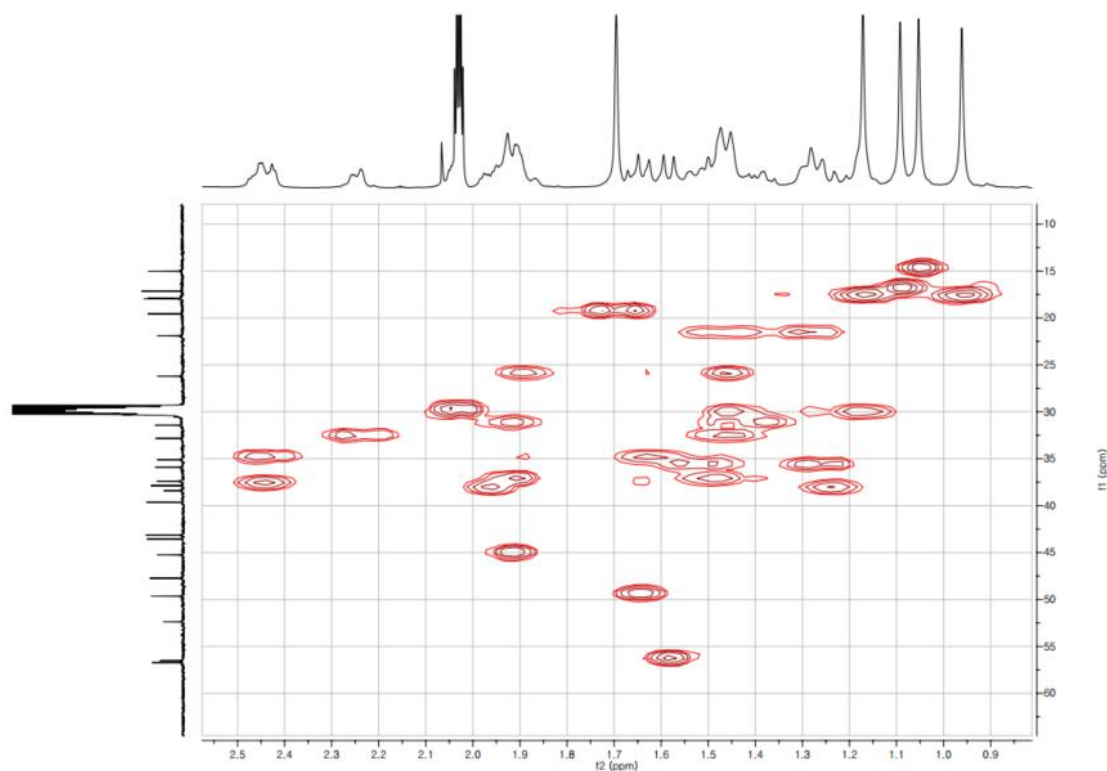

Figure S69. Expand HSQC spectrum of  $3\alpha,11\alpha$ -dihydroxy-lup-20(29)-en-23,28-dioic acid in acetone- $d_6$

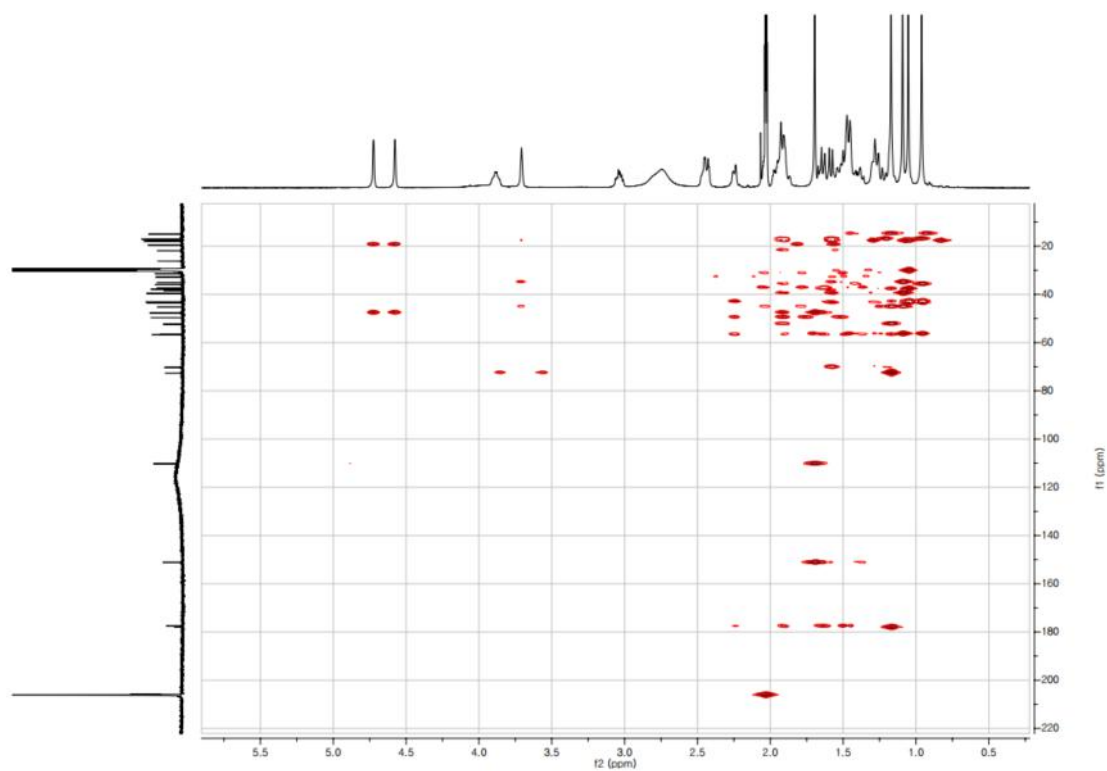

Figure S70. HMBC spectrum of  $3\alpha,11\alpha$ -dihydroxy-lup-20(29)-en-23,28-dioic acid in acetone- $d_6$

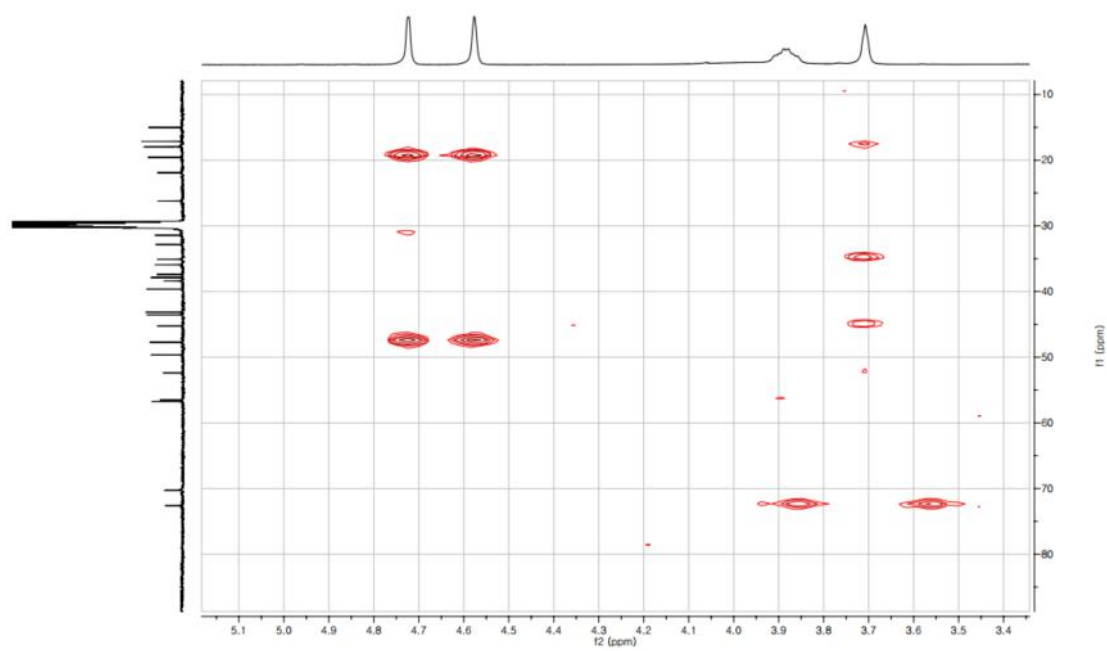

Figure S71. Expand HMBC spectrum of  $3\alpha,11\alpha$ -dihydroxy-lup-20(29)-en-23,28-dioic acid in acetone- $d_6$

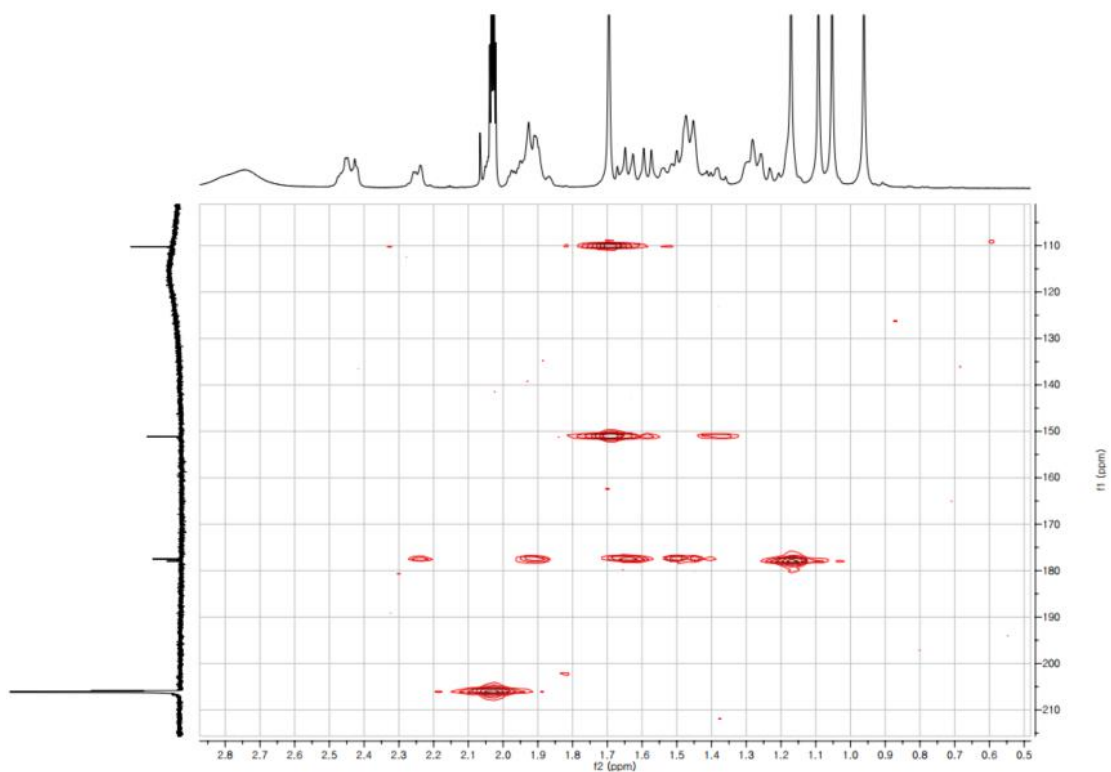

Figure S72. Expand HMBC spectrum of  $3\alpha,11\alpha$ -dihydroxy-lup-20(29)-en-23,28-dioic acid in acetone- $d_6$

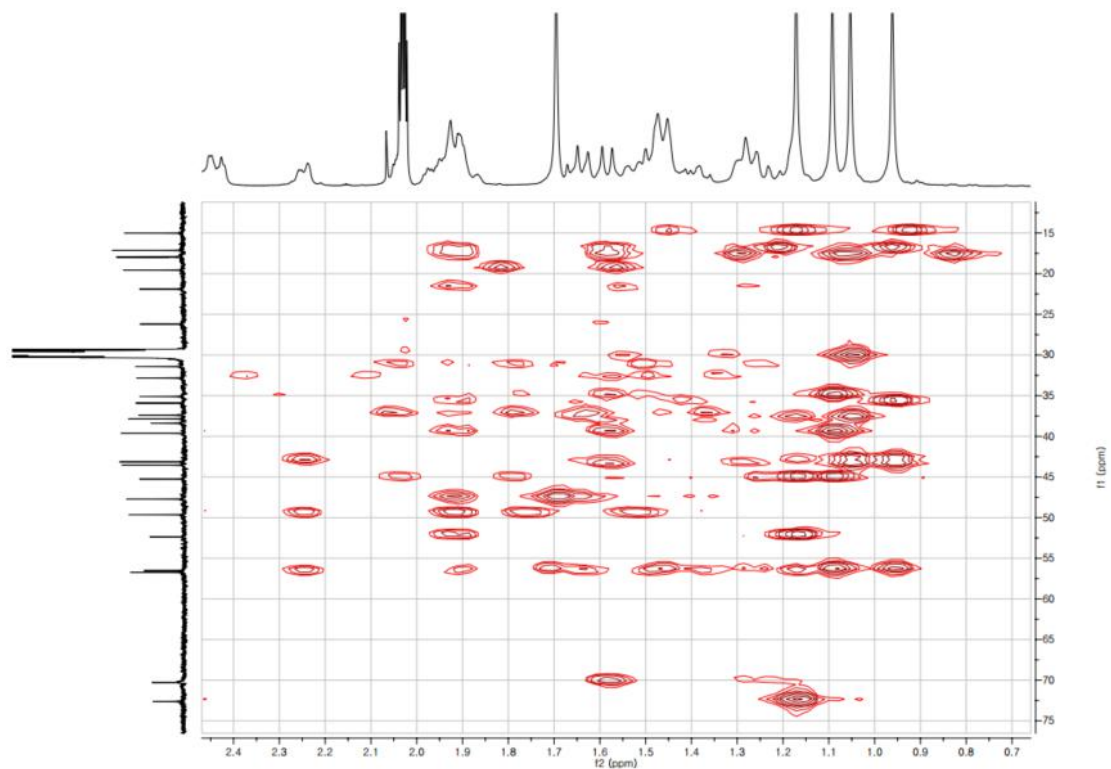

Figure S73. Expand HMBC spectrum of  $3\alpha,11\alpha$ -dihydroxy-lup-20(29)-en-23,28-dioic acid in acetone- $d_6$

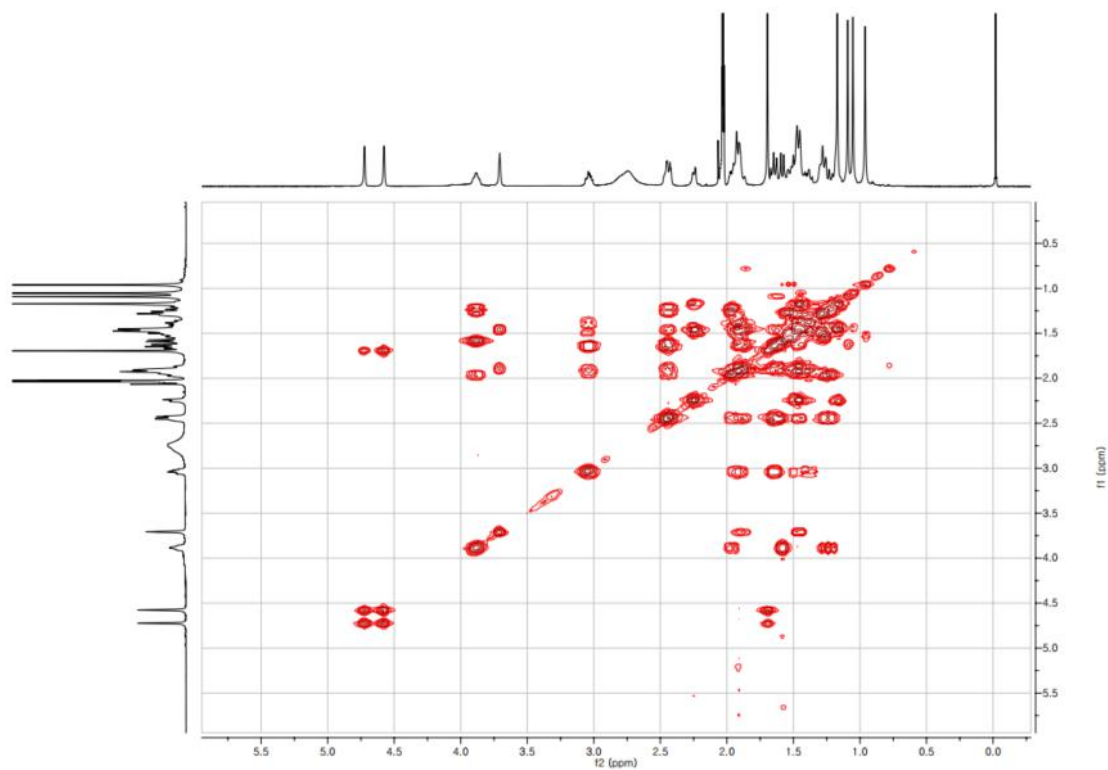

**Figure S74.**  $^1\text{H}$ - $^1\text{H}$  COSY spectrum of  $3\alpha,11\alpha$ -dihydroxy-lup-20(29)-en-23,28-dioic acid in acetone- $d_6$

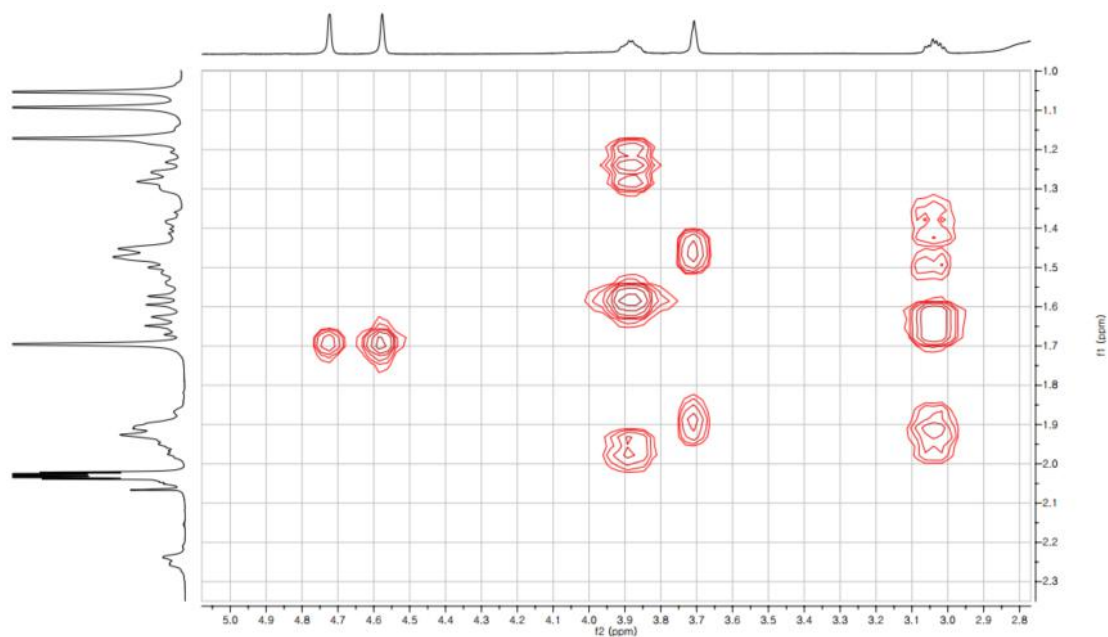

**Figure S75.** Expand  $^1\text{H}$ - $^1\text{H}$  COSY spectrum of  $3\alpha,11\alpha$ -dihydroxy-lup-20(29)-en-23,28-dioic acid in acetone- $d_6$



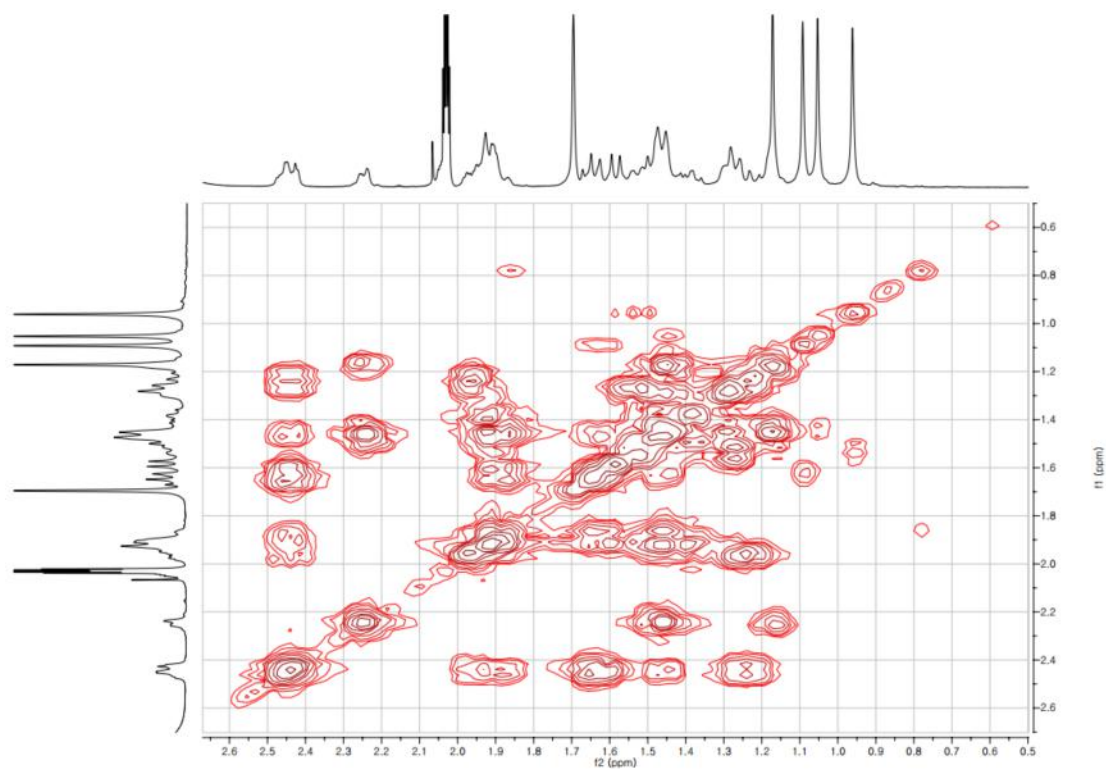

**Figure S76.** Expand  $^1\text{H}$ - $^1\text{H}$  COSY spectrum of  $3\alpha,11\alpha$ -dihydroxy-lup-20(29)-en-23,28-dioic acid in acetone- $d_6$

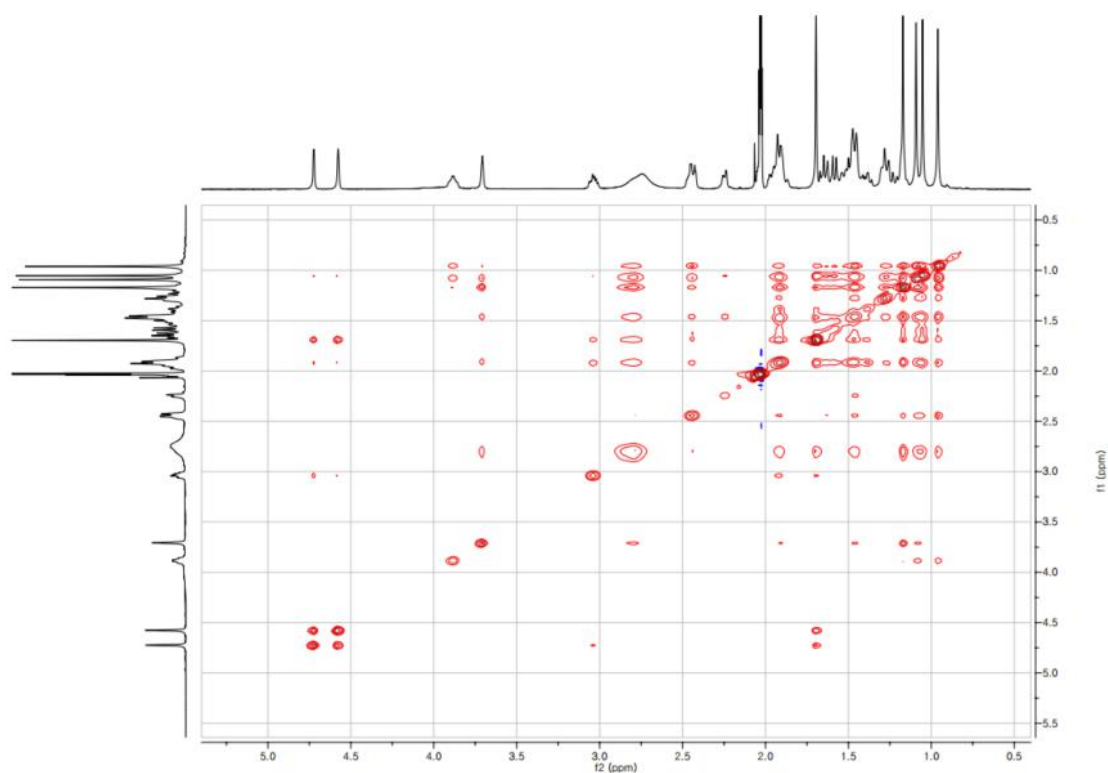

**Figure S77.** NOESY spectrum of  $3\alpha,11\alpha$ -dihydroxy-lup-20(29)-en-23,28-dioic acid in acetone- $d_6$

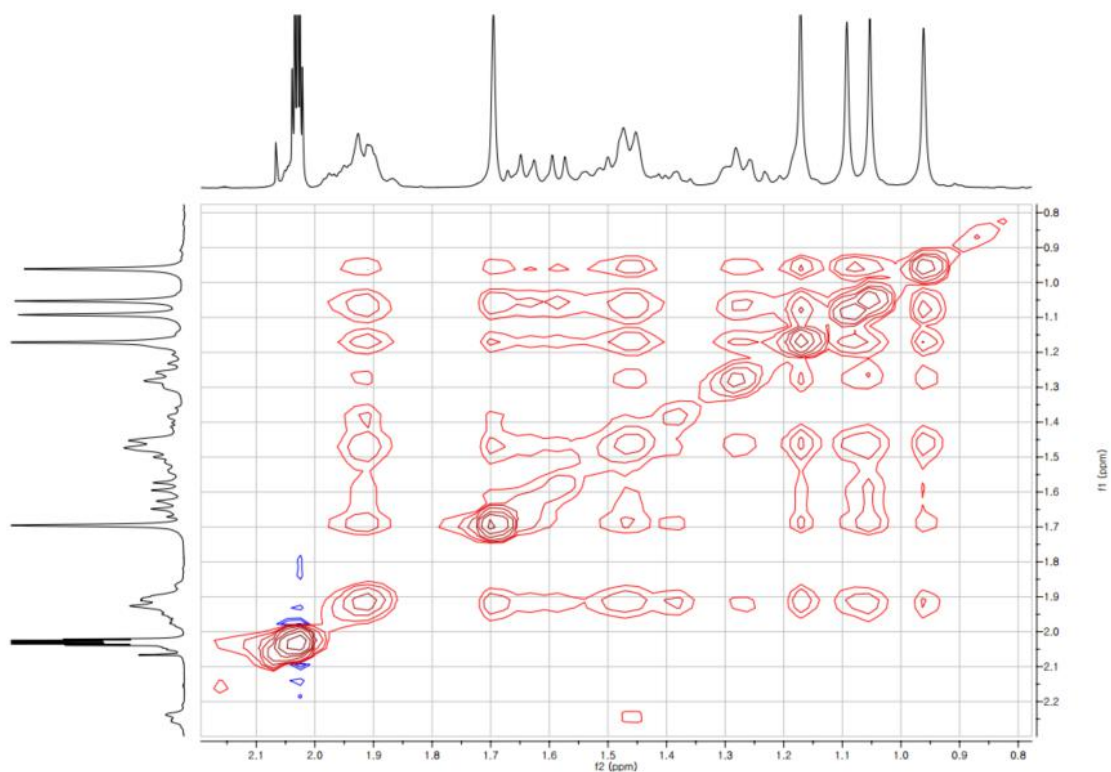

Figure S78. Expand NOESY spectrum of  $3\alpha,11\alpha$ -dihydroxy-lup-20(29)-en-23,28-dioic acid in acetone- $d_6$

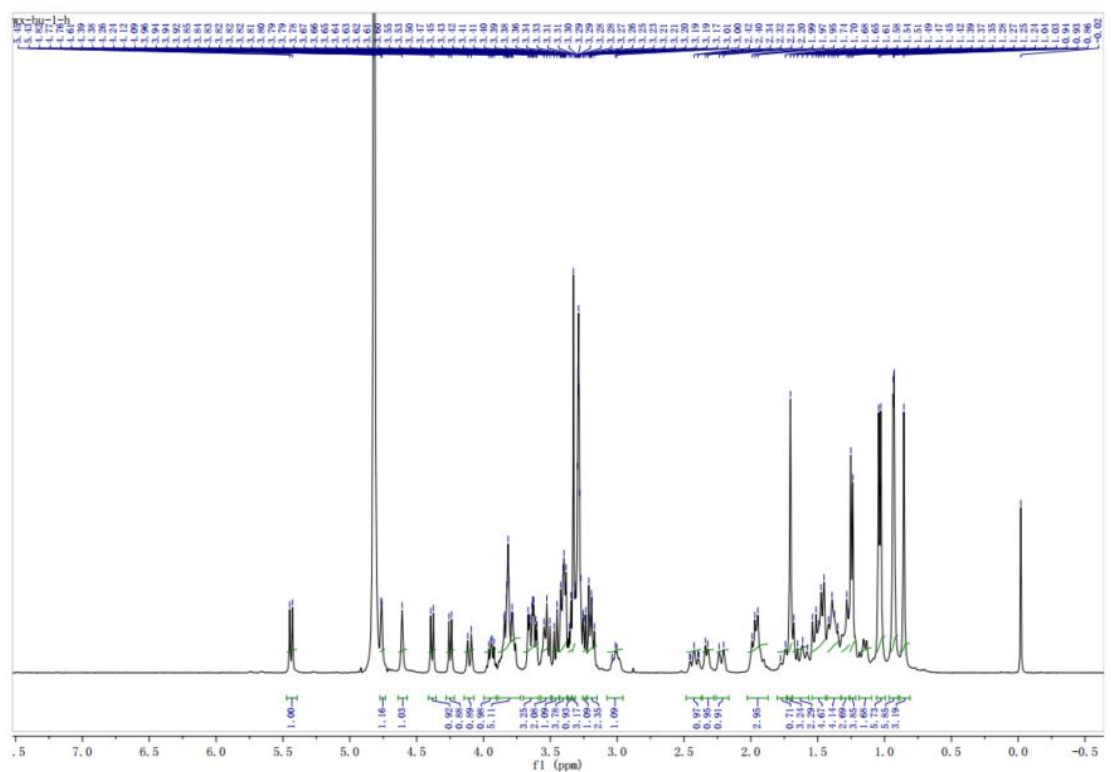

Figure S79.  $^1\text{H}$  NMR spectrum of acankoreoside C in methanol- $d_4$

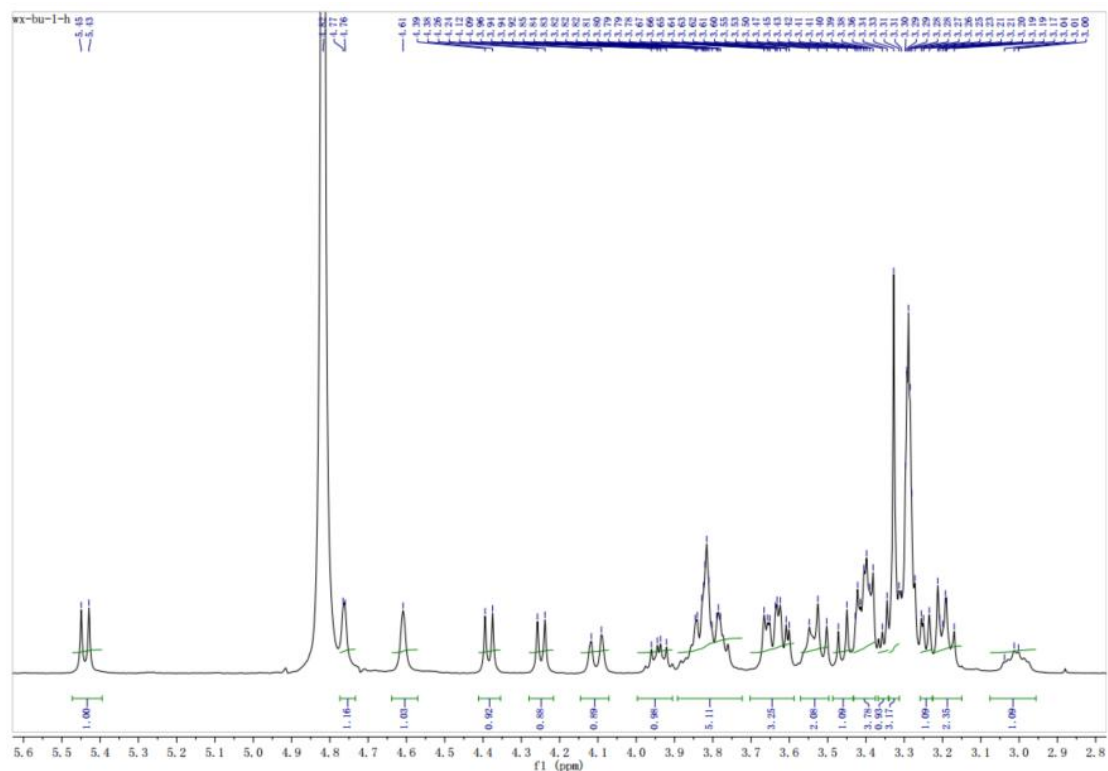

Figure S80. Expand  $^1\text{H}$  NMR spectrum of acankoreoside C in methanol- $d_4$

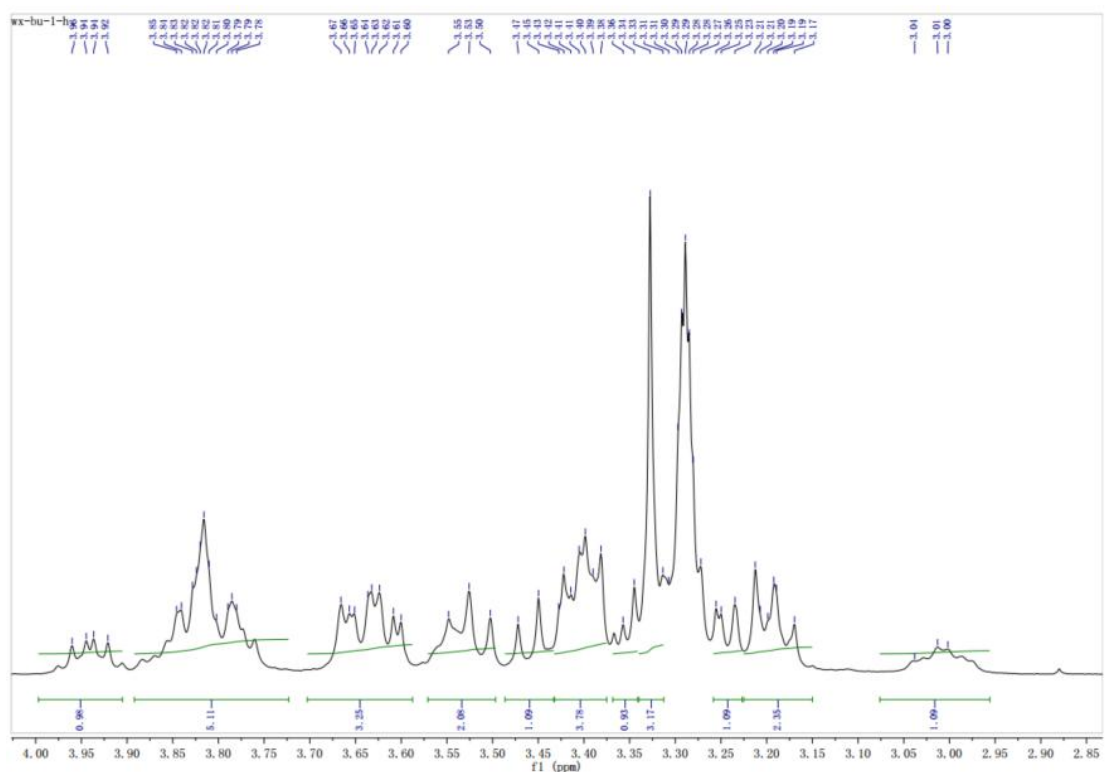

Figure S81. Expand  $^1\text{H}$  NMR spectrum of acankoreoside C in methanol- $d_4$

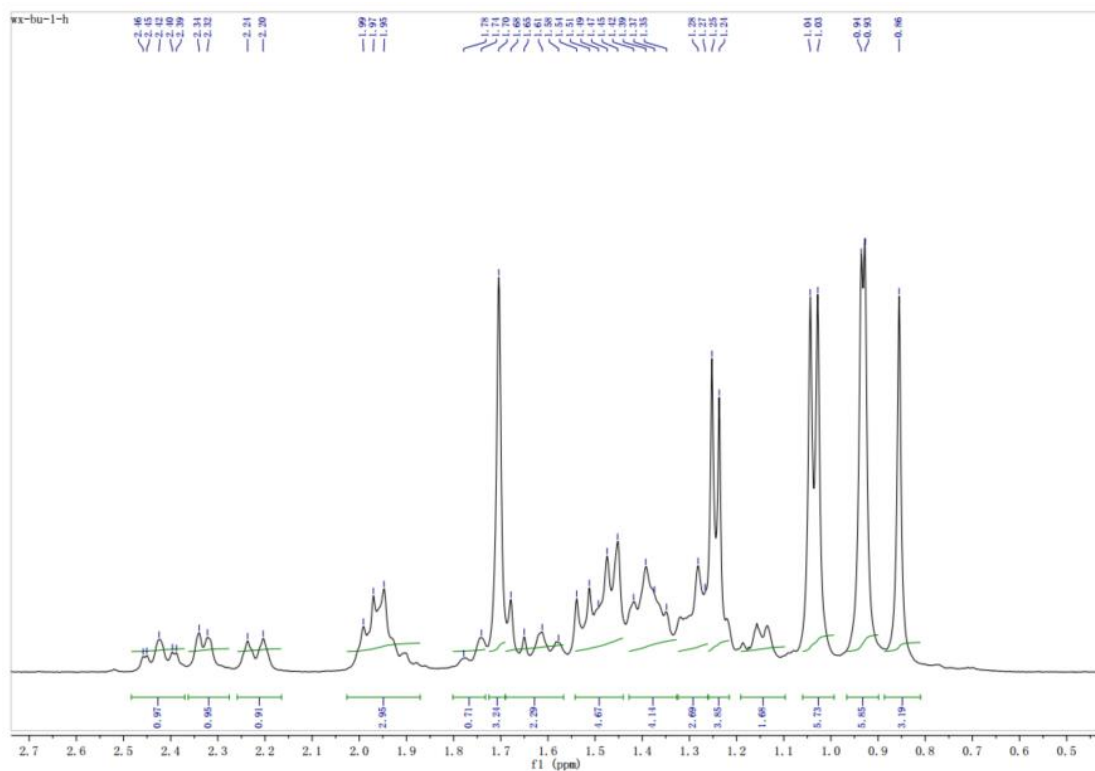

Figure S82. Expand  $^1\text{H}$  NMR spectrum of acankoreoside C in methanol- $d_4$

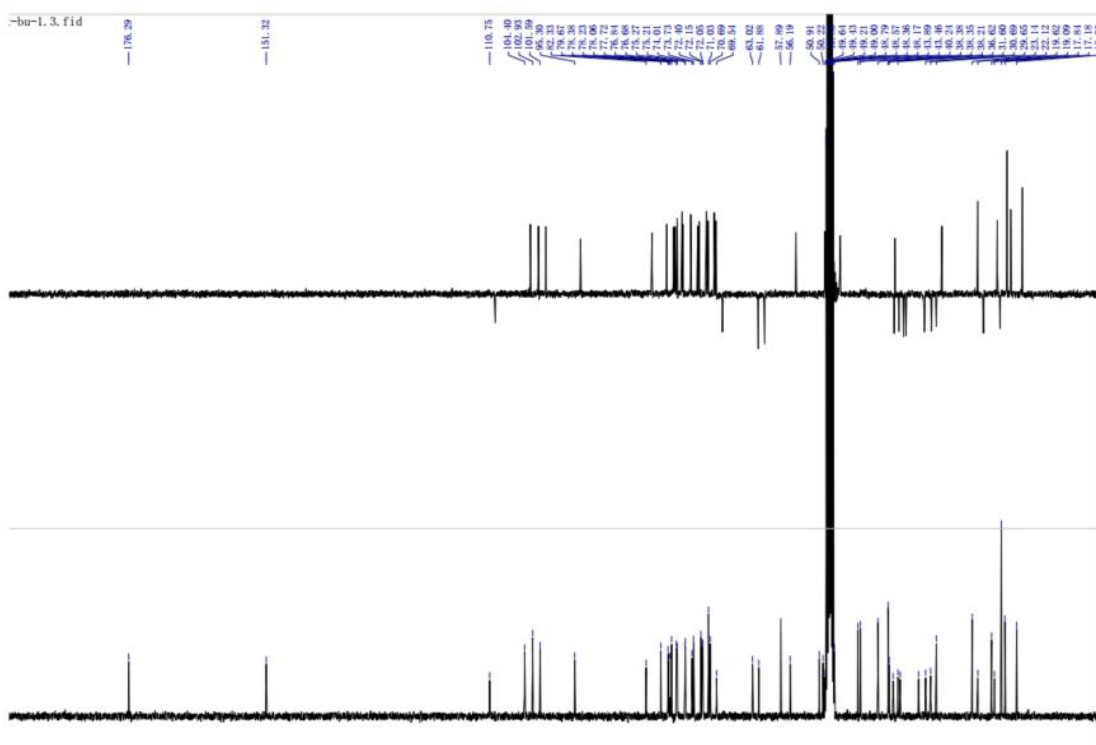

Figure S83.  $^{13}\text{C}$  NMR spectrum of acankoreoside C in methanol- $d_4$

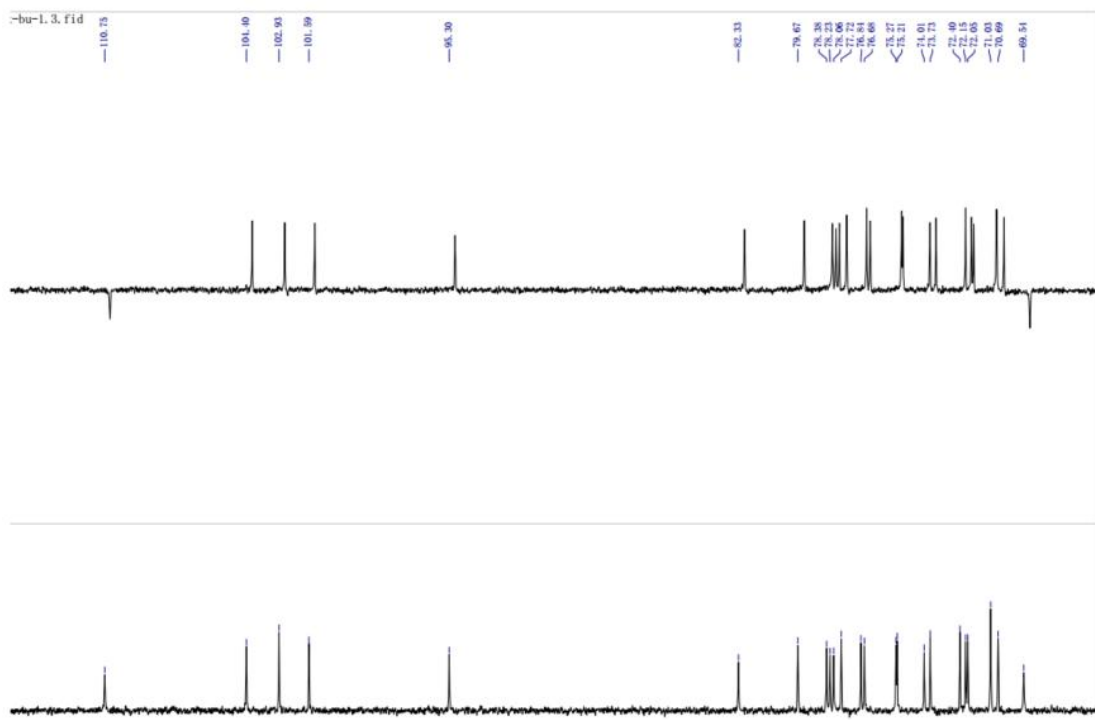

**Table S1.** <sup>1</sup>H NMR (400 MHz) and <sup>13</sup>C NMR (100 MHz) spectral data of compound 1  
(acetone-*d*<sub>6</sub>, δ ppm)

| Position | δ <sub>C</sub> | DEPT            | δ <sub>H</sub> [mult. (J in Hz)]         | HMBC correlations            |
|----------|----------------|-----------------|------------------------------------------|------------------------------|
| C-1      | 75.46          | CH              | 3.84 (1H, dd, 8.16, 3.96)                | H-2, H-25                    |
| C-2      | 37.36          | CH <sub>2</sub> | 1.82 (1H, m); 1.87 (1H, m)               | H-1                          |
| C-3      | 73.99          | CH              | 3.82 (1H, t, 2.40)                       | H-2, H-24                    |
| C-4      | 52.27          | C               | -                                        | H-2, H-5, H-24               |
| C-5      | 45.25          | CH              | 1.95 (1H, m)                             | H-3, H-6, H-7, H-24, H-25    |
| C-6      | 22.09          | CH <sub>2</sub> | 1.35 (1H, m); 1.57 (1H, m)               | H-5                          |
| C-7      | 35.19          | CH <sub>2</sub> | 1.31 (1H, m); 1.56 (1H, m)               | H-5, H-26                    |
| C-8      | 42.76          | C               | -                                        | H-6, H-9, H-11, H-26, H-27   |
| C-9      | 52.98          | CH              | 1.72 (1H, dd, 10.08, 2.68)               | H-1, H-11, H-25, H-26        |
| C-10     | 44.33          | C               | -                                        | H-1, H-5, H-11, H-25         |
| C-11     | 24.68          | CH <sub>2</sub> | 1.32 (1H, m); 2.43 (1H, brd, 9.80)       | -                            |
| C-12     | 26.87          | CH <sub>2</sub> | 1.12 (1H, dd, 10.52, 3.76); 1.68 (1H, m) | -                            |
| C-13     | 39.14          | CH              | 2.34 (1H, td, 10.32, 3.0)                | H-12, H-18, H-27             |
| C-14     | 43.72          | C               | -                                        | H-13, H-16, H-26, H-27       |
| C-15     | 30.75          | CH <sub>2</sub> | 1.20 (1H, m); 1.46 (1H, m)               | H-16, H-27                   |
| C-16     | 33.15          | CH <sub>2</sub> | 1.48 (1H, m); 2.25 (1H, dt, 9.84, 2.8)   | H-18                         |
| C-17     | 56.98          | C               | -                                        | H-13, H-15, H-16, H-18, H-22 |
| C-18     | 50.30          | CH              | 1.64 (1H, m)                             | H-12, H-13, H-16, H-19, H-22 |
| C-19     | 48.24          | CH              | 3.05 (1H, td, 8.76, 4.0)                 | H-18, H-21, H-22, H-29, H-30 |
| C-20     | 151.89         | C               | -                                        | H-18, H-19, H-21, H-29, H-30 |
| C-21     | 31.61          | CH <sub>2</sub> | 1.34 (1H, m); 1.90 (1H, m)               | H-19, H-22                   |
| C-22     | 37.84          | CH <sub>2</sub> | 1.48 (1H, m); 1.92 (1H, m)               | H-18, H-21                   |
| C-23     | 178.16         | COOH            | -                                        | H-3, H-5, H-24               |
| C-24     | 17.92          | CH <sub>3</sub> | 1.17 (3H, s)                             | H-5                          |
| C-25     | 13.24          | CH <sub>3</sub> | 0.97 (3H, s)                             | H-1, H-5, H-9                |
| C-26     | 17.31          | CH <sub>3</sub> | 0.99 (3H, s)                             | H-7, H-9                     |
| C-27     | 15.40          | CH <sub>3</sub> | 1.07 (3H, s)                             | H-13, H-15                   |
| C-28     | 177.84         | COOH            | -                                        | H-16, H-18, H-22             |
| C-29     | 110.26         | CH <sub>2</sub> | 4.58 (1H, m); 4.72 (1H, d, 1.68)         | H-19, H-30                   |
| C-30     | 19.72          | CH <sub>3</sub> | 1.71 (3H, s)                             | H-19, H-29                   |

**Table S2.** <sup>1</sup>H NMR (400 MHz) and <sup>13</sup>C NMR (100 MHz) spectral data of compound 2 (methanol-*d*<sub>4</sub>, δ ppm)

| Position | δ <sub>C</sub> | DEPT            | δ <sub>H</sub> [mult. (J in Hz)] | HMBC correlations               |
|----------|----------------|-----------------|----------------------------------|---------------------------------|
| Aglycone |                |                 |                                  |                                 |
| C-1      | 76.33          | CH              | 3.80 (1H, m)                     | H-2, H-3, H-5, H-25             |
| C-2      | 36.79          | CH <sub>2</sub> | 1.72 (1H, m); 1.80 (1H, m)       | H-1                             |
| C-3      | 74.14          | CH              | 3.67 (1H, m)                     | H-1, H-2, H-24                  |
| C-4      | 52.24          | C               | -                                | H-2, H-5, H-24                  |
| C-5      | 46.11          | CH              | 1.87 (1H, m)                     | H-3, H-6, H-7, H-9, H-24, H-25  |
| C-6      | 22.17          | CH <sub>2</sub> | 1.26 (1H, m); 1.58 (1H, m)       | H-5, H-7                        |
| C-7      | 35.09          | CH <sub>2</sub> | 1.30 (1H, m); 1.55 (1H, m)       | H-5, H-6, H-26                  |
| C-8      | 42.96          | C               | -                                | H-6, H-7, H-9, H-26, H-27       |
| C-9      | 53.06          | CH              | 1.72 (1H, m)                     | H-1/H-5/H-7/H-11/H-12/H-25/H-26 |
| C-10     | 44.47          | C               | -                                | H-1, H-5, H-6, H-9, H-11, H-25  |
| C-11     | 24.82          | CH <sub>2</sub> | 1.36 (1H, m); 2.28 (1H, m)       | H-12                            |
| C-12     | 26.94          | CH <sub>2</sub> | 1.12 (1H, m); 1.68 (1H, m)       | H-13                            |
| C-13     | 39.13          | CH              | 2.27 (1H, m)                     | H-12, H-18, H-19, H-27          |
| C-14     | 43.82          | C               | -                                | H-13, H-16, H-18, H-26, H-27    |
| C-15     | 30.86          | CH <sub>2</sub> | 1.15 (1H, m); 1.54 (1H, m)       | H-13, H-16, H-27                |
| C-16     | 32.95          | CH <sub>2</sub> | 1.44 (1H, m); 2.33 (1H, m)       | H-15, H-18, H-22                |
| C-17     | 57.93          | C               | -                                | H-15, H-16, H-18, H-21, H-22    |

|                  |        |                 |                                            |                                        |
|------------------|--------|-----------------|--------------------------------------------|----------------------------------------|
| C-18             | 50.6   | CH              | 1.65 (1H, m)                               | H-13, H-16, H-19, H-21, H-22           |
| C-19             | 48.36  | CH              | 3.0 (1H, m)                                | H-18, H-21, H-29, H-30                 |
| C-20             | 151.77 | C               | -                                          | H-18, H-19, H-21, H-29, H-30           |
| C-21             | 31.55  | CH <sub>2</sub> | 1.37 (1H, m); 1.94 (1H, m)                 | H-19, H-22                             |
| C-22             | 37.68  | CH <sub>2</sub> | 1.48 (1H, m); 1.94 (1H, m)                 | H-21                                   |
| C-23             | 182.6  | COOH            | -                                          | H-5, H-24                              |
| C-24             | 18.08  | CH <sub>3</sub> | 1.09 (3H, s)                               | H-5                                    |
| C-25             | 13.17  | CH <sub>3</sub> | 0.95 (3H, s)                               | H-1, H-5, H-9                          |
| C-26             | 17.14  | CH <sub>3</sub> | 0.98 (3H, s)                               | H-7, H-9                               |
| C-27             | 15.1   | CH <sub>3</sub> | 1.03 (3H, s)                               | H-13, H-15                             |
| C-28             | 176.4  | CO-S            | -                                          | H-16, H-18, H-22, glc-H-1              |
| C-29             | 110.41 | CH <sub>2</sub> | 4.58 (1H, brs); 4.72 (1H, brs)             | H-30                                   |
| C-30             | 19.49  | CH <sub>3</sub> | 1.70 (3H, s)                               | H-19, H-29                             |
| C-28-O-inner glc |        |                 |                                            |                                        |
| 1                | 95.26  | CH              | 5.45 (1H, d, 6.56)                         | glcH-2                                 |
| 2                | 74.00  | CH              | 3.33 (1H, m)                               | glcH-3                                 |
| 3                | 78.28  | CH              | 3.42 (1H, m)                               | glcH-2, glcH-4, glcH-5                 |
| 4                | 70.95  | CH              | 3.43 (1H, m)                               | glcH-2, glcH-3, glcH-5, glcH-6         |
| 5                | 78.06  | CH              | 3.54 (1H, m)                               | glcH-1, glcH-4, glcH-6                 |
| 6                | 69.55  | CH <sub>2</sub> | 3.81 (1H, m);<br>4.11 (1H, dd, 9.48, 1.36) | glcH-1'                                |
| glc'(1→6)glc     |        |                 |                                            |                                        |
| 1'               | 104.56 | CH              | 4.37 (1H, d, 6.28)                         | glcH-6, glcH-2'                        |
| 2'               | 75.32  | CH              | 3.23 (1H, m)                               | glcH-3', glcH-4'                       |
| 3'               | 76.71  | CH              | 3.45 (1H, m)                               | glcH-2', glcH-5'                       |
| 4'               | 79.51  | CH              | 3.53 (1H, m)                               | glcH-3', glcH-6', rha H-1''            |
| 5'               | 76.89  | CH              | 3.30 (1H, m)                               | glcH-4', glcH-6'                       |
| 6'               | 61.90  | CH <sub>2</sub> | 3.65 (1H, m); 3.80 (1H, m)                 | glcH-4'                                |
| rha(1→4)glc'     |        |                 |                                            |                                        |
| 1''              | 102.92 | CH              | 4.84 (1H, overlapped)                      | glcH-4'                                |
| 2''              | 72.44  | CH              | 3.81 (1H, m)                               | rhaH-1'', rhaH-3'', rhaH-4''           |
| 3''              | 72.16  | CH              | 3.62 (1H, m)                               | rhaH-1'', rhaH-2'', rhaH-4''           |
| 4''              | 73.75  | CH              | 3.38 (1H, m)                               | rhaH-2'', rhaH-3'', rhaH-5'', rhaH-6'' |
| 5''              | 70.64  | CH              | 3.95 (1H, m)                               | rhaH-1'', rhaH-4'', rhaH-6''           |
| 6''              | 17.84  | CH <sub>3</sub> | 1.25 (3H, d, 4.96)                         | rhaH-4''                               |

**Table S3.** NMR spectral data of compounds **3-4**.

| Position | <b>3</b><br>$\delta_c^{a,c}$ | $\delta_H^{a,d}$ [mult. (J in Hz)] | <b>4</b><br>$\delta_c^{b,c}$ | $\delta_H^{b,d}$ [mult. (J in Hz)] |
|----------|------------------------------|------------------------------------|------------------------------|------------------------------------|
| Aglycone |                              |                                    |                              |                                    |
| C-1      | 32.84                        | 1.46 (1H, m); 2.24 (1H, m)         | 36.62                        | -                                  |
| C-2      | 26.21                        | 1.46 (1H, m); 1.90 (1H, m)         | 22.12                        | -                                  |
| C-3      | 72.65                        | 3.71 (1H, brs)                     | 82.33                        | 3.67 (1H, m)                       |
| C-4      | 52.39                        | -                                  | 38.35                        | -                                  |
| C-5      | 45.26                        | 1.92 (1H, m)                       | 50.91                        | -                                  |
| C-6      | 21.91                        | 1.30 (1H, m); 1.48 (1H, m)         | 19.09                        | -                                  |
| C-7      | 35.92                        | 1.29 (1H, m); 1.55 (1H, m)         | 36.21                        | -                                  |
| C-8      | 43.15                        | -                                  | 43.46                        | -                                  |
| C-9      | 56.52                        | 1.59 (1H, m)                       | 56.19                        | 1.72 (1H, m)                       |
| C-10     | 39.64                        | -                                  | 40.24                        | -                                  |
| C-11     | 70.28                        | 3.90 (1H, m)                       | 70.69                        | 3.85 (1H, m)                       |
| C-12     | 38.41                        | 1.24 (1H, m); 1.96 (1H, m)         | 38.38                        | -                                  |
| C-13     | 37.87                        | 2.44 (1H, m)                       | 38.21                        | 2.79 (1H, m)                       |
| C-14     | 43.56                        | -                                  | 43.89                        | -                                  |
| C-15     | 30.26                        | 1.18 (1H, m); 1.46 (1H, m)         | 30.69                        | -                                  |



|                  |        |                                |        |                                            |
|------------------|--------|--------------------------------|--------|--------------------------------------------|
| C-16             | 35.11  | 1.63 (1H, m); 2.45 (1H, m)     | 32.86  | -                                          |
| C-17             | 56.74  | -                              | 57.89  | -                                          |
| C-18             | 49.65  | 1.64 (1H, m)                   | 50.22  | 1.65 (1H, m)                               |
| C-19             | 47.74  | 3.05 (1H, m)                   | 48.17  | 3.01 (1H, m)                               |
| C-20             | 151.14 | -                              | 151.32 | -                                          |
| C-21             | 31.44  | 1.38 (1H, m); 1.91 (1H, m)     | 31.60  | -                                          |
| C-22             | 37.40  | 1.48 (1H, m); 1.92 (1H, m)     | 37.47  | -                                          |
| C-23             | 177.78 | -                              | 29.65  | 1.04 (3H, s)                               |
| C-24             | 17.92  | 1.17 (3H, s)                   | 23.14  | 0.93 (3H, s)                               |
| C-25             | 17.97  | 0.96 (3H, s)                   | 17.18  | 1.03 (3H, s)                               |
| C-26             | 17.14  | 1.09 (3H, s)                   | 17.84  | 0.94 (3H, s)                               |
| C-27             | 15.02  | 1.05 (3H, s)                   | 15.06  | 0.86 (3H, s)                               |
| C-28             | 177.51 | -                              | 176.29 | -                                          |
| C-29             | 110.26 | 4.58 (1H, brs); 4.72 (1H, brs) | 110.75 | 4.61 (1H, brs); 4.76 (1H, brs)             |
| C-30             | 19.57  | 1.70 (3H, s)                   | 19.62  | 1.70 (3H, s)                               |
| C-28-O-inner glc |        |                                |        |                                            |
| 1                |        |                                | 95.30  | 5.45 (1H, d, 6.56)                         |
| 2                |        |                                | 74.01  | 3.32 (1H, m)                               |
| 3                |        |                                | 78.23  | 3.40 (1H, m)                               |
| 4                |        |                                | 71.03  | 3.41 (1H, m)                               |
| 5                |        |                                | 77.72  | 3.53 (1H, m)                               |
| 6                |        |                                | 69.54  | 3.81 (1H, m);<br>4.12 (1H, dd, 9.48, 1.36) |
| glc'(1→6)glc     |        |                                |        |                                            |
| 1'               |        |                                | 104.4  | 4.39 (1H, d, 6.28)                         |
| 2'               |        |                                | 75.21  | 3.23 (1H, m)                               |
| 3'               |        |                                | 76.68  | 3.43 (1H, m)                               |
| 4'               |        |                                | 79.67  | 3.52 (1H, m)                               |
| 5'               |        |                                | 76.84  | 3.28 (1H, m)                               |
| 6'               |        |                                | 61.8   | 3.65 (1H, m); 3.80 (1H, m)                 |
| rha(1→4)glc'     |        |                                |        |                                            |
| 1''              |        |                                | 102.93 | 4.84 (1H, overlapped)                      |
| 2''              |        |                                | 72.40  | 3.81 (1H, m)                               |
| 3''              |        |                                | 72.15  | 3.62 (1H, m)                               |
| 4''              |        |                                | 73.73  | 3.38 (1H, m)                               |
| 5''              |        |                                | 70.69  | 3.95 (1H, m)                               |
| 6''              |        |                                | 17.84  | 1.25 (3H, d, 4.96)                         |
| C-3-O-glc''      |        |                                |        |                                            |
| 1'''             |        |                                | 101.59 | 4.26 (1H, d, 6.56)                         |
| 2'''             |        |                                | 75.27  | 3.32 (1H, m)                               |
| 3'''             |        |                                | 78.38  | 3.52 (1H, m)                               |
| 4'''             |        |                                | 72.05  | 3.84 (1H, m)                               |
| 5'''             |        |                                | 78.06  | 3.53 (1H, m)                               |
| 6'''             |        |                                | 63.02  | 3.62 (1H, m); 3.82 (1H, m)                 |

Note: Assignments were done by HMQC, HMBC,  $^1\text{H}$ - $^1\text{H}$  COSY, and NOESY experiments; Glc: D-glucopyranosyl; Rha: L-rhamnopyranosyl; <sup>a</sup> Measured in  $\text{CD}_3\text{COCD}_3$ ; <sup>b</sup> Measured in  $\text{CD}_3\text{OD}$ ; <sup>c</sup> 100 MHz; <sup>d</sup> 400 MHz
